1                   **Ultrastructural and functional analysis of extra-axonemal structures in**  
2                                                   **trichomonads**

3   Veronica M. Coceres<sup>a, \*</sup>, Lucrecia S. Iriarte<sup>a</sup>, Abigail Miranda-Magalhães<sup>b</sup>, Thiago André Santos  
4   de Andrade<sup>c</sup>, Natalia de Miguel<sup>a</sup> and Antonio Pereira-Neves<sup>b, \*</sup>

5

6   <sup>a</sup> Laboratorio de Parásitos Anaerobios, Instituto Tecnológico Chascomús (INTECH), CONICET-  
7   UNSAM, Chascomús B7130IWA, Argentina.

8   <sup>b</sup> Fiocruz, Instituto Aggeu Magalhães, Departamento de Microbiologia, Recife, Pernambuco,  
9   Brazil.

10   <sup>c</sup>Fiocruz, Instituto Aggeu Magalhães, Departamento de Imunologia, Recife, Pernambuco, Brazil.

11   \* corresponding authors

12   E-mail: [antonio.neves@fiocruz.br](mailto:antonio.neves@fiocruz.br) (APN). Fiocruz PE, Instituto Aggeu Magalhães, Departamento  
13   de Microbiologia, Av. Professora Moraes rego, s/n - Cidade Universitária, Recife, PE, Brazil. Zip  
14   code: 50740-465. Phone: +55-81-21012633.

15

16   E-mail: [coceres@intech.gov.ar](mailto:coceres@intech.gov.ar) (VMC). INTECH, Intendente Marino km 8.2, Chascomús,  
17   Provincia de Buenos Aires (CP 7130), Argentina. Phone: +54-2241-430323; FAX +54-2241-  
18   424048.

## 19 **ABSTRACT**

20 *Trichomonas vaginalis* and *Tritrichomonas foetus* are extracellular flagellated  
21 parasites that inhabit humans and other mammals, respectively. In addition to motility,  
22 flagella act in a variety of biological processes in different cell types; and extra-axonemal  
23 structures (EASs) has been described as fibrillar structures that provide mechanical  
24 support and act as metabolic, homeostatic and sensory platforms in many organisms.  
25 Here, we identified the presence of EASs forming prominent flagellar swellings in *T.*  
26 *vaginalis* and *T. foetus* and we observed that their formation was associated with the  
27 parasites adhesion on the host cells, fibronectin, and precationized surfaces; and  
28 parasite:parasite interaction. A high number of rosettes, clusters of intramembrane  
29 particles that has been proposed as sensorial structures, and microvesicles protruding  
30 from the membrane were observed in the EASs. The protein VPS32, a member of the  
31 ESCRT-III complex crucial for diverse membrane remodeling events, the pinching off  
32 and release of microvesicles, was found in the surface as well as in microvesicles  
33 protruding from EASs. Moreover, we demonstrated that overexpression of VPS32  
34 protein induce EAS formation and increase parasite motility in semi-solid medium. These  
35 results provide valuable data about the role of the flagellar EASs in the cell-to-cell  
36 communication and pathogenesis of these extracellular parasites.

37

## 38 **INTRODUCTION**

39 The eukaryotic flagella are highly conserved microtubule-based organelles that  
40 extend from the cell surface. These structures, beyond being essential for cell  
41 locomotion and movement of fluids across the tissues and cells, are signaling platforms  
42 that receive and send information to drive cellular responses (Akella et al., 2020; Carter  
43 & Blacque, 2019). These functions are crucial for health, development and reproduction  
44 processes in most eukaryotes, including humans (Anvarian et al., 2019; Wan & Jekely,  
45 2020). In addition to cell movement (Imhof et al., 2019) and sensory functions (Maric et  
46 al., 2010), a variety of microorganisms employ flagella to control feeding (Dolger et al.,  
47 2017), mating (Fussy et al., 2017), cytokinesis (Hardin et al., 2017; Ralston et al., 2006),  
48 cell morphogenesis (Vaughan, 2010), cell communication (Szempruch et al., 2016) and  
49 cell adhesion (Frolov et al., 2018). Among these microorganisms, there are important  
50 human and veterinary parasitic protists, i.e. trichomonads, trypanosomatids,  
51 diplomonads and apicomplexa that exert a devastating economic burden on global  
52 healthcare systems and agriculture (Kruger & Engstler, 2015).

53           The trichomonads (Metamonada, Parabasalia) *Trichomonas vaginalis* and  
54 *Tritrichomonas foetus* are extracellular parasites that inhabit humans and other  
55 mammals, respectively. *T. vaginalis* is responsible for trichomoniasis, the most common  
56 non-viral sexually transmitted infection in men and women (WHO, 2018). Most infected  
57 people are asymptomatic, but when symptoms do occur, they can range from mild  
58 irritation to severe inflammation in various regions of the reproductive tract (Van Gerwen  
59 & Muzny, 2019). *T. vaginalis* is also associated with pelvic inflammatory disease,  
60 pregnancy complications, preterm birth, infertility (Kissinger, 2015; Meites et al., 2015)  
61 as well as increased risk to HIV (McClelland et al., 2007; Van Der Pol et al., 2008),  
62 papillomavirus infection and cervical or prostate cancer (Gander et al., 2009; Stark et  
63 al., 2009; Sutcliffe et al., 2009; Twu et al., 2014). *T. foetus* is a widespread pathogen  
64 that colonizes the reproductive tract of cattle and the large intestine of cats, leading to  
65 bovine and feline tritrichomonosis, respectively. Bovine tritrichomonosis is a venereal  
66 infection that causes significant economic losses in beef and dairy farming due to early  
67 embryonic death, abortion and infertility or culling of parasite carriers (Mardones et al.,  
68 2008; Martin-Gomez et al., 1998). Feline tritrichomonosis causes chronic diarrhea in  
69 cats (Gookin et al., 2017). *T. foetus* also lives as a commensal in the nasal and  
70 gastrointestinal mucosa of pigs (Dabrowska et al., 2020).

71           In each trichomonads genus, the flagella vary in number and size: *T. vaginalis*  
72 and *T. foetus* have five and four flagella, respectively (Benchimol, 2004). Like most  
73 eukaryotes, the structural basis of the trichomonads motile flagella is the canonical '9+2'  
74 microtubular axoneme surrounded by plasma membrane (Benchimol, 2004). In both  
75 species, the plasma membrane of the anterior flagella has rosette-like formations that  
76 have been proposed as sensorial structures (Benchimol et al., 1982; Honigberg et al.,  
77 1984). Based on this, some authors have suggested that the flagella could be involved  
78 in migration and sensory reception in trichomonads during adherence to host tissue and  
79 amoeboid morphogenesis (de Miguel et al., 2012; Kusdian et al., 2013; Lenaghan et al.,  
80 2014). However, the flagellar role during parasite cell adhesion, amoeboid  
81 transformation and cell-to-cell communication is still poorly understood.

82           In other organisms, flagella can send information via ectosomes (also called  
83 microvesicles), a type of extracellular vesicle that protrude and shed from the cell surface  
84 (Wang & Barr, 2018). In *Trypanosome*, these ectosomes can transfer virulence factors  
85 from one parasite to the other contributing to the pathogenesis (Szempruch et al., 2016).  
86 In this sense, our group recently reported that *T. vaginalis* release flagellar ectosomes  
87 that might have an important role in cell communication (Nievas et al., 2018). Proteins

88 from the endosomal sorting complex required for transport (ESCRT) machinery are  
89 involved in flagellar ectosomes release in protists. Specifically, ESCRT-III proteins may  
90 play a central role in promoting ectosome budding from the flagellum membrane (Long  
91 et al., 2016). However, the localization and possible functions of ESCRT proteins in the  
92 trichomonads flagella have not been determined yet.

93 In addition to axoneme and ectosomes, the assembly of extra-axonemal  
94 structures (EASs) occurs in many organisms ranging from mammalian and insects (Miao  
95 et al., 2019; Zhao et al., 2018) to protists, e.g. euglenozoa, dinoflagellates and *Giardia*  
96 (Maia-Brigagao et al., 2013; Moran, 2014; Portman & Gull, 2010). EASs are  
97 evolutionarily convergent, highly organized fibrillar structures that provide mechanical  
98 support and act as metabolic, homeostatic and sensory platforms for the regulation of  
99 flagellar beating (Moran, 2014; Portman & Gull, 2010). Depending on the cell type, EASs  
100 can be symmetrically or asymmetrically arranged around the axoneme and they can run  
101 along almost the entire length or only a portion of the flagellum (Portman & Gull, 2010).  
102 In protists, the paraflagellar rod (PFR), which is seen in trypanosomatids, is the best  
103 characterized EAS. PFR is required for motility, parasite attachment to host cells,  
104 morphogenesis and cell division (Portman & Gull, 2010). Although EASs, formed by thin  
105 filaments, have been described in some trichomonads and related parabasalid species  
106 (G. Brugerolle, 1999, 2005; Brugerolle & König, 1994; Mattern et al., 1973), there are  
107 no reports on the existence and role of EASs in *T. vaginalis* and *T. foetus*. In this work,  
108 using a detailed ultrastructural analysis, we identified the presence of EASs forming  
109 prominent flagellar swellings in *T. vaginalis* and *T. foetus*. Interestingly, we found that  
110 the formation of flagellar swellings was associated to: (a) amoeboid morphogenesis; (b)  
111 adhesion to host cells and fibronectin; and (c) parasite: parasite interaction. A high  
112 number of rosettes and microvesicles protruding from the membrane can be found in  
113 the EAS. Finally, we found that overexpression of a member of the ESCRT-III complex  
114 that localized at the flagellar swelling, named VPS32, induce EAS formation and  
115 increase parasite motility in semi-solid medium. Our data highlight a role for the EAS in  
116 the cell-to-cell communication and pathogenesis in *T. vaginalis* and *T. foetus*.

117

## 118 **RESULTS**

### 119 **Presence of flagellar swellings in *T. vaginalis* and *T. foetus***

120 To examine in detail the trichomonads flagellar morphology, we initially observed  
121 three wild-type strains of *T. vaginalis* and two different strains of *T. foetus* grown  
122 axenically using scanning (SEM) and transmission (TEM) electron microscopy. As can

123 be visualized in Figure 1, *T. vaginalis* has four anterior flagella (AF); *T. foetus* has three  
124 AF; both parasites have one recurrent flagellum (RF) that forms the undulating  
125 membrane. In *T. vaginalis*, the RF runs along two-thirds of the cell and no free portion is  
126 developed, whereas in *T. foetus* the RF reaches the posterior end of the cell and extends  
127 beyond the undulating membrane as a free tip (Fig. 1). As expected, the flagella of most  
128 of the parasites (between 89 to 99%) displayed a classical ultrastructure: a diameter of  
129 250-300 nm along their length and the flagellar membrane around the “9+2” axoneme  
130 (Fig. 1, insets). However, the presence of flagellar swellings in the tip or along the AF  
131 and RF was observed in 1-11% of *T. vaginalis* and 2-5% of *T. foetus* parasites analysed  
132 by SEM (Fig 2A). These swellings exhibited two different morphologies: “sausage-like”  
133 and “spoon-like” (Fig. 2B). The “sausage-like” swelling runs laterally or surrounding the  
134 axoneme, exhibiting a range size from 0.1 to 1 µm in thickness and a variable-length  
135 from 0.3 to 6 µm in *T. vaginalis* and up to 1 µm in *T. foetus* (Fig. 2B; Suppl Fig. 1). In the  
136 “spoon-like” swelling, the flagellum wraps around the swelling to form a rounded or  
137 ellipsoid structure measuring between 0.5 to 2.5 µm in the major axis in *T. foetus* and  
138 more than 4 µm long in *T. vaginalis* (Fig. 2B; Suppl Figs. 2A-C). The “spoon-like”  
139 structure can exhibit a flattened or concave surface in a frontal view, and an aligned,  
140 curved, or convex appearance in a side view (Suppl Figs. 2D-H). Based on the results  
141 in the Fig. 2A, subsequent experiments were performed using the B7RC2 and K strains  
142 of *T. vaginalis* and *T. foetus*, respectively. Curiously, while the “sausage-like” structure  
143 was more frequently found in *T. vaginalis*, the “spoon-like” was more common in *T.*  
144 *foetus* (Fig. 2C). Interestingly, although these structures can be found in all flagella, they  
145 are more frequent in AF in *T. vaginalis* and RF in *T. foetus* (Fig. 2D). The analysis of  
146 “spoon-like” and “sausage-like” flagellar distribution demonstrate that both types of  
147 structures can be identified in the RF and AF in *T. foetus* as well as in the AF of *T.*  
148 *vaginalis* (Fig. 2E). However, only “sausage-like” structures were detected in the RF of  
149 *T. vaginalis* (Fig. 2E-F). In *T. foetus*, around 3-6% of flagella with swelling exhibited  
150 “sausage” and “spoon-like” structures in the same flagellum (Fig. 2E-G). When the  
151 relative position of both types of structures along the flagella was evaluated, we noted  
152 that the “sausage-like” swelling was predominantly found at the flagellar tip of *T.*  
153 *vaginalis* and AF of *T. foetus* (Fig. 2H); however, it was also observed in the middle  
154 (Figs. 2H-I) and, rarely, at the tip and in the middle of the same flagellum (Figs. 2H-J).  
155 The “spoon-like” structure was usually located at the AF’s tip of both parasites, and,  
156 occasionally, seen in the middle of *T. foetus* RF (Figs. 2K-L).

157

## 158 **Flagellar swellings are extra-axonemal structures (EASs) formed by thin filaments**

159 To investigate the ultrastructural characteristics of flagellar swellings in  
160 trichomonads, we analyzed the flagella using negative staining and ultrathin section  
161 techniques for transmission electron microscopy (TEM) (Figs. 3-4). Our results  
162 demonstrate that flagellar microtubules are surrounded by a continuous membrane that  
163 comes from the cell body and that “sausage-like” swelling is formed by thin extra-  
164 axonemal filaments that run longitudinally along the axonemes (Fig. 3). A detailed  
165 analysis of longitudinal and transverse sections showed that the extra-axonemal  
166 filaments measure around 3 - 5 nm in diameter and their length varies according to the  
167 length of the swelling (Fig. 3C). To further understand the morphological organization of  
168 “sausage” swelling, we analysed complementary images acquired in different  
169 perspectives (Suppl. Fig. 3). Those results confirmed that the extra-axonemal filaments  
170 partially surround the axoneme, although SEM top view images may lead to  
171 misinterpretation of the flagella is totally surrounded by the swelling (Suppl. Fig. 3). In  
172 an oblique view, we noticed that the axoneme is in a slit of the swelling as a hot dog  
173 shaped structure (Suppl. Fig. 3). The “sausage” structures located in the middle of  
174 flagella and in the recurrent flagellum are also formed by extra-axonemal filaments  
175 (Suppl. Figs. 4-5), indicating that the flagellar swellings are EASs.

176 Additionally, we demonstrated that the “spoon-type” swelling is also an EASs  
177 formed by folding the axoneme around the extra-axonemal filaments (Fig. 4A). When  
178 observed in longitudinal sections, the filaments display a lattice-like arrange (Figs. 4B).  
179 In a transversal view, it can be observed that the filaments are organized in different  
180 orientations (Figs. 4C); probably due to the turns of the axoneme around the filaments.  
181 As swellings are formed by extra-axonemal filaments, it is very likely that morphological  
182 differences could be attributed to different phases of a single process. Supporting this,  
183 SEM analysis suggests that the “sausage” and the “spoon” could be different stages of  
184 a single event (Figs. 5A-B). The process might start with a small sausage-shaped EAS  
185 that give raise to a “spoon” when the flagella fold around an enlarged EAS and on  
186 themselves (Figs. 5A-B). TEM images confirmed that sausage shaped EAS is  
187 surrounding by axoneme (Fig. 5C). Because the *T. vaginalis*-RF has no free portion, this  
188 could help to explain why only sausage shaped EASs are observed in that flagellum,  
189 whereas both sausage and spoon shaped EASs are found in the free tip of *T. foetus*-RF  
190 (Suppl. Fig. 6).

191 The existence of rosette-like formations (clusters of intramembrane particles),  
192 proposed as sensorial structures, has been reported in the AF of *T. vaginalis* and *T.*

193 *foetus* (Benchimol & De Souza, 1990; Benchimol et al., 1981). In this regard, we  
194 evaluated the presence of rosettes in the *T. vaginalis* EASs by negative staining  
195 technique. Interestingly, we observed that flagella with EASs showed a higher number  
196 of rosettes/ $\mu\text{m}^2$  than those flagella without such structures (Fig. 6). In summary, our  
197 results demonstrated that EAS in trichomonads are membrane expansions with different  
198 morphologies (sausage/spoon), formed by thin filaments and a high number of rosettes  
199 in their membranes.

200

### 201 **The EASs formation increase during *T. vaginalis* and *T. foetus* attachment process**

202 The ability of trichomonads to colonize the epithelia has been studied in recent  
203 years; however, the role of flagella in this process is not fully understood. To evaluate a  
204 possible contribution of extra-axonemal structures to parasite attachment, parasites  
205 were incubated on fibronectin-coated coverslips or Alcian blue pre-cationized coverslips,  
206 washed with PBS to remove non-attached cells, and the formation of EASs was  
207 evaluated by SEM (Fig. 7 and Suppl. Fig. 7). Attached parasites remained on the  
208 coverslips, whereas non-attached cells were harvested by centrifugation and analysed  
209 using SEM. For control, parasites were incubated on uncovered coverslips, collected  
210 with a pipette, harvested by centrifugation, and also prepared for SEM. As expected,  
211 cells were in suspension and unattached on the uncovered coverslips (not shown);  
212 therefore, here, "Control" is defined as non-adherent, suspended cells from uncovered  
213 coverslips, whereas non-adherent parasites from fibronectin and Alcian blue interaction  
214 assays are called "Non-attached". Parasites from control exhibit the typical pyriform body  
215 and no cell clusters (suppl. Fig. 7A). As expected, attached parasites on fibronectin-  
216 coated coverslips exhibited an amoeboid morphology and many flagellar swellings (Fig.  
217 7A). The percentage of fibronectin-Attached parasites with EAS is higher when  
218 compared to the Non-attached and control groups (Figs. 7B-C). In control, EASs are  
219 found in 9.9% and 3.9% of *T. vaginalis* and *T. foetus*, respectively, whereas EAS  
220 formation is observed in 48.9% and 54.6% of fibronectin-Attached *T. vaginalis* and *T.*  
221 *foetus* groups, respectively (Figs. 7B-C). When the parasites were incubated onto  
222 coverslips pre-treated with Alcian-blue, the cells were found clustered, mainly *T.*  
223 *vaginalis*, displaying an amoeboid or ellipsoid form in both Attached and Non-attached  
224 groups (Suppl. Fig. 7A). Similarly, the percentage of parasites with EAS in the Alcian  
225 blue-attached parasite is higher when compared to control (Suppl. Figs. 7B-C). In  
226 control, EASs are found in 12.5% and 5.2% of *T. vaginalis* and *T. foetus*, respectively,  
227 whereas EAS formation is observed in 41.7% and 40.2% of Alcian-blue attached *T.*

228 *vaginalis* and *T. foetus* groups, respectively (Suppl. Figs. 7B-C). Unexpectedly, the  
229 percentage of *T. vaginalis* with EAS in the Alcian blue-Non-attached group was  
230 significantly higher when compared to control (Suppl. Figs. 7B-C)

231 Next, to evaluate if EASs have a role in host cell interaction, parasites were  
232 incubated with host cells and the number of parasites that contain flagellar swellings was  
233 quantified using SEM (Fig. 8). Two different ratios of parasites: host cells were used and  
234 parasites in absence of host cells were used as control (PBS). Upon exposure, EAS are  
235 found in some parasites and some swellings are seen in direct contact with the host cells  
236 (Fig. 8A). When *T. vaginalis* parasites are incubated with VECs (vaginal epithelial cells)  
237 at 1:1 and 5:1 ratio, the formation of EASs was observed in 27.4% and 30.7% of  
238 parasites, respectively (Fig. 8B). Similarly, when *T. foetus* are exposed to PECs (bovine  
239 preputial epithelial cells), EASs are observed in 25.6% and 36.6% of attached parasite  
240 at ratio of 1:1 and 5:1 respectively (Fig. 8C). Moreover, we observed that these  
241 structures were present in flagella of parasites in contact to prostatic cells, preputial  
242 mucus content and in contact to bacteria present in the microbiota of the reproductive  
243 system (Suppl. Fig. 8). Together, these results indicate that extra-axonemal structures  
244 are being formed in response to host cell exposure.

245

#### 246 **Microvesicles are shed from the membrane of EASs**

247 Flagella can send information through microvesicles (MVs) released from their  
248 membranes (Szempruch et al., 2016; Wood et al., 2013). Previous results from our group  
249 demonstrated that *T. vaginalis* release flagellar microvesicles; although their biological  
250 relevance still is unknown (Nievas et al., 2018). Here, we observed the presence of MVs  
251 associated to EASs by SEM, negative staining and ultrathin sections (Figs. 9A). We  
252 demonstrated that 44.1% and 47.1% of *T. vaginalis* and *T. foetus* from axenic culture  
253 with flagellar swelling, respectively, exhibit MVs protruding from the flagellar membrane  
254 of the EASs (Fig. 9B). Considering that formation of EASs increase during parasite  
255 attachment to host cells, the presence of MVs in EASs membrane and the role of MVs  
256 in cell communication, these results suggest a possible role of MVs protruding from  
257 EASs in attachment or parasite:host cell communication.

258

#### 259 **VPS32 localizes to the EASs and its overexpression increase EASs formation in** 260 ***T. vaginalis* and *T. foetus***

261 ESCRTIII complex (Endosomal sorting complex required for transport) is a  
262 key player in the regulation of membrane fission during MVs formation and membrane



263 remodeling (McCullough et al., 2018). VPS32 is an important component of the ESCRT-  
264 III complex (Cashikar et al., 2014). Hence, we transfected an HA-tagged version of the  
265 full length protein (VPS32FL-HA) in *T. vaginalis* and *T. foetus* to evaluate its localization  
266 by epifluorescence microscopy. Using an anti-HA antibody, we demonstrated that  
267 TvVPS32 and TfVPS32 are localized in the tip or along of recurrent and anterior flagella  
268 of parasites cultured in the absence of host cells (Fig. 10A). In concordance, the  
269 presence of TvVPS32 in the surface of extra-axonemal structures (EASs) as well as in  
270 MVs that protrudes from EASs was observed by immuno-gold electron microscopy using  
271 anti-HA antibody (Fig.10B). Based on this observation, we investigated the role of  
272 VPS32 EASs formation by analyzing the number of EASs in flagella of TvVPS32FL and  
273 TfVPA32FL parasites compared to parasites transfected with an empty plasmid  
274 (EpNeo). Interestingly, 15% and 18% of EASs were observed in TvVPS32 and TfVPS32  
275 transfected parasites, respectively compared to 5% of EASs observed in EpNeo  
276 parasites (Figs.10C-D).

277

### 278 **TvVPS32 might regulate parasites motility**

279 Information exchange between parasites of the same species could govern the  
280 decision to divide, to differentiate or to migrate as a group (Roditi, 2016). In some cases,  
281 this communication involves flagellar membrane fusion and the rapid exchange of  
282 proteins between connected cells (Szempruch et al., 2016). In this sense, our SEM  
283 observations demonstrate that *T. vaginalis* and *T. foetus* can connect to themselves by  
284 EASs present in flagella (Fig. 11A). Similarly, we observed that TvVPS32 transfected  
285 parasites can connect each other through the flagella and that TvVPS32 is localized in  
286 the flagella of parasites in contact (Fig. 11B). Based on this observation, we next decided  
287 to assess the motility capacity of TvVPS32 transfected parasites. To this end, TvEpNeo  
288 and TvVPS32 parasites were spotted onto soft agar and their migration capacity was  
289 analyzed by measuring the size of the halo diameter from the inoculation point to the  
290 periphery of the plate. As shown in Fig. 11C, the parasites transfected with TvVPS32  
291 have a higher capacity of migration compared to parasites transfected with TvEpNeo,  
292 which might be suggesting a possible role for VPS32 protein in parasite motility.

293

### 294 **DISCUSSION**

295 Flagella have been extensively described as important players for host invasion,  
296 pathogenicity, and intercellular communication in pathogenic protists, mainly in  
297 kinetoplastids (Frolov et al., 2018; Kelly et al., 2020; Shimogawa et al., 2018). However,

298 the structural organization and biological functions of trichomonads flagella remain  
299 largely unexplored. Most of studies about trichomonads flagella have focused on  
300 specializations of the flagellar membrane (Benchimol et al., 1982; Benchimol et al.,  
301 1992; Honigberg et al., 1984) , propulsion force (Lenaghan et al., 2014; Ribeiro et al.,  
302 2000), and axoneme structure (Lee et al., 2009; Lopes et al., 2001; Melkonian, 1991).  
303 Here, we used a combination of electron microscopy techniques to reveal the  
304 ultrastructure of a novel extra-axonemal structure (EAS) in *T. vaginalis* and *T. foetus*,  
305 the most studied and important human and veterinary trichomonads, respectively.  
306 Traditionally, it has been assumed that *T. vaginalis* and *T. foetus* do not have EASs  
307 (Benchimol, 2004; Lenaghan et al., 2014; Melkonian, 1991; Rocha et al., 2010);  
308 however, we observed, in addition to the classical axoneme, thin fibrillary structures  
309 surrounded by the flagellar membrane running longitudinally along the axonemes. This  
310 novel structure displays morphology of paraflagellar swellings when seen by SEM or  
311 light microscopy. These EASs are more frequently found at the tip of the anterior and  
312 recurrent flagella in *T. vaginalis* and *T. foetus*, respectively. Suggesting that the EASs  
313 might be an evolutionarily conserved in the Parabasalia Phylum, the ultrastructural  
314 features of *T. vaginalis* and *T. foetus* EASs are similar to the extra-axonemal filaments  
315 described in other trichomonads and related parabasalid species, such as, *Trichomitus*  
316 *batrachorum* (Mattern et al., 1973), *Tritrichomonas muris* (Viscogliosi & Brugerolle,  
317 1993), *Pentatrichomonoides* sp (Brugerolle & König, 1994) , *Pseudotrypanosoma*  
318 *giganteum* (Brugerolle, 1999) and *Gigantomonas herculea* (Brugerolle, 2005).

319 Although the ultrastructure of *T. vaginalis* and *T. foetus* has been extensively  
320 investigated (Benchimol, 2004; de Andrade Rosa et al., 2013; de Souza & Attias, 2018),  
321 we believed there are some reasons that could explain why EASs had not been reported  
322 before. First, under axenic growth conditions, the EASs are only observed in 1-11% of  
323 parasites. Considering these percentages, a careful observation under electron  
324 microscope, mainly TEM, might be needed to be able to identify and properly investigate  
325 this structure. Second, as flagellar swellings can exhibit distinct morphologies, sizes, and  
326 relative positions, they may have been misinterpreted as a feature of cell death, i.e.,  
327 flagellar blebbing, or an abnormality. Third, the EASs may have been considered as an  
328 artefact and just ignored or underappreciated by the investigators. In this regard,  
329 different authors using staining methods for light microscopy have described that the  
330 flagella of several parabasalids, including *T. vaginalis* and *T. foetus*, usually end with a  
331 granular or small swelling structure called “knob” (Čepička, 2016; Honigberg & King,  
332 1964; Kirby, 1951); however, it has suggested that “knobs” may be artifacts due to the

333 cell shrinkage during the fixation for protargol staining (Čepička, 2016; Ceza et al., 2015).  
334 Based on their location and morphologic similarities, we hypothesize that the EASs  
335 described here and the previously described “knobs” might be the same structure.

336 The EASs are found in the flagella of many cells including outer dense fibers and  
337 fibrous sheath of rodents and human sperm (Eddy et al., 2003; Linck et al., 2016),  
338 mastigonemes in *Chlamydomonas* (Liu et al., 2020), vane structures in the fornicate  
339 *Aduncisulcus paluster* (Yubuki et al., 2016), and the paraflagellar rod (PFR) of  
340 euglenoids and kinetoplastids (Zhang et al., 2021). They can run along the full length  
341 (outer dense fibers, fibrous sheath, and PFR), or just a portion, one or two-thirds of the  
342 axoneme (mastigonemes and vane structures). All those EASs have a striated  
343 appearance when viewed using TEM, suggesting a regular high-order structure.  
344 Similarly, the *T. vaginalis* and *T. foetus* EAS has also a striated fibrillar structure;  
345 however, whereas the outer dense fibers, mastigonemes, and PFR are regular intricate  
346 structures, linked to the axoneme via outer microtubule doublets, and found in all flagella  
347 from their respectively cell types (Linck et al., 2016; Liu et al., 2020; Zhang et al., 2021),  
348 the trichomonads EAS: (a) is not observed in all cells and axonemes; (b) it can be seen  
349 at the tip and/or middle of axoneme; (c) no association between the extra-axonemal  
350 filaments and axoneme microtubule doublets is still found; and (d) the organization and  
351 amount of the filaments can vary, resulting in two basic distinct morphologies, “sausage”  
352 and “spoon”, ranging in different sizes. Those findings indicate that the assembly of  
353 trichomonads EAS is not a regular feature and might require cell signaling responses.  
354 Additionally, our results suggest that the several shapes and sizes of trichomonads EAS  
355 might correspond to different phases of a single assembly event. We hypothesize that  
356 the process might start with a “sausage” EAS and the “spoon” morphology might be the  
357 “final destination” morphology. Further analysis by videomicroscopy could help us to  
358 confirm this hypothesis. Moreover, we do not know yet whether the trichomonads  
359 flagellar swellings are reversible. Importantly, the identification of non-regular and  
360 transient EASs has never been described. Additional studies are needed to investigate  
361 the assembly kinetics and protein composition of trichomonads EAS.

362 The flagellum is a crucial host-pathogen interface, mediating attachment of  
363 parasites to host tissues (Kelly et al., 2020). In this regard, EASs, such as PFR, has an  
364 important role in flagellar retraction and flagellar support during tissues attachment in  
365 different stages of their life cycle (Bastin et al., 1996; Maga & LeBowitz, 1999; Maharana  
366 et al., 2015). Also, these PFR has been proposed as a metabolic, homeostatic,  
367 regulatory and sensory platform (Portman & Gull, 2010). These functions seem to be

368 conserved among EASs during evolution. In this sense, the flagellar tip of *Crithidia*  
369 *fasciculata* is expanded up to six times its usual diameter upon contact with the insect  
370 host (Brooker, 1970). Also, arborescent outgrowths or "flagellipodia" were observed in  
371 the anterior flagellum of the bodonid flagellate *Cryptobia* sp. during their interaction to  
372 the snail *Triadopsis multilineata* (Current, 1980). Interestingly, the existence of flagellar  
373 morphological modifications seems to be related to adherence events along the life cycle  
374 in different flagellated organisms.

375 Here, we demonstrated that EASs formation increase during the attachment  
376 process in *T. vaginalis* and *T. foetus*. This finding is relevant considering that these  
377 protozoans are extracellular organisms, thus flagella and cell body are likely to play  
378 important roles in the initial adherence and survival of the pathogen on mucosal  
379 surfaces. It has been described that trichomonads flagella can interact with host  
380 epithelial cells, ECM proteins, yeasts, sperm cells and bacteria (Costa e Silva Filho et  
381 al., 1988; Midlej & Benchimol, 2010; Midlej et al., 2009; Pereira-Neves & Benchimol,  
382 2007). *T. foetus* uses the recurrent flagellum to establish the first contact upon  
383 attachment with the host cell (Singh et al., 1999). Here, our results suggest a role of  
384 EASs during *T. vaginalis* and *T. foetus* attachment to the host cells as the EASs have  
385 been observed in direct contact with the host cells and the network-shaped mesh of  
386 preputial mucus. Taking into account that *T. vaginalis* appears to use its flagella as the  
387 guiding end to migrate and penetrate host tissues (Kusdian et al., 2013), we consider  
388 that structural changes due to EASs by increasing the adhesion surface would also  
389 facilitate trichomonads displacement in a viscous environment (epithelial mucus) or  
390 some materials (e.g. semi-solid media). However, future work is necessary to investigate  
391 this hypothesis.

392 In *T. vaginalis*, the EASs membranes possess high numbers of rosettes or  
393 intramembrane particles. The presence of intramembranous particles forming circular  
394 rosettes in the membrane of anterior flagellar of trichomonads has been previously  
395 reported (Benchimol & De Souza, 1990; Benchimol et al., 1981). The rosettes has been  
396 compared to particles involved in membrane fusion in *Tetrahymena* and hypothesized  
397 to contribute to active exo- and endocytosis (Lenaghan et al., 2014; Satir et al., 1973).  
398 These specialized integral membrane particles might be involved in active sensing of  
399 environment and play a key role in controlling local calcium levels to regulate flagellar  
400 beating (Benchimol, 2004; Lenaghan et al., 2014). In this sense, the kinetoplastid PFR  
401 provides a platform for cAMP and calcium signaling pathways that control motility, host-  
402 pathogen interactions, and for metabolic activities that may participate in energy transfer

403 within the flagellum (Ginger et al., 2013; Portman & Gull, 2010; Shaw et al., 2019; Sugrue  
404 et al., 1988; Zhang et al., 2021). Similarly, the fibrous sheath of mammal sperm is a  
405 docking for key components in cAMP-signaling pathways, implicated in the regulation of  
406 sperm motility (Eddy et al., 2003). Based on the role of EASs in other organisms and our  
407 results, a sensory role for EASs might be suggested in *T. vaginalis*. The higher surface  
408 area of flagellar swellings due to EASs may provide a site for a greater number of  
409 rosettes.

410 The flagellar surface is a highly specialized subdomain of the plasma membrane,  
411 and flagellar membrane proteins are key players for all the biologically important roles  
412 of flagella (Landfear et al., 2015). In this sense, flagella are emerging as key players in  
413 cell-to-cell communication via shedding of microvesicles (MVs). MVs are observed  
414 protruding from flagellar tips of mammal cells (Nager et al., 2017; Salinas et al., 2017),  
415 the nematode *Caenorhabditis elegans* (Wang & Barr, 2018), and protists, including  
416 *Chlamydomonas* (Long et al., 2016), *Trypanosoma brucei* (Szempruch et al., 2016) and  
417 *T. vaginalis* (Nievas et al., 2018), suggesting that flagella may support MVs biogenesis.  
418 Here, we found MVs protruding from the trichomonads EASs. A higher area and  
419 curvature of the flagellar swellings may provide an advantage for the flagella to be used  
420 as a subcellular location for MVs biogenesis. In this context, ESCRT (endosomal sorting  
421 complexes required for transport) is an important mechanism known to facilitate the  
422 outward budding of membrane.

423 ESCRT proteins are emerging as versatile membrane scission machine that  
424 shape the behavior of membranes throughout the cell. In *Chlamydomonas reinhardtii*,  
425 ESCRT components are found in isolated ciliary transition zones, ciliary membranes,  
426 and ciliary microvesicles (Long et al., 2016). Additionally, ESCRT proteins mediate MVs  
427 release and influence flagellar shortening and mating (Diener et al., 2015; Long et al.,  
428 2016). ESCRT proteins are also found at the base of sensory cilia of *C. elegans* (Hu et  
429 al., 2007), suggesting that the ESCRT machinery are involved in flagellar function. In  
430 addition to mediate membrane budding and flagellar MVs shedding, ESCRT  
431 components may act as sensors for the generation and stabilization of membrane  
432 curvature of flagella (Jung et al., 2020; Long et al., 2016; Wang & Barr, 2018). Consistent  
433 with this, silencing of Vps36 in Trypanosomes, an ESCRT component, compromised the  
434 secretion of exosomes (Eliaz et al., 2017). In *T. vaginalis*, VPS32 protein (a member of  
435 ESCRT-III complex) has been identified in proteomic analyses of isolated exosomes and  
436 MVs (Nievas et al., 2018; Twu et al., 2013). Specifically, ESCRT-III has been shown to  
437 be crucial for diverse membrane remodeling events, the pinching off and release of MVs

438 (Huber et al., 2020). Here, we revealed that VPS32 is present in the membrane as well  
439 as in MVs protruding from of EASs, in both *T. foetus* and *T. vaginalis*. Interestingly, we  
440 demonstrated that formation of paraflagellar swellings increase in parasites  
441 overexpressing TvVPS32 and TfVPS32; suggesting that ESCRT-III complex might be  
442 involved in EAS formation. Based on the function of ESCRT-III complex in other  
443 organism we could speculate that VPS32 might be regulating the dynamic flagellar  
444 membrane transformation that occurs during EASs formation. Alternatively, VPS32  
445 could be participating in the final scission necessary for MVs release from flagellar  
446 membranes and subsequent membrane repair. Importantly, to our knowledge this is the  
447 first identification of an ESCRT protein associated with the flagella of a pathogenic  
448 protist.

449 In addition to release of extracellular vesicles, the contact between cells is also  
450 an important event in cell communication. Trypanosomes can interact with each other  
451 by flagellar membranes fusion, which could be partial and transient or irreversible and  
452 along the entire length of the flagellum (Imhof et al., 2016). These membrane fusion  
453 events might represent an alternative bidirectional mechanism used for proteins  
454 exchange with other individuals in a population. Fusion between membrane flagellar has  
455 been reported in *Crithidia Jasciculata* (Brooker, 1970), *Leptomonas lygaei* (Tieszen,  
456 1989) and *Trypanosoma melophagium* (Molyneux, 1975). Curiously, in *Crithidia*  
457 *Jasciculata* has been described the existence of interflagellar type B desmosomes  
458 (temporary structures) between adjacent flagella of the microorganisms in contact to  
459 each other. Such junctions appear to maintain the “cluster” integrity that this protist form  
460 in the gut of the mosquito or in cultures (Brooker, 1970). The association of “clustering”  
461 and amoeboid transformation with a higher parasite adherence capacity has been  
462 reported in *T. vaginalis*, however, the mechanisms behind this phenomenon still remain  
463 unknown (Lustig et al., 2013). Here, we demonstrated that trichomonads can connect  
464 with each other by EAS flagellar, suggesting that this connection could contribute to cell  
465 communication. Supporting this, we observed that adhesion assays with Alcian blue-  
466 and fibronectin-coated coverslips induced amoeboid transformation, cell clusters (only  
467 Alcian blue), and increased the EAS formation, suggesting that could have a positive  
468 correlation between amoeboid transformation, cells clusters and EASs formation.

469 The results obtained here also demonstrated that TvVPS32 is present in EAS of  
470 parasites in contact to each other and interestingly, parasites overexpressing TvVPS32  
471 showed greater motility in semisolid agar. Previously, we analyzed the growth rates of  
472 TvEpNeo and TvVPS32 parasites and we did not observe significant differences (data

473 not shown); thus, an increase in halo size diameter is related to migration and not with  
474 increase parasites number. It has been reported that *Trypanosoma brucei* engages  
475 polarized migrations across the semisolid agarose surface mediated by flagellum  
476 communication (Oberholzer et al., 2010). Taking into account that VPS32 is the scission  
477 effector in different cellular membranes (Tang et al., 2015), we could speculate that this  
478 protein might be responsible of regulating different scission events during parasite:  
479 parasite communication or participating in flagellar membranes transformation important  
480 for parasite motility. However, future studies are needed to establish the specific function  
481 of ESCRT-III within this process in trichomonads.

482 This study will certainly shed light to our understanding on the flagella biology in  
483 pathogenic trichomonads. In summary, we described a novel EAS that provides a larger  
484 flagellar contact surface and added to this, the presence of rosettes and MVs in their  
485 membranes leads us to speculate that these structures could be involved in sensing,  
486 signaling, cell communication, and pathogenesis in trichomonads. In the future,  
487 continuing studies about the structure, proteomic, and assembly of EASs will enable us  
488 to better define how those mentioned functions are mediated by flagella in these  
489 extracellular parasites. Because the flagellum is an essential organelle, defining the  
490 flagellar morphology and roles in *T. vaginalis* and *T. foetus* may therefore help us to  
491 understand how the parasite colonizes the urogenital tract, how to prevent or treat  
492 infections, and uncover novel drug targets. In addition, trichomonads could emerge as a  
493 model system for studies of the conserved aspects of eukaryotic flagellum and EASs,  
494 providing new insights into evolutionary and functional aspects with direct relevance to  
495 other eukaryotes, including humans, in which flagella/cilia are essential for development  
496 and physiology, and defects can provoke several morbidities or fatal diseases.

497

## 498 **MATERIALS AND METHODS**

### 499 **Parasites culture**

500 The *T. vaginalis* strains B7RC2 (Parental, ATCC 50167), Jt and FMV1 (Midlej &  
501 Benchimol, 2010) and *T. foetus* K (parental) and CC09-1s strains (Pereira-Neves et al.,  
502 2014) were cultured in Diamond's Trypticase-yeast extract-maltose (TYM) medium  
503 supplemented with 10% bovine serum and 10 U/ml penicillin/10 ug/ml streptomycin  
504 (Invitrogen). Parasites were grown at 37°C and passaged daily. 100 µg ml<sup>-1</sup> G418  
505 (Invitrogen) was added to culture of the TvEpNeo/TvVPS32-HA and TfEpNeo/TfVPS32-  
506 HA transfectants.

507

## 508 **Plasmid construction and exogenous protein expression in trichomonads**

509 The TvVPS32 construct was generated using primers with *NdeI* and *KpnI*  
510 restriction sites engineered into the 5'- and 3'-primers respectively. Polymerase chain  
511 reaction fragments were generated using standard procedures, and the resulting  
512 fragments were then cloned into the Master-Neo-(HA)<sub>2</sub> plasmid to generate constructs  
513 to transfect into *T. vaginalis* and *T. foetus*. Electroporation of *T. vaginalis* G3 strain was  
514 carried out as described previously (Delgadillo et al., 1997), with 50 µg of circular  
515 plasmid DNA. Transfectants were selected with 100 mg ml<sup>-1</sup> G418 (Sigma). The  
516 TvVPS32 construct was generated and transfected into *T. foetus* K as previously  
517 described (Iriarte et al., 2018).

518

## 519 **Scanning electron microscopy (SEM)**

520 Cells were washed with PBS and fixed in 2.5% glutaraldehyde in 0.1 M cacodylate  
521 buffer, pH 7.2. The cells were then post-fixed for 15 min in 1% OsO<sub>4</sub>, dehydrated in  
522 ethanol and critical point dried with liquid CO<sub>2</sub>. The dried cells were coated with gold-  
523 palladium to a thickness of 25 nm and then observed with a Jeol JSM-5600 scanning  
524 electron microscope, operating at 15 kV.

525

## 526 **Transmission electron microscopy (TEM)**

### 527 **Routine preparation**

528 The parasites were washed with PBS and fixed in 2.5% glutaraldehyde in 0.1 M  
529 cacodylate buffer, pH 7.2. The cells were then post-fixed for 30 min in 1% OsO<sub>4</sub>,  
530 dehydrated in acetone and embedded in Epon (Polybed 812). Ultra-thin sections were  
531 harvested on 300 mesh copper grids, stained with 5 % uranyl acetate and 1% lead  
532 citrate, and observed with a FEI Tecnai Spirit transmission electron microscope. The  
533 images were randomly acquired with a CCD camera system (MegaView G2, Olympus,  
534 Germany).

535

### 536 **Negative staining**

537 Parasites were settled onto positively charged Alcian blue-coated carbon film  
538 nickel grids (Labhart & Koller, 1981) for 30 min at 37°C. Next, cells were fixed in 2.5%  
539 glutaraldehyde in PEME (100 mM PIPES pH 6.9, 1 mM MgSO<sub>4</sub>, 2 mM EGTA, 0.1 mM



540 EDTA) for 1h at room temperature. To better visualize the axoneme and EAS, parasites  
541 were permeabilized with 1% Triton X-100 for 10 min, washed with water, and negatively  
542 stained with 1% aurothioglucose (UPS Reference Standard) in water for 5 s.  
543 Alternatively, non-permeabilized cells were stained with 2% uranyl acetate in water for  
544 10 s in order to visualize the flagellar rosettes. The grids were then air-dried and  
545 observed as described above.

546

### 547 **Immunogold**

548 Parasites were settled onto nickel grids as mentioned above, followed by fixation  
549 with 4% paraformaldehyde, 0.5 % glutaraldehyde in PEME for 1 h at room temperature.  
550 After washes in PEME, the grids were incubated with 1% Triton X-100 in PEME for 10  
551 min and quenched in 50 mM ammonium chloride, 3% and 1% BSA, and 0.2% Tween-  
552 20 in PBS (pH 8.0). Next, the grids were incubated with anti-HA tag antibody (Invitrogen,  
553 5B1D10), 10X diluted in 1% BSA in PBS for 3 h at room temperature. The grids were  
554 washed with 1% BSA in PBS and labelled for 60 min with 10 nm gold-labelled goat anti-  
555 mouse IgG (BB International, UK), 100 x diluted in 1% BSA in PBS, at room temperature.  
556 Samples were washed with PEME and water, negatively stained and observed as  
557 mentioned above. As negative control, the primary antibodies were omitted, and the  
558 samples were incubated with the gold-labelled goat anti-mouse antibody only. No  
559 labelling was observed under this condition.

560

### 561 **Parasite adhesion assays**

562 Alcian blue and fibronectin were used in promoting cell adhesion to glass  
563 coverslips. Alcian blue-coated coverslips were prepared as previously described  
564 (Morone et al., 2006). Fibronectin-coated coverslips were prepared by first covering  
565 them with 100  $\mu$ L of human (Sigma F0556) or bovine (Sigma F01141) fibronectin  
566 (working solution of 10  $\mu$ g/mL in sterile PBS) for 1h at room temperature and washing  
567 them with sterile PBS. Parasites ( $1 \times 10^6$  cells/mL) were washed in PBS (pH 7.2) and  
568 resuspended in TYM medium without serum and PBS for Alcian blue and fibronectin  
569 assays respectively. A suspension of 50  $\mu$ L was incubated on 1% Alcian blue or  
570 fibronectin-coated glass coverslips in humidity chamber for 0.5 to 2 h at 37°C. The  
571 parasites adhesion was monitored using an inverted phase contrast microscope. Non-  
572 adherent cells were collected with a pipette, harvested by centrifugation and washed  
573 with PBS. Next, the coverslips were rigorously washed with PBS to remove non-

574 adherent parasites. Adherent cells remain on the coverslips even after several washes.  
575 Both adherent and non-adherent cells were then fixed and analysed using SEM as  
576 mentioned above. For the control experiments, parasites resuspended in TYM medium  
577 without serum or PBS were incubated on uncovered coverslips under the same  
578 conditions, collected with a pipette, harvested by centrifugation, and analysed as  
579 mentioned above.

580

## 581 **Parasite–host cell interaction**

582 Human vaginal epithelial cells (VECs) were obtained from vaginal swabs of two  
583 healthy uninfected donors, 20 and 25 years old, with written consent. The cells were  
584 suspended in 20 ml of warm (37 °C) PBS (pH 7.2) just prior to experiments. Fresh bovine  
585 preputial epithelial cells (PECs) were kindly provided by Dr. Maria Aparecida da Gloria  
586 Faustino from the Faculty of Veterinary Medicine/Rural Federal University of  
587 Pernambuco. PECs were collected by aspiration with an artificial insemination pipette or  
588 by scraping the preputial cavity from a mature bull (> 4 years old) and suspended in 50  
589 ml of warm (37 °C) PBS (pH 7.2) just prior to experiments. Next, VECs and PECs were  
590 washed 2 times in warm PBS by centrifugation at 400 x g for 5 min, suspended to a  
591 cellular density of 10<sup>5</sup>cells/ml in warm PBS and immediately used for interaction assays.  
592 VECs and PECs were co-incubated with *T. vaginalis* and *T. foetus*, respectively, at cell  
593 ratios of 1:1 or 5:1 parasite: host cell in PBS-F (PBS with 1% FBS at pH 6.5) at 37°C for  
594 30 min. Prior to the co-incubation, parasites were washed three times in PBS, pH 7.2,  
595 and incubated to PBS-F at 37 °C for 15 min. In some assays, the human benign prostate  
596 epithelial line BPH1 was grown as described (Twu et al., 2013) and co-incubated with *T.*  
597 *vaginalis* as described above. For the control experiments, parasites incubated in PBS  
598 in the absence of host cells were analysed. The interactions were analysed using SEM,  
599 as mentioned above.

600

## 601 **Immunofluorescence assays**

602 Parasites expressing the hemagglutinin-tag (HA) version of TvVPS32 and  
603 TfVPS32 were incubated at 37 °C on glass coverslips for 4 hours as previously described  
604 (Coceres et al., 2015). The parasites were then fixed and permeabilized in cold methanol  
605 for 10 min. Cells were then washed and blocked with 5% fetal bovine serum (FBS) in  
606 phosphate buffered saline (PBS) for 30 min, incubated with a 1:500 dilution of anti- HA  
607 primary antibody (Covance, Emeryville, CA, USA) and 1:500 dilution of anti- tubulin

608 primary antibody diluted in PBS plus 2% FBS for 2 hours at RT, washed with PBS, and  
609 then incubated with a 1:5000 dilution of Alexa Fluor-conjugated secondary antibody  
610 (Molecular Probes) 1 hour at RT. The coverslips were mounted onto microscope slips  
611 using ProLong Gold antifade reagent with 4, 6'-diamidino-2- phenylindole (Invitrogen).  
612 All observations were performed on a Nikon E600 epifluorescence microscope. Adobe  
613 Photoshop (Adobe Systems) was used for image processing.

614

### 615 **Motility assay**

616 Parasites TvEpNeo and TvVPS32 ( $1 \times 10^6$  cells) were inoculated in soft-agar  
617 plates with Diamond's, 5% FBS, and 0.32% agar and 10 U/ml penicillin/10 ug/ml  
618 streptomycin (Invitrogen). Parasites migration was monitored by analyze the colony  
619 diameter during 4 days under microaerophilic conditions at 37°C. Halo diameter was  
620 determined by ImageJ (image processing program).

621

### 622 **Quantitative analysis**

623 The measurement of EAS filaments was carried out using TEM Imaging &  
624 Analysis (TIA) software of the microscope (FEI Company). The percentage of parasites  
625 that contain flagellar swelling was determined from counts of at least 500 parasites  
626 randomly selected per sample, using SEM or light microscope. The quantification of  
627 morphological aspects and distribution of flagellar swellings per cell was determined  
628 from counts of 100 parasites displaying at least one swelling per sample, using SEM.  
629 The morphology and relative position of flagellar swelling per flagellum was determined  
630 from counts of at least 100 anterior and recurrent flagella with swelling per sample, using  
631 SEM. The number of rosettes/ $\mu\text{m}^2$  was determined from counts of 50 flagella with or  
632 without swellings from at least ten randomly fields in the TEM grids using TIA software.  
633 The results are the average of three independent experiments performed at least in  
634 duplicate. Statistical comparison was performed ANOVA test, using computer analysis  
635 (GraphPad Prism v. 7.04, California, USA).  $P < 0.05$  was statistically significant.

636

### 637 **ACKNOWLEDGMENTS**

638 We thank Dr. Marlene Benchimol from Universidade do Grande Rio for kindly providing  
639 *T. vaginalis* Jt and FMV1 strains and *T. foetus* K strain. We thank Dr. Milena Paiva and  
640 Dr. Maria Aparecida da Gloria Faustino from Instituto Aggeu Magalhães and Faculty of

641 Veterinary Medicine/Rural Federal University of Pernambuco, respectively, for kindly  
642 providing PECs. We thank to Dr. Karina Saraiva and Dr. Cássia Docena from the  
643 Technological Platform Core of the Aggeu Magalhães Institute for their technical  
644 support.

645

## 646 **FUNDING**

647 This work was supported by Conselho Nacional de Desenvolvimento Científico e  
648 Tecnológico (CNPq; grants: 404935/2016-8 and 400740/2019-2 Antonio Pereira-Neves)  
649 and by ANPCyT (Grant BID PICT 2016-0357-VC Veronica Coceres).

650

## 651 **AUTHOR CONTRIBUTIONS**

652 Conceived and designed the experiments: VMC, NdM, APN. Performed the  
653 experiments: VMC, LSI, AMM, TASA, APN. Analyzed the data: VMC, NdM, APN.

654 Contributed reagents/materials/analysis tools: VMC, NdM, APN. Wrote the paper: VMC,  
655 NdM, APN. All the authors were involved in reviewing and editing the manuscript. All  
656 authors read and approved the final manuscript

657

## 658 **COMPETING INTERESTS**

659 The authors declare that no competing interests exist.

660 **Figure 1**

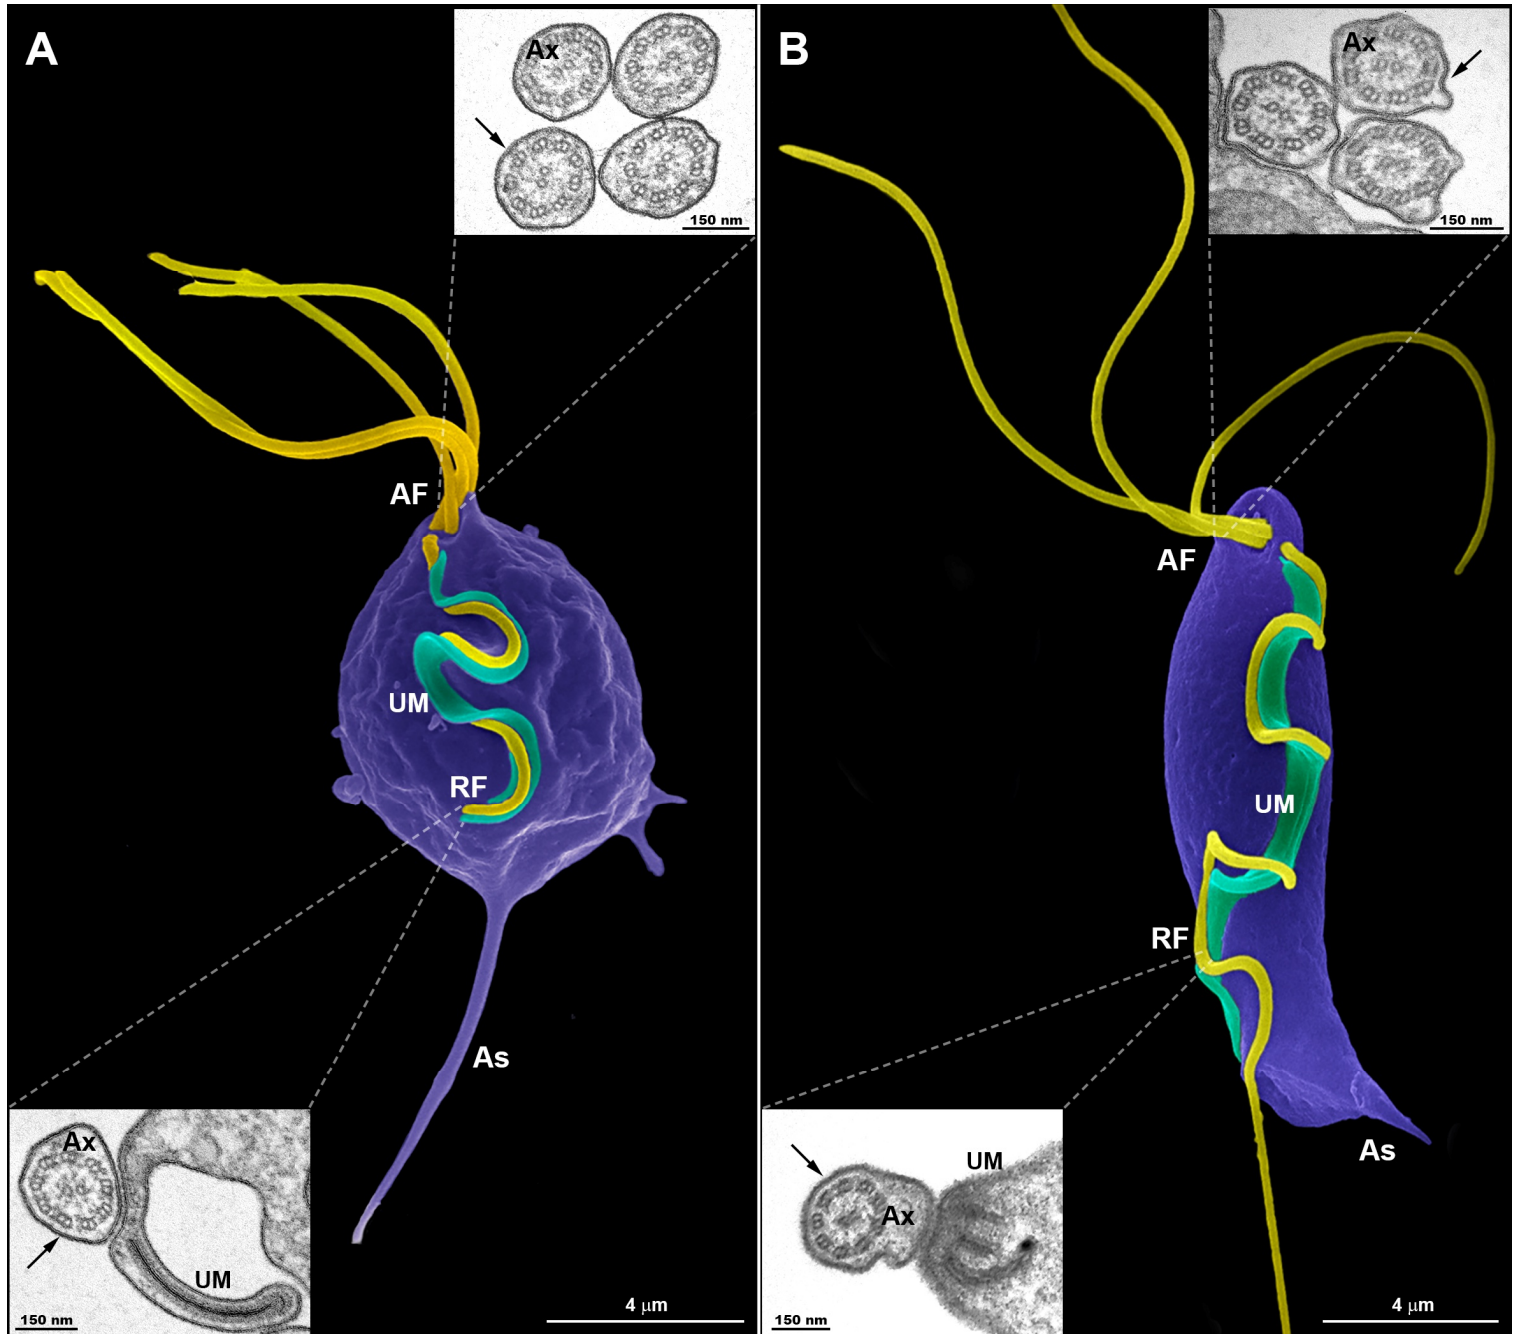

661 **Figure 1. Typical morphology of trichomonads grown in axenic culture.** SEM of *T. vaginalis*  
662 (A) and *T. foetus* (B) with the pear-shaped cell bodies colored violet and flagella colored yellow.  
663 *T. vaginalis* exhibits four anterior flagella (AF), whereas *T. foetus* has three AF; both parasites  
664 have one recurrent flagellum (RF) that runs posteriorly along the cell body, forming an undulating  
665 membrane (UM – colored green). The *T. vaginalis*-RF is shorter than *T. foetus*-RF. The later  
666 displays a distal free end. The flagella are the same width along their length and no swellings or  
667 enlarged areas are seen. The axostyle (As) tip is visible. The insets are TEM images of the AF  
668 (upper insets) and RF (lower insets) in representative transverse sections, viewed from the  
669 proximal and distal end, respectively. Note the 9+2 axoneme (Ax) enclosed within the flagellar  
670 membrane (arrows). No EAS are seen.

671 **Figure 2**

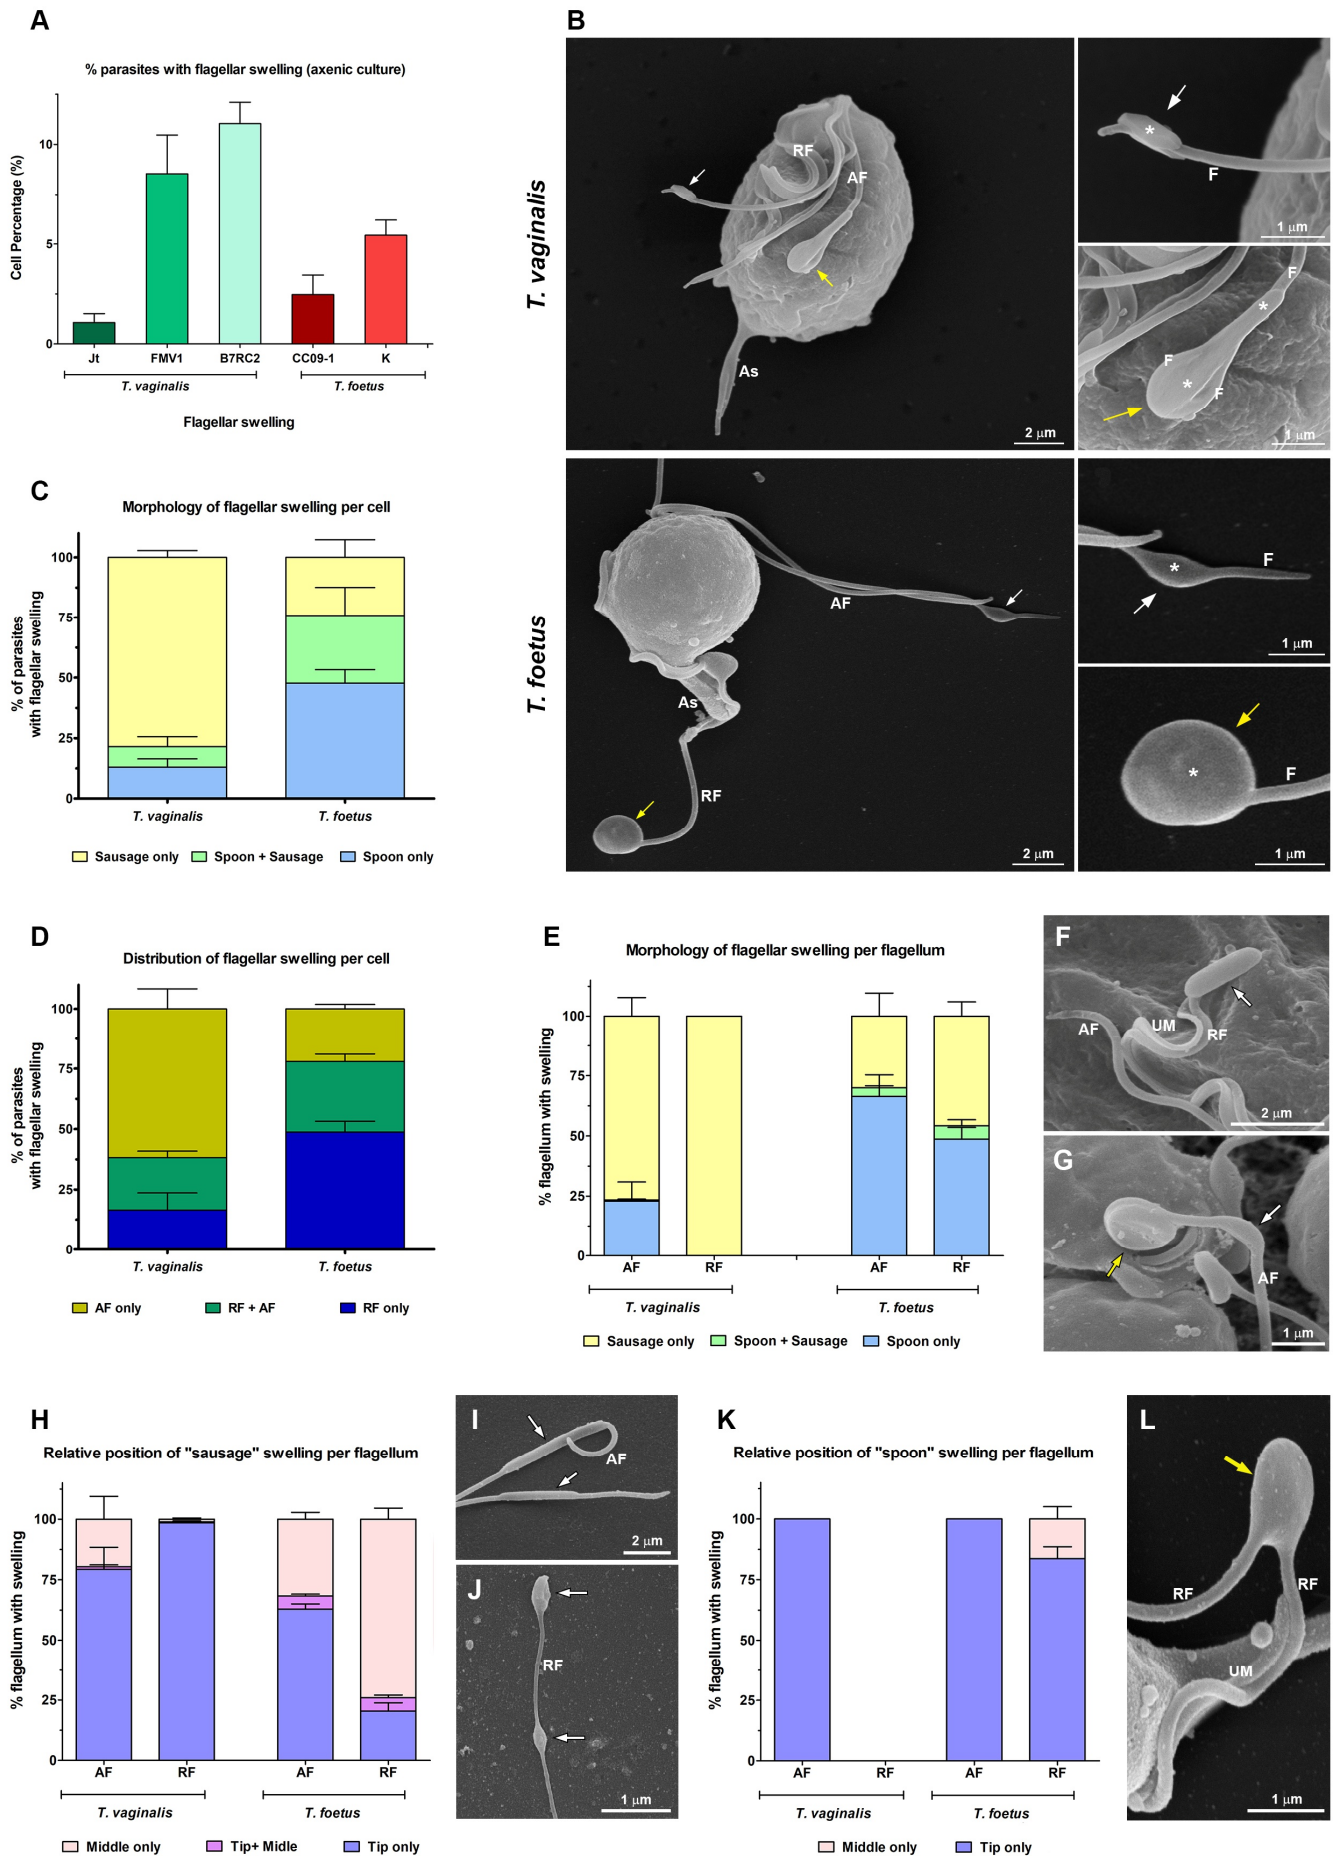

672 **Figure 2. Morphological analyses of flagellar swellings in *T. vaginalis* and *T. foetus* under**  
673 **standard growth conditions. (A)** Quantification of the percentage of parasites that display  
674 flagellar swellings. The values are expressed as the means  $\pm$  the standard deviation (SD) of  
675 three independent experiments, each performed in duplicate. 500 parasites per sample were  
676 randomly counted. **(B)** General and detailed views of flagellar swellings (\*) in *T. vaginalis* and *T.*  
677 *foetus* obtained by SEM. The swellings can exhibit two different morphologies: "sausage  
678 shaped" (white arrows) and "spoon shaped" (yellow arrows). Notice that the "sausage-like"  
679 swelling runs laterally to the flagellum (F), whereas, in the spoon shaped structure, the swelling  
680 is surrounded by flagellum. AF, anterior flagella; RF, recurrent flagellum; As, axostyle. **(C-D)**  
681 Quantitative analysis of morphology **(C)** and distribution **(D)** of flagellar swellings per parasite.  
682 Three independent experiments in duplicate were performed and 100 parasites exhibiting at  
683 least one swelling were randomly counted per sample using SEM. Data are expressed as  
684 percentage of parasites with flagellar swelling  $\pm$  SD. AF, anterior flagella; RF, recurrent flagellum.  
685 **(E)** Quantification of the morphology of flagellar swelling per flagellum. The values are expressed  
686 as the means of the percentage of flagellum with swelling  $\pm$  SD of three independent  
687 experiments, each performed in duplicate. 100 anterior and recurrent flagella with swelling per  
688 sample were randomly counted using SEM. AF, anterior flagella; RF, recurrent flagellum. **(F-G)**  
689 Detailed views of a recurrent flagellum (RF) of *T. vaginalis* **(F)** and an anterior flagellum (AF) of  
690 *T. foetus* **(G)** by SEM. UM, undulating membrane. In **(F)**, a sausage shaped swelling (arrow) is  
691 seen in the tip of the flagellum. Notice in **(G)** the presence of "sausage" (white arrow) and "spoon-  
692 like" (yellow arrow) structures in the same flagellum. **(H)** Analysis of the relative position of  
693 "sausage" swelling per flagellum. Three independent experiments in duplicate were performed  
694 and 100 anterior and recurrent flagella with swelling per sample were randomly counted using  
695 SEM. Data are expressed as percentage of flagellum exhibiting swelling  $\pm$  SD. AF, anterior  
696 flagella; RF, recurrent flagellum. **(I-J)** SEM of sausage shaped structures (arrows) located along  
697 the anterior flagella (AF) of *T. vaginalis* **(I)** and at the tip and in the middle of the same recurrent  
698 flagellum of *T. foetus* **(J)**. **(K)** Quantification of the relative position of "spoon" swelling per  
699 flagellum. The values are expressed as the means of the percentage of flagellum exhibiting  
700 swelling  $\pm$  SD of three independent experiments, each performed in duplicate. 100 anterior and  
701 recurrent flagella with swelling per sample were randomly counted using SEM. AF, anterior  
702 flagella; RF, recurrent flagellum. **(L)** SEM of a spoon shaped structure (arrow) located in the  
703 middle of *T. foetus* recurrent flagellum (RF). UM, undulating membrane.

704 **Figure 3**

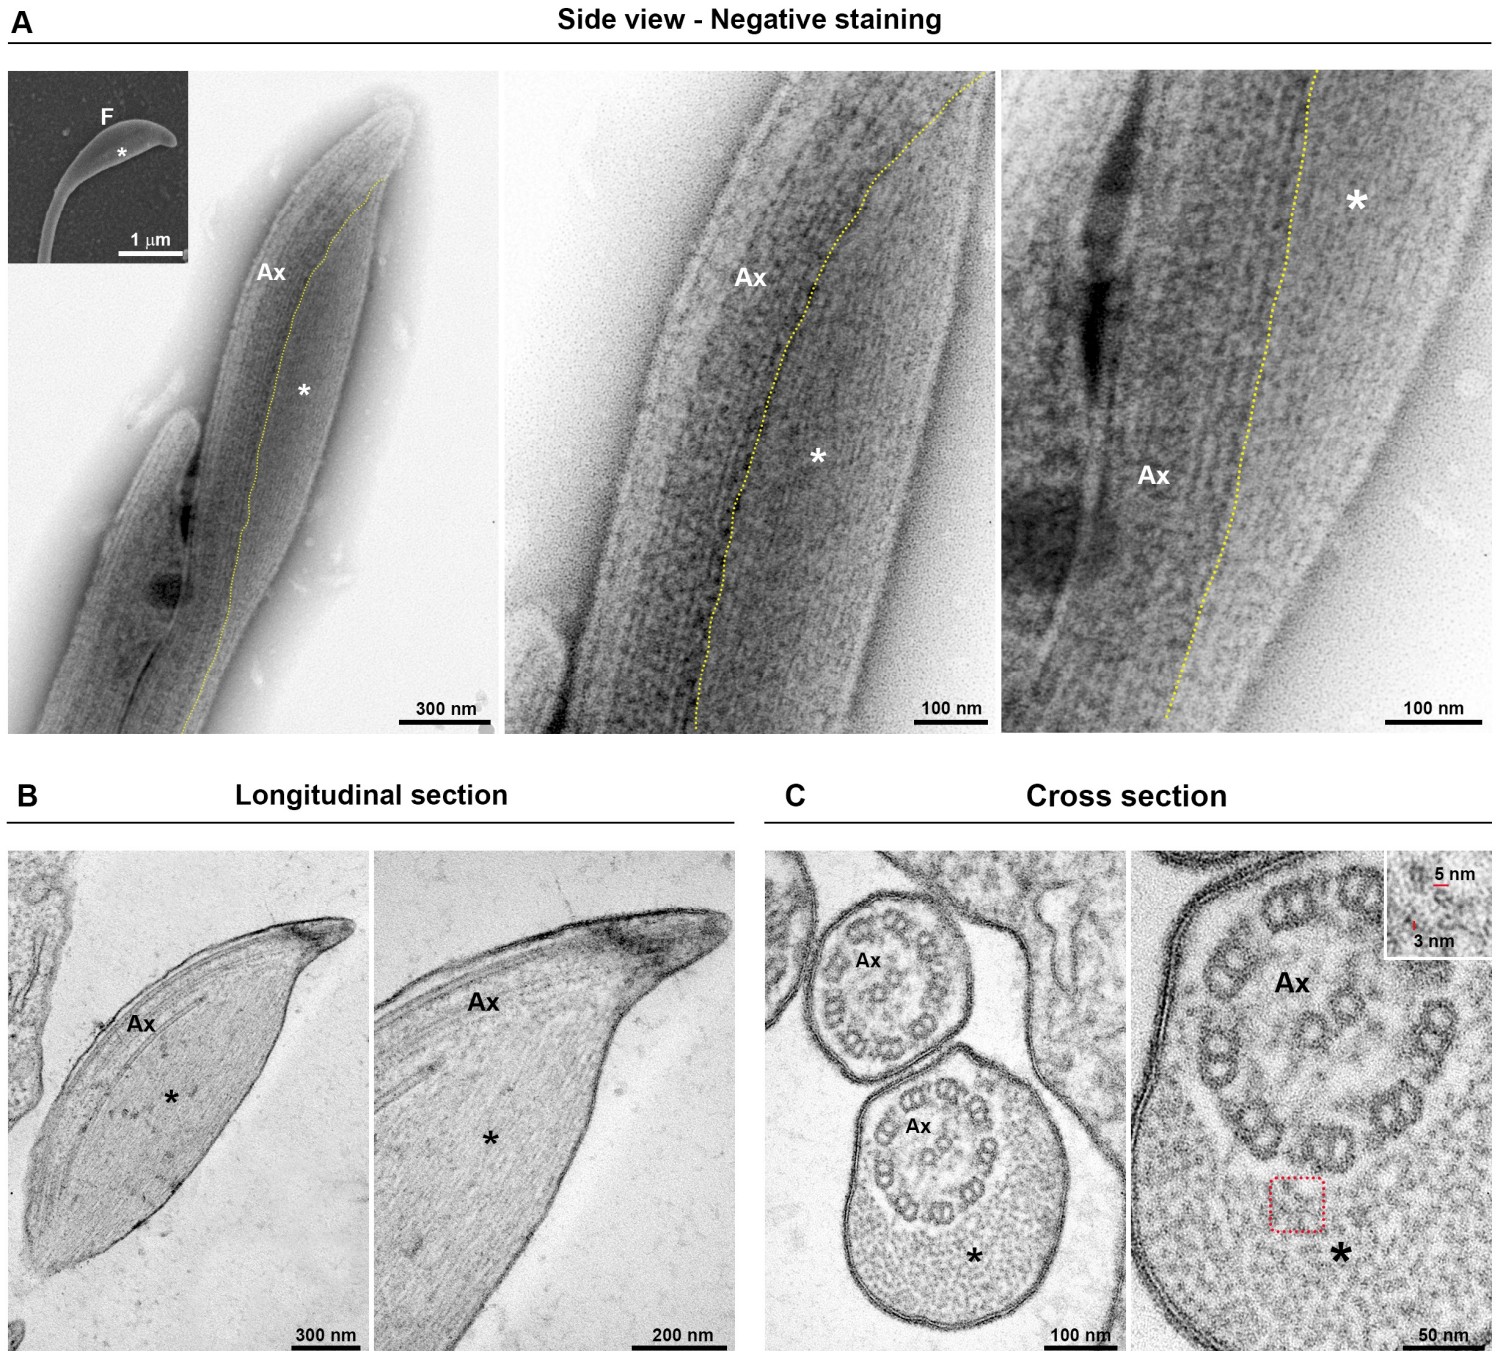

705 **Figure 3. Ultrastructure of the flagellar sausage shaped swelling.** The structure is formed  
706 by thin extra-axonemal filaments (\*) that run longitudinally along the axoneme (Ax). (A) Negative  
707 staining images of a swelling on side view. The dotted lines indicate boundary between axoneme  
708 and the extra-axonemal filaments. Inset, a complementary SEM image is used as reference. F,  
709 flagellum. (B-C) Longitudinal and cross ultrathin sections. The extra-axonemal filaments  
710 measure around 3 - 5 nm in diameter (inset).



711 **Figure 4**

**A** Frontal view - Negative staining

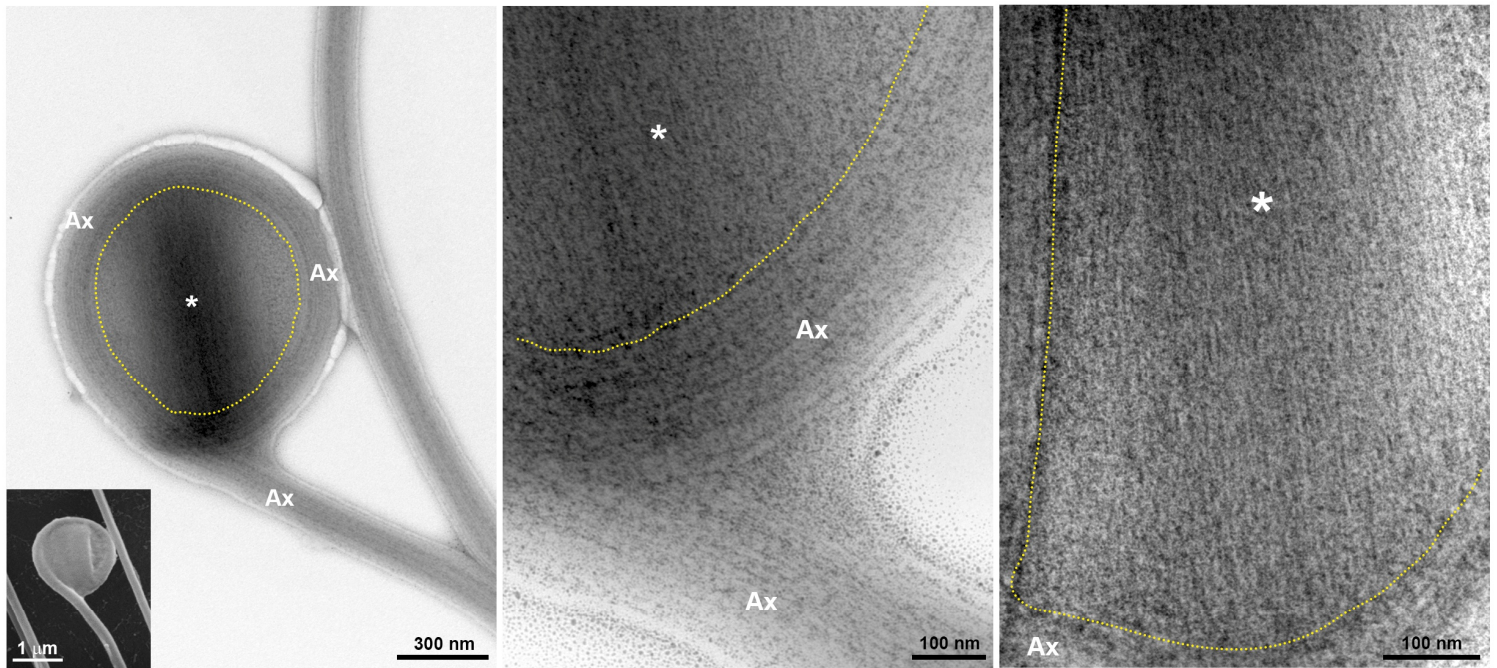

**B** Longitudinal section

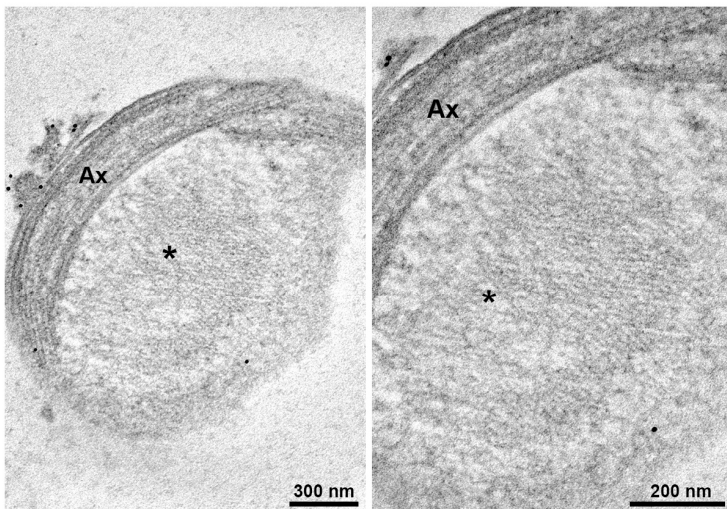

**C** Cross section

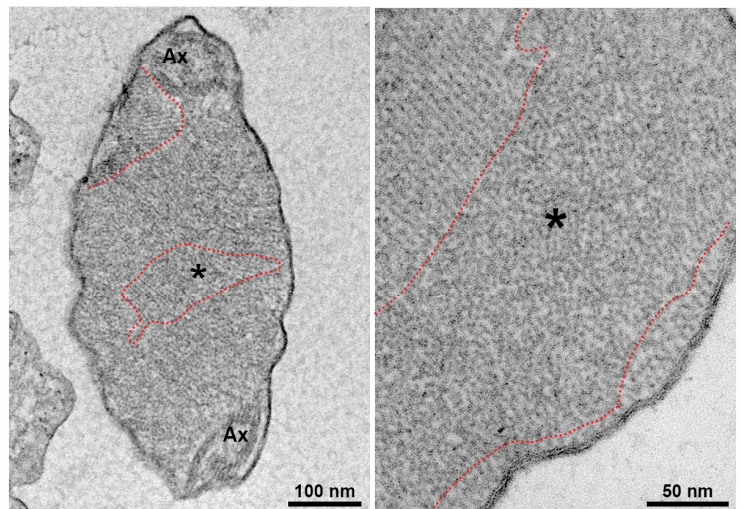

712 **Figure 4. Fine structure of the flagellar “spoon-like” swelling.** The structure is formed by  
713 folding the axoneme (Ax) around the thin extra-axonemal filaments (\*). **(A)** Negative staining  
714 images of a swelling on frontal view. The dotted lines indicate boundary between axoneme and  
715 the extra-axonemal filaments. Inset, a complementary SEM image is used as reference. **(B)**  
716 Longitudinal ultrathin sections. The extra-axonemal filaments display a lattice-like arrange. **(C)**  
717 Cross ultrathin sections. The filaments are seen organized in different orientations, as indicated  
718 by the dotted lines.

719 **Figure 5**

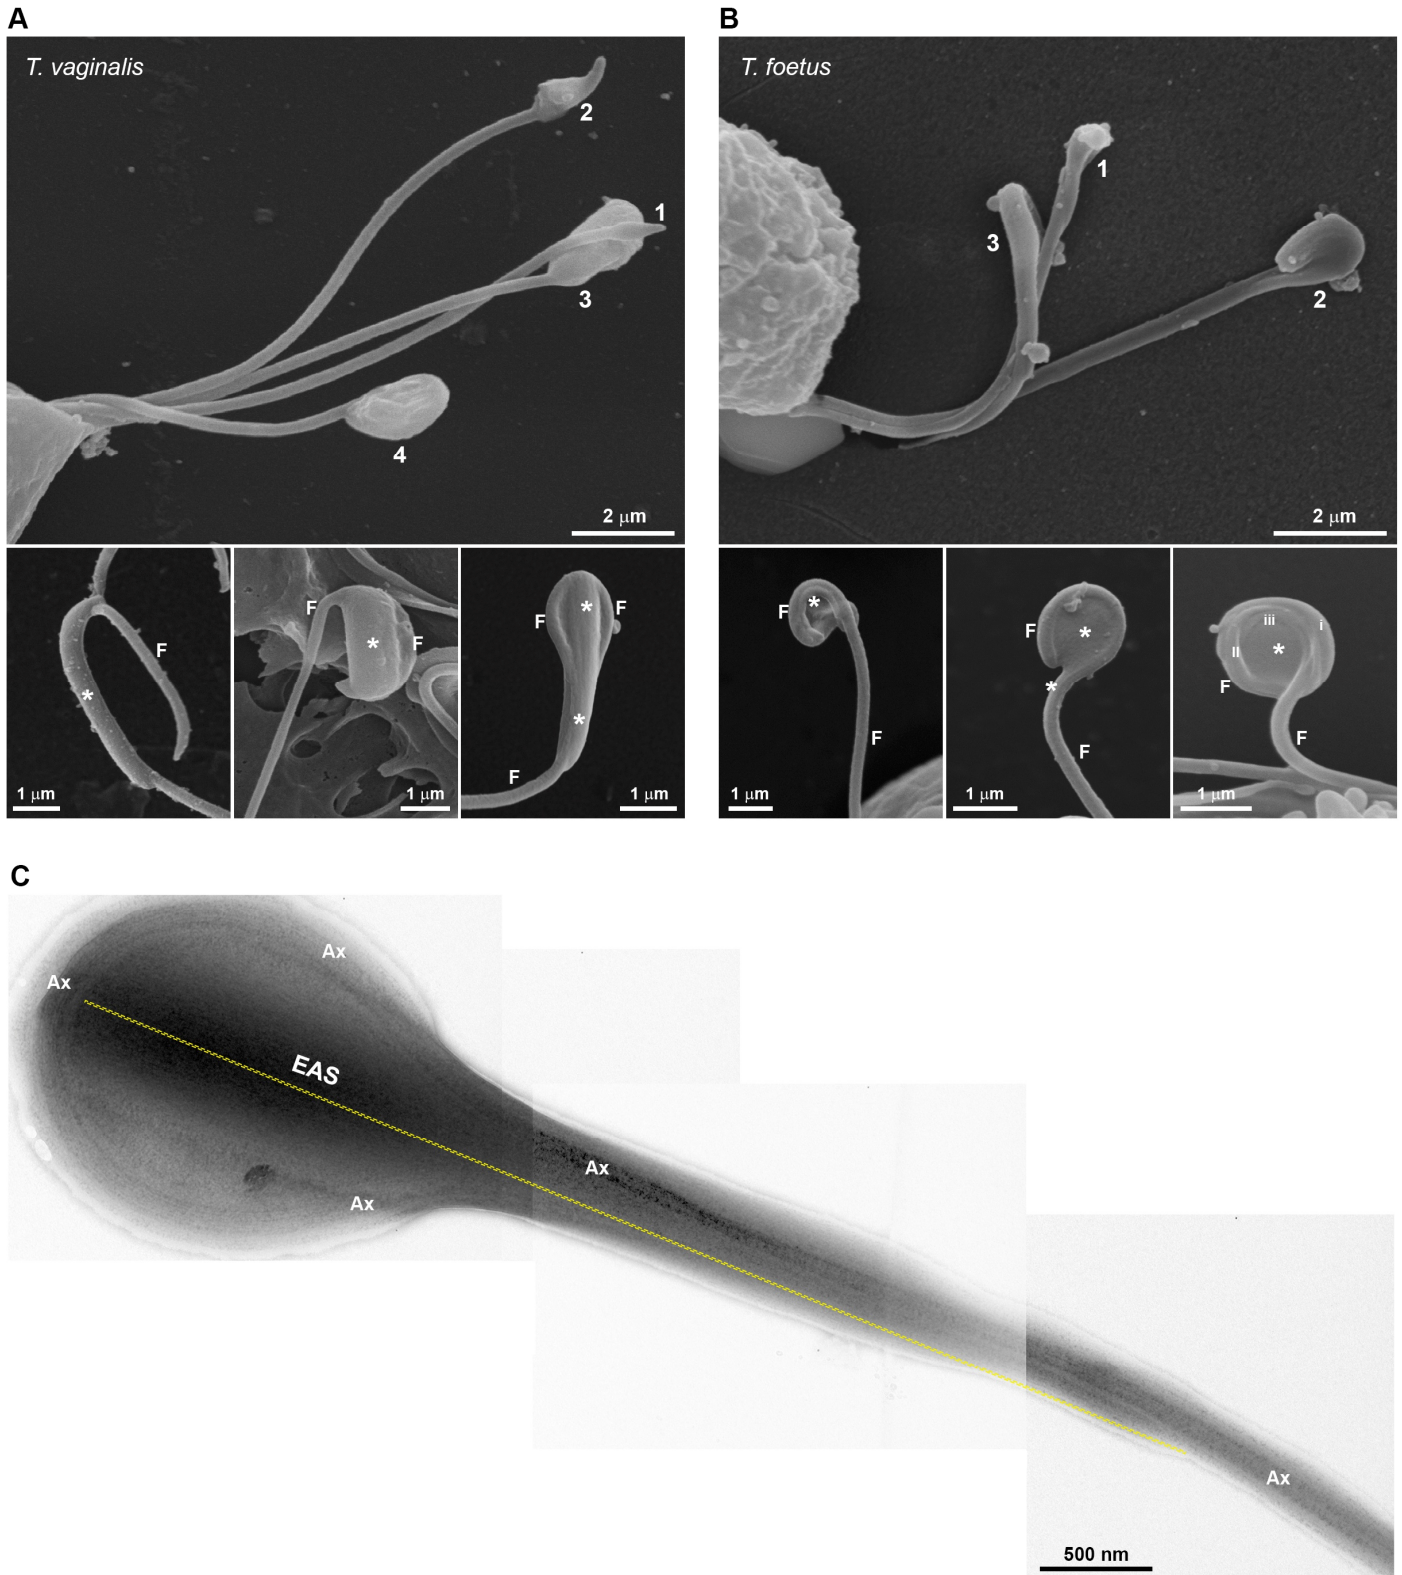

720 **Figure 5. Morphological diversity of flagellar swelling.** (A-B) SEM showing swellings (\*) of  
721 different sizes in *T. vaginalis* (A) and *T. foetus* (B). The numbers 1, 2, 3 and 4 and images  
722 suggest plausible stages for the spoon shaped structure formation. In (B), the roman numbers  
723 (i, ii and iii) indicate the amount of flagellum (F) folds around the swelling. (C) Negative staining  
724 of a sausage shaped extra-axonemal structure (EAS) surrounding by axoneme (Ax).

725 **Figure 6**

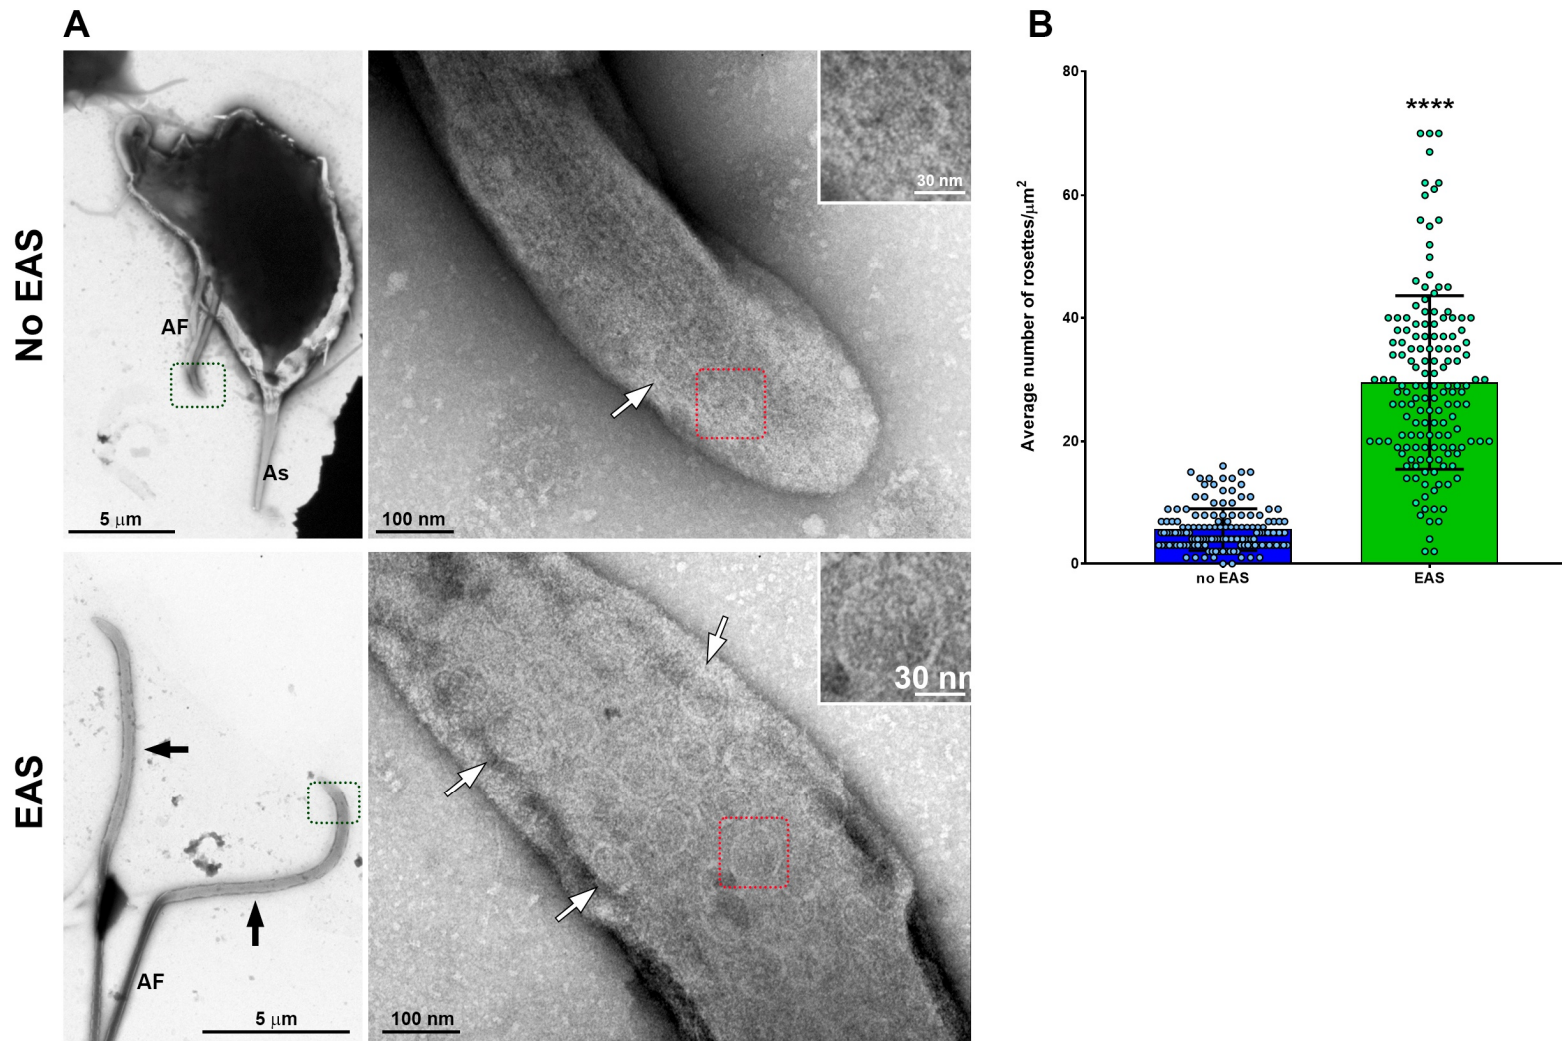

726 **Figure 6. Flagella with swelling exhibit a higher number of rosette-like formations. (A)**  
727 Representative general and detailed views of *T. vaginalis* anterior flagella (AF) without and  
728 extra-axonemal structures (EAS) obtained by TEM. Many rosette-like formations (white arrows)  
729 are seen in the flagella with swelling (black arrows). As, axostyle. **(B)** Quantification of the  
730 number of rosettes/ $\mu\text{m}^2$ . The columns represent the average number of rosettes/ $\mu\text{m}^2 \pm$  the  
731 standard deviation (SD) of three independent experiments. 50 flagella with or without swellings  
732 per sample were randomly counted using TEM. The dots indicate the values obtained for each  
733 flagellum. Flagella with EAS show a higher number of rosettes/ $\mu\text{m}^2$  than those flagella without  
734 EAS. \*\*\*\*  $p < 0.0001$  compared to “no-EAS” group using non-parametric t-test (Mann-Whitney  
735 test).

736 **Figure 7**

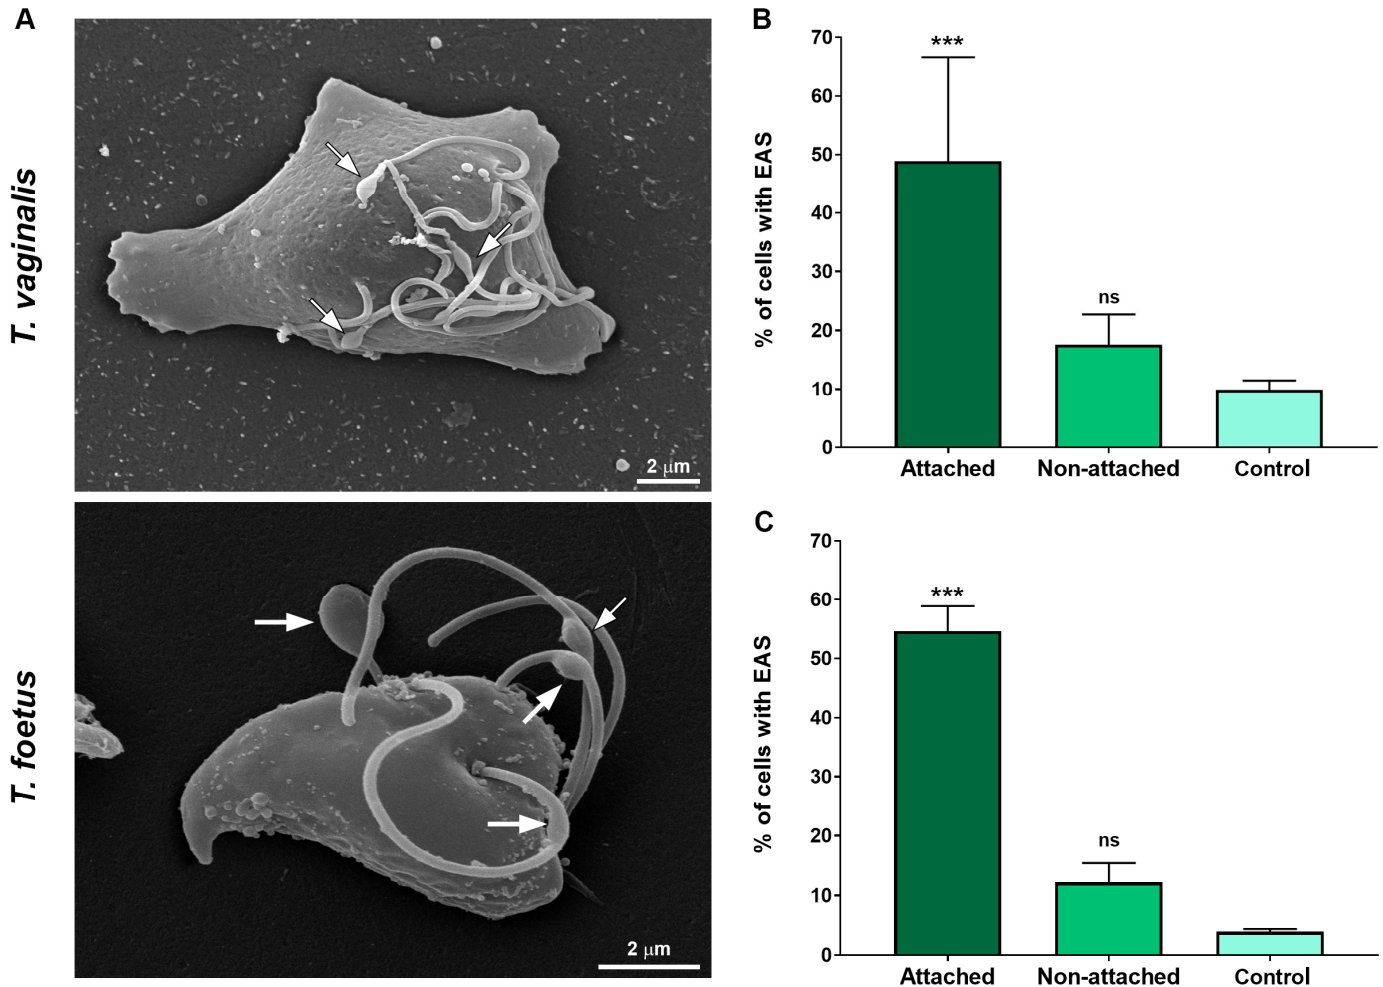

737 **Figure 7. The EASs formation increase during trichomonads attachment on Fibronectin-**  
738 **coated coverslips. (A)** SEM of *T. vaginalis* and *T. foetus* after adhesion assay on fibronectin-  
739 coated coverslips. Arrows indicate the extra-axonemal structures (EAS). Notice that parasites  
740 display an amoeboid morphology. **(B-C)** Quantitative analyses in *T. vaginalis* **(B)** and *T. foetus*  
741 **(C)**. The percentage of cells with EASs was determined by counting of 500 parasites per sample  
742 using SEM. Data are expressed as means of three independent experiments in duplicate  $\pm$  SD.  
743 Attached and non-attached: parasites resuspended in PBS incubated on fibronectin-coated  
744 coverslips in humidity chamber for 2 h at 37°C and rigorously washed with PBS to remove non-  
745 attached cells. Attached parasites remain on the coverslips even after several washes. Non-  
746 attached parasites were collected with a pipette, harvested by centrifugation, and prepared for  
747 SEM. Control, parasites incubated on uncovered coverslips under the same conditions  
748 mentioned above, collected with a pipette, harvested by centrifugation, and prepared for SEM.  
749 “Control” is formed by non-adherent, suspended cells from uncovered coverslips, whereas non-  
750 adherent parasites from fibronectin are called “Non-attached”. The percentage of parasites  
751 displaying EASs is significantly higher in Attached group when compared to Non-attached and  
752 control groups. \*\*\* $p < 0.001$  compared to control group using One-Way ANOVA test (Kruskal-  
753 Wallis test; Dunn’s multiple comparisons test). ns, non-significant.

754 **Figure 8**

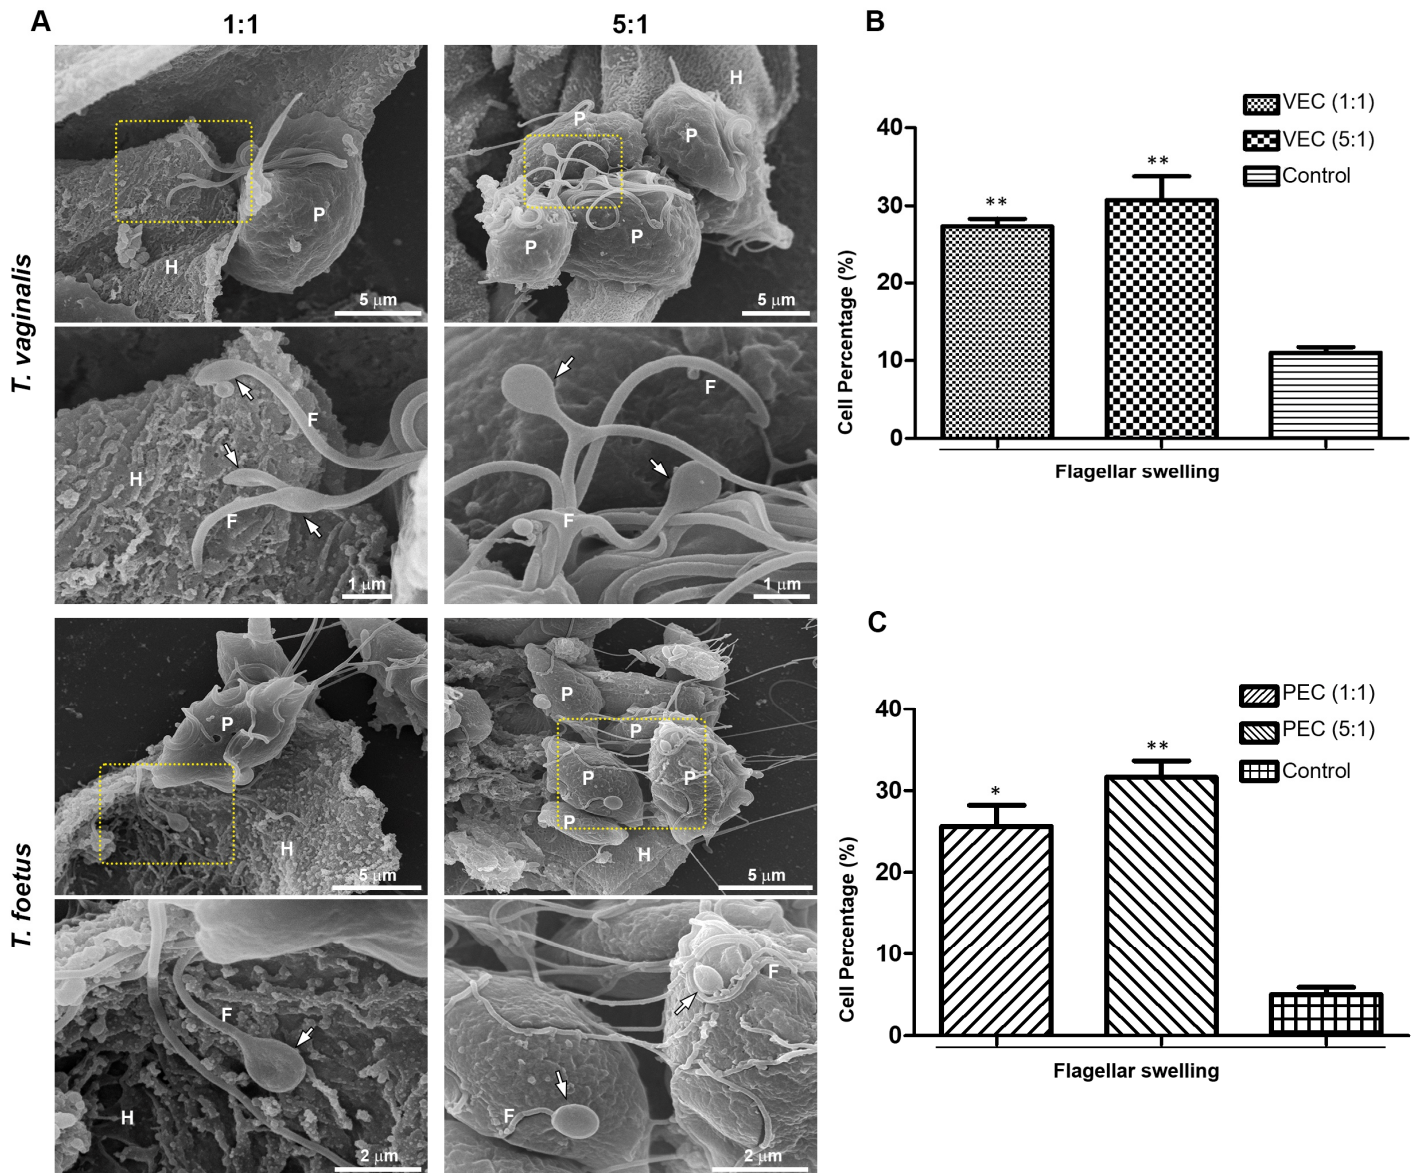

755 **Figure 8. EASs are formed in response to host cell exposure.** (A) Representative SEM  
 756 images of *T. vaginalis* and *T. foetus* after host cell interaction. Human vaginal epithelial cell  
 757 (VECs) and bovine preputial epithelial cell (PECs) were co-incubated with *T. vaginalis* and *T.*  
 758 *foetus*, respectively, at cell ratios of 1:1 or 5:1 parasite:host cell in PBS-F (PBS with 1% FBS at  
 759 pH 6.5) at 37°C for 30 min. Flagellar swelling (arrows) are seen in some parasites (P). Notice  
 760 the swellings in direct contact to the host cells (H) in the images of 1:1 ratio. (B-C) Quantification  
 761 of the percentage of *T. vaginalis* (B) and *T. foetus* (C) with flagellar swelling after the host cell  
 762 interaction. Three independent experiments in duplicate were performed and 500 parasites were  
 763 randomly counted per sample using SEM. Data are expressed as percentage of parasites  $\pm$  SD.  
 764 For the control experiments, parasites incubated in PBS in the absence of host cells were  
 765 analysed. The percentage of parasites with flagellar swelling increases after the host cell  
 766 exposure when compared to control (PBS). \*  $p < 0.05$ ; \*\*  $p < 0.01$  compared to control using One-  
 767 Way ANOVA test (Kruskal-Wallis test; Dunn's multiple comparisons test).

768 **Figure 9.**

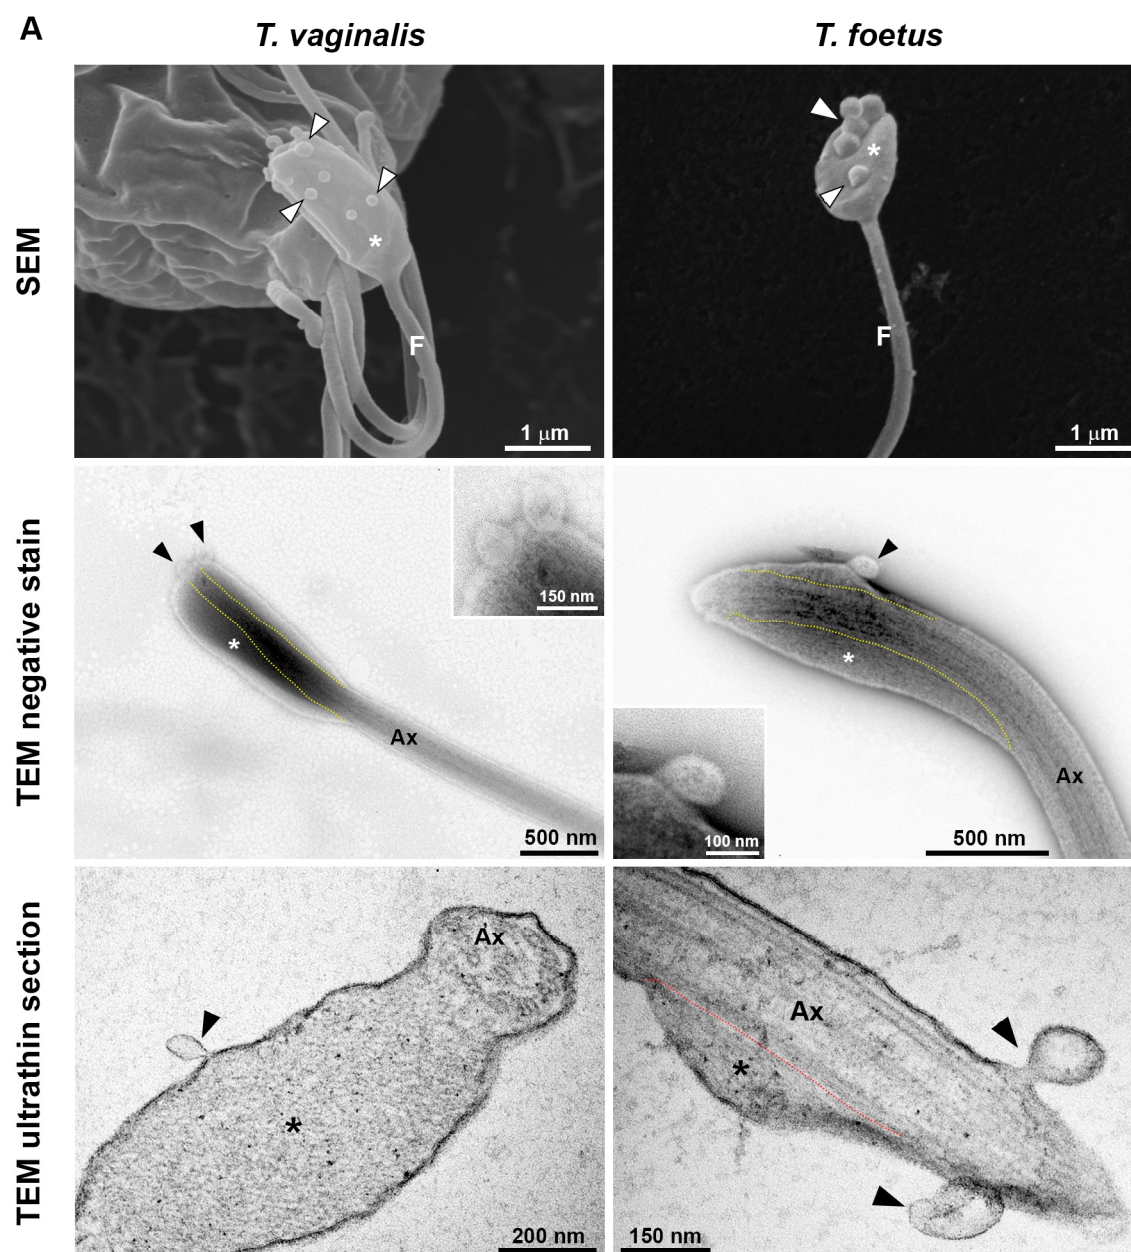

769 **Figure 9. EASs release microvesicles-like structures.** (A) Representative micrographs of  
770 MVs (arrowheads) protruding from the flagellar membrane of the EASs (\*) of *T. vaginalis* and *T.*  
771 *foetus*. The images were obtained by SEM (first row), negative staining (second row) and  
772 ultrathin sections (third row). The dotted lines indicate boundary between axoneme (Ax) and the  
773 extra-axonemal filaments (\*). (B) % of EASs with protruding MVs on their surface. Three  
774 independent experiments in duplicate were performed and 100 parasites exhibiting at least one  
775 swelling were randomly counted per sample using SEM. Data are expressed as means  $\pm$  SD.  
776 Approximately, 45% of parasites with flagellar swelling exhibited associated MVs.

777 **Figure 10**

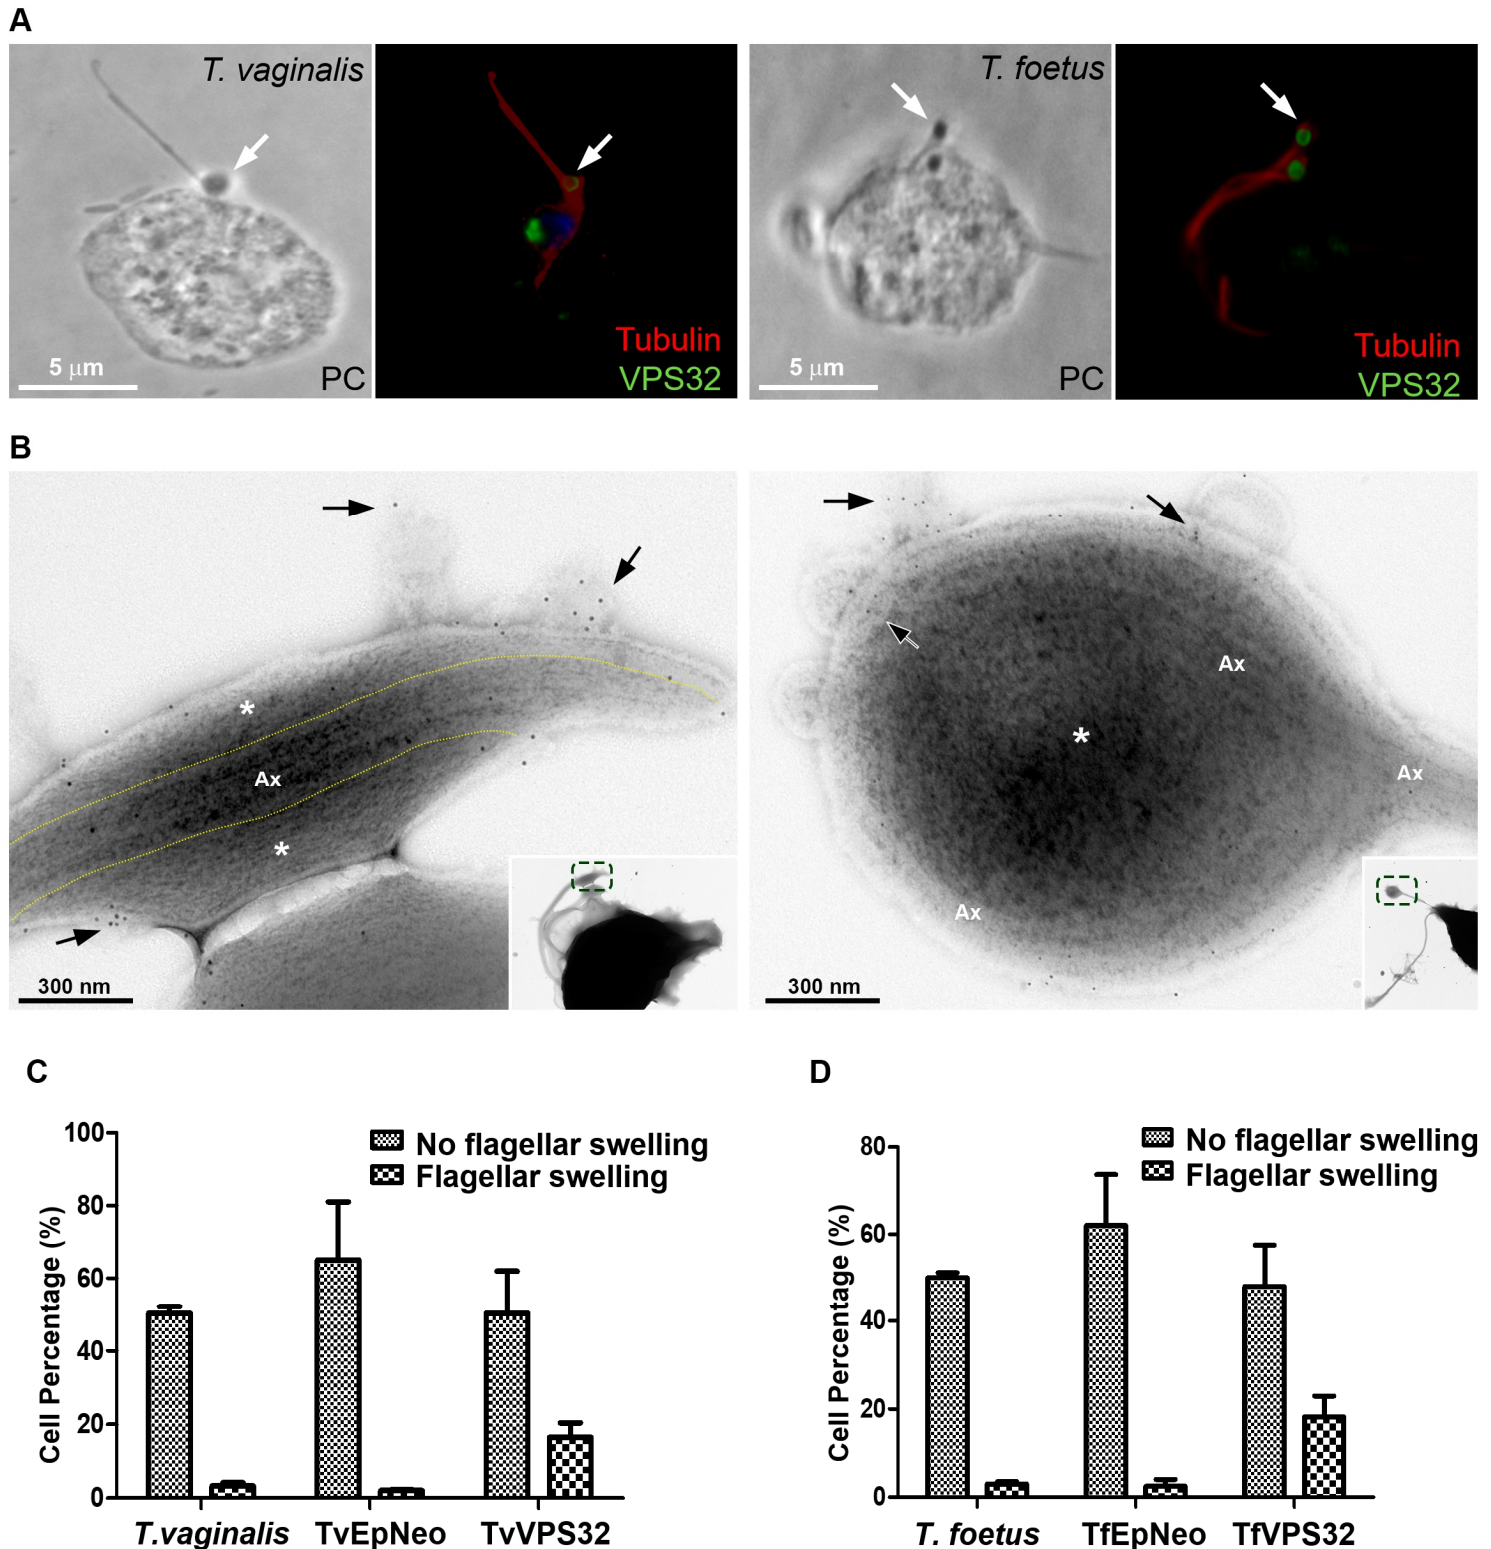

778 **Figure 10. VPS32 is present in EASs membrane, and VPS32 overexpression increase**  
 779 **EASs formation in *T. vaginalis* and *T. foetus*.** (A) Representative immunofluorescence  
 780 microscopy images. Cells exogenously expressing TvVPS32 and TfVPS32 with a C-terminal  
 781 haemagglutinin (HA) tag were stained for immunofluorescence microscopy using a rabbit anti-  
 782 HA antibody (green). PC, phase-contrast image. The nucleus (blue) was also stained with 4',6'-  
 783 diamidino-2-phenylindole (DAPI) and the flagella (red) was stained with mouse anti-tubulin



784 antibody. Arrows indicate the flagellar subcellular localization of VPS32 in parasites cultured in  
785 the absence of host cells. **(B)** Negative staining of TvVPS32-HA transfected parasites  
786 immunogold-labelled with anti-HA antibodies demonstrate that TvVPS32 is localized in the  
787 surface of extra-axonemal structures (EASs) as well as in MVs that protrudes from EASs  
788 (arrows). **(C)** Analysis of the percentage of EASs in flagella of TvVPS32FL and TfVPA32FL  
789 parasites. Three independent experiments in duplicate were performed and 100 parasites  
790 exhibiting at least one swelling were randomly counted per sample using phase contrast  
791 microscope. Data are expressed as means  $\pm$  SD. Approximately, 15% and 18% of flagellar  
792 EASs were observed in TvVPS32 and TfVPS32 transfected parasites, respectively compared to  
793 5% of EASs observed in EpNeo parasites.

794 **Figure 11**

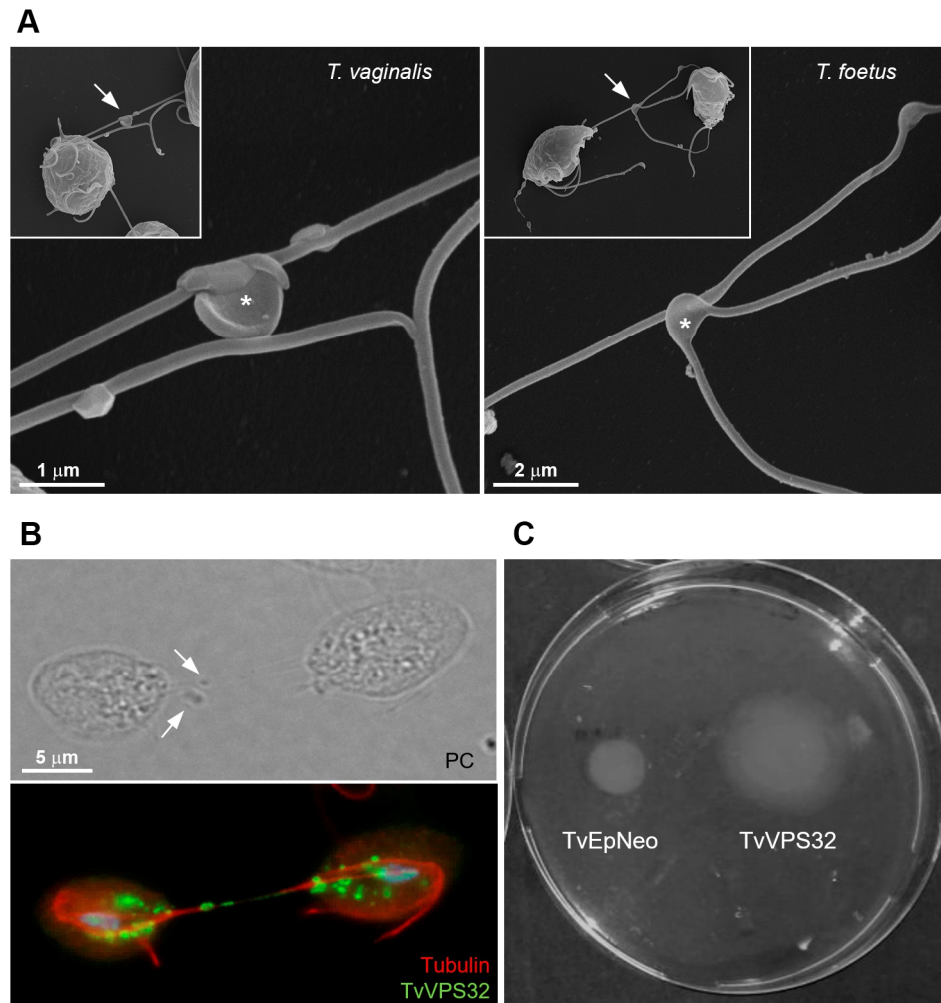

795

796 **Figure 11. TvVPS32 plays a role in parasite motility.** (A) Representative SEM images of  
797 parasites (*T. vaginalis* and *T. foetus*) connected to themselves by EASs (arrows). Notice the  
798 EASs in flagella that connect two parasites (\*). (B) Immunofluorescence images showing that  
799 TvVPS32 transfected parasites connect each other through the flagella and that TvVPS32 is  
800 localized in the flagella of parasites in contact. TvVPS32 parasites cultured in the absence of  
801 host cells were co-stained with anti-HA (green) and tubulin (red). The nucleus (blue) was also  
802 stained with DAPI. Arrows indicate the EASs PC, phase-contrast image. (C) Representative  
803 TvVPS32 parasites motility assay. TvEpNeo and TvVPS32 parasites were spotted onto soft agar  
804 and their migration capacity was analyzed by measuring the size of the halo diameter during 4  
805 days under microaerophilic conditions at 37°C. TvVPS32 parasites showed a higher capacity of  
806 migration compared to TvEpNeo parasites.

807 **Supplementary Figure S1**

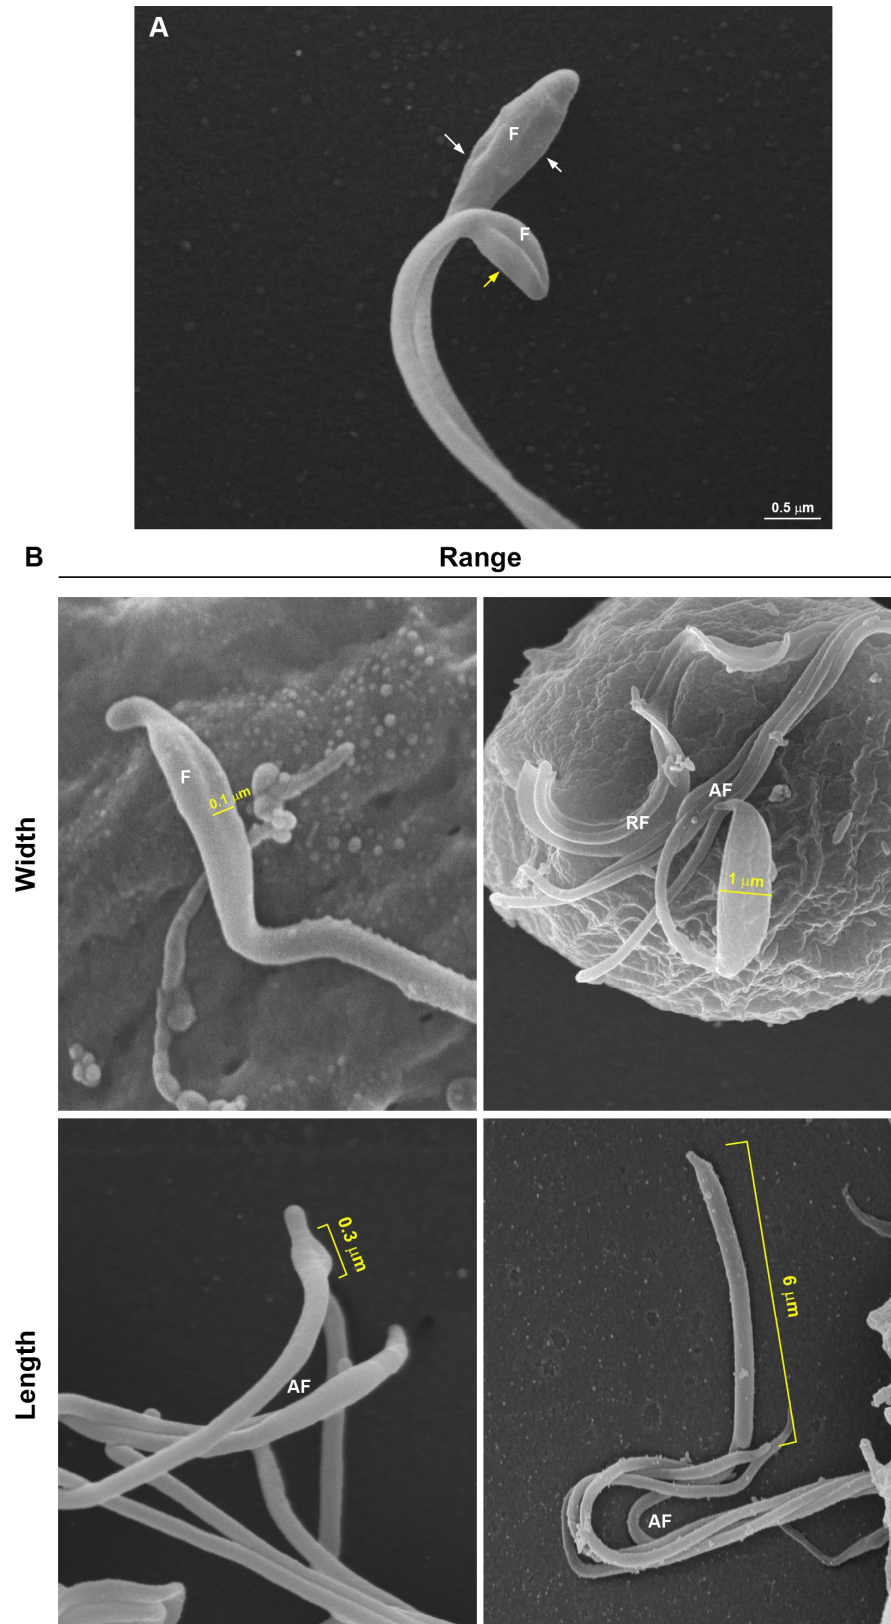

808 **S1 Figure. SEM of flagellar “sausage-like” swelling in *T. vaginalis*.** (A) The swellings can  
809 be seen laterally (yellow arrow) to or surrounding (white arrows) the flagellum. (B) The swellings  
810 display a range size from 0.1 to 1 μm in thickness and a length from 0.3 to 6 μm. AF, anterior  
811 flagella; RF, recurrent flagellum.

812 **Supplementary Figure S2**

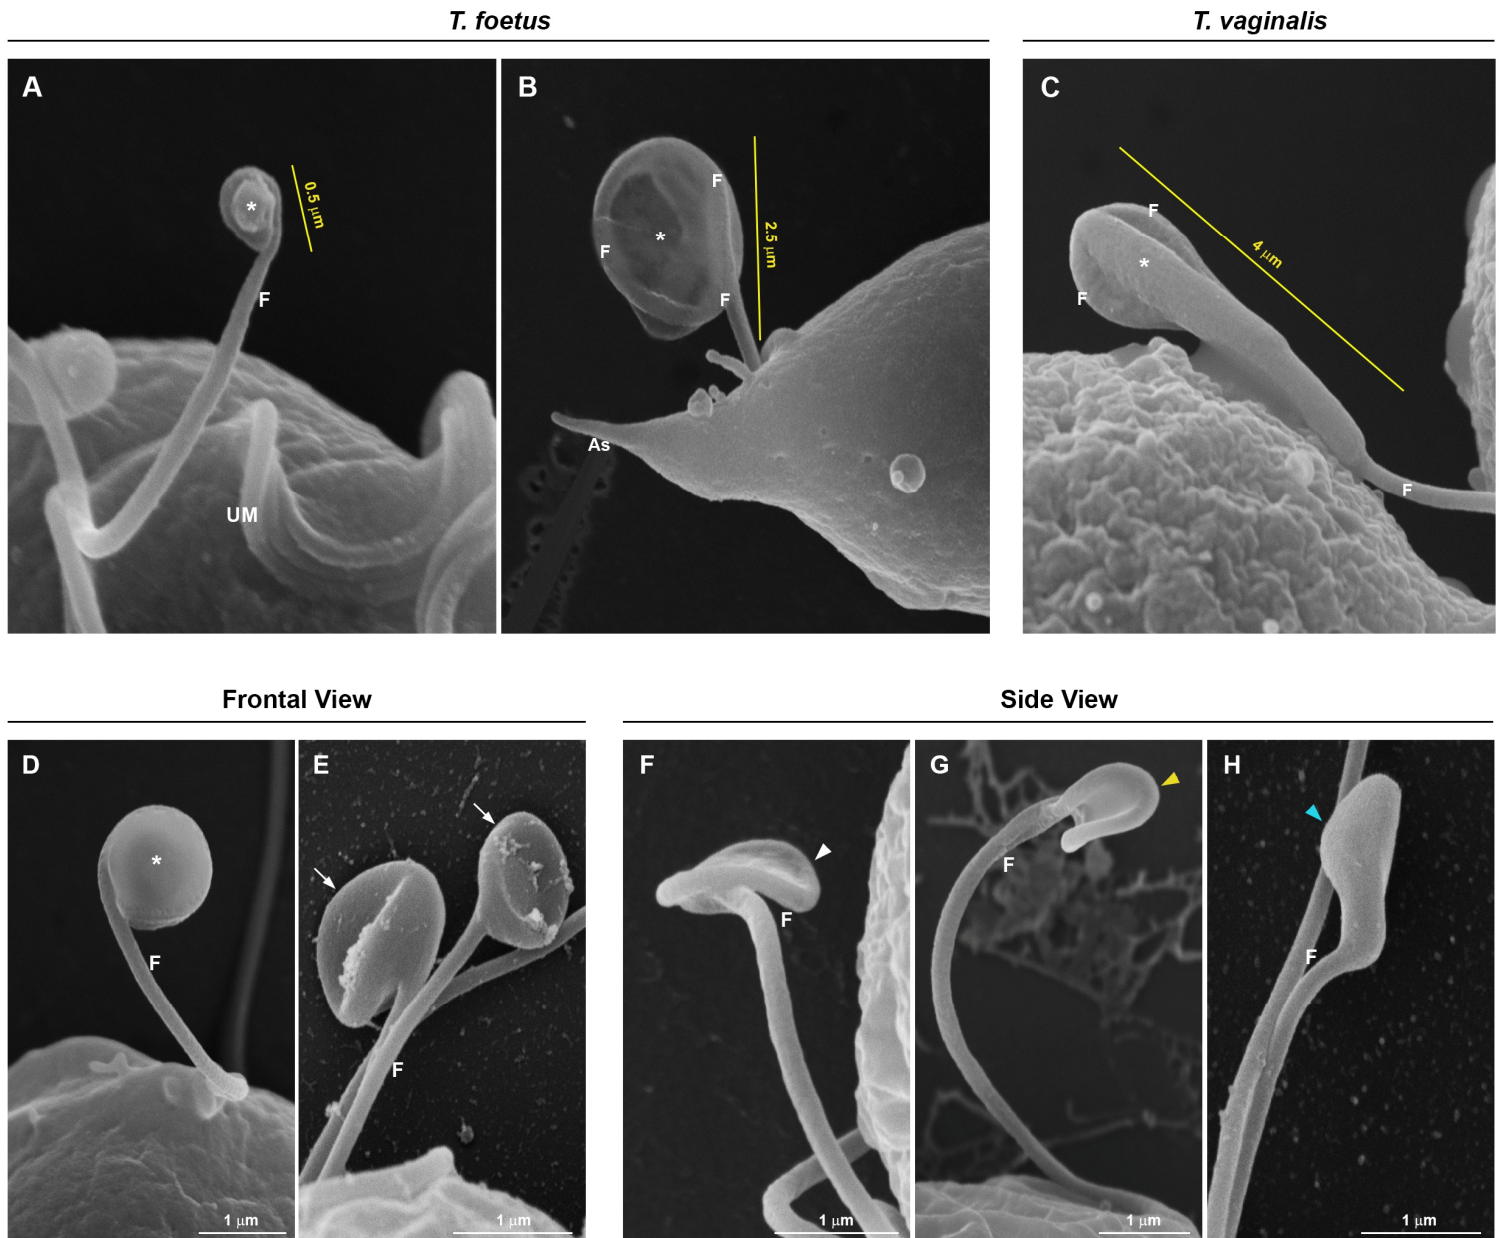

813 **S2 Figure. SEM of flagellar “spoon-like” swelling.** The flagellum (F) folds around the swelling  
814 (\*), forming a rounded or ellipsoid structure with a range size from 0.5 to 2.5 μm in the major axis  
815 in *T. foetus* (A-B) and more than 4 μm long in *T. vaginalis* (C). (D-E) Frontal views. The “spoon-  
816 like” structure exhibits a flattened (D) or concave (arrows) surface (E). (F-H) Side views. The  
817 structure (arrowheads) displays an aligned (F), curved (G), or convex (H) appearance.

818 **Supplementary Figure S3**

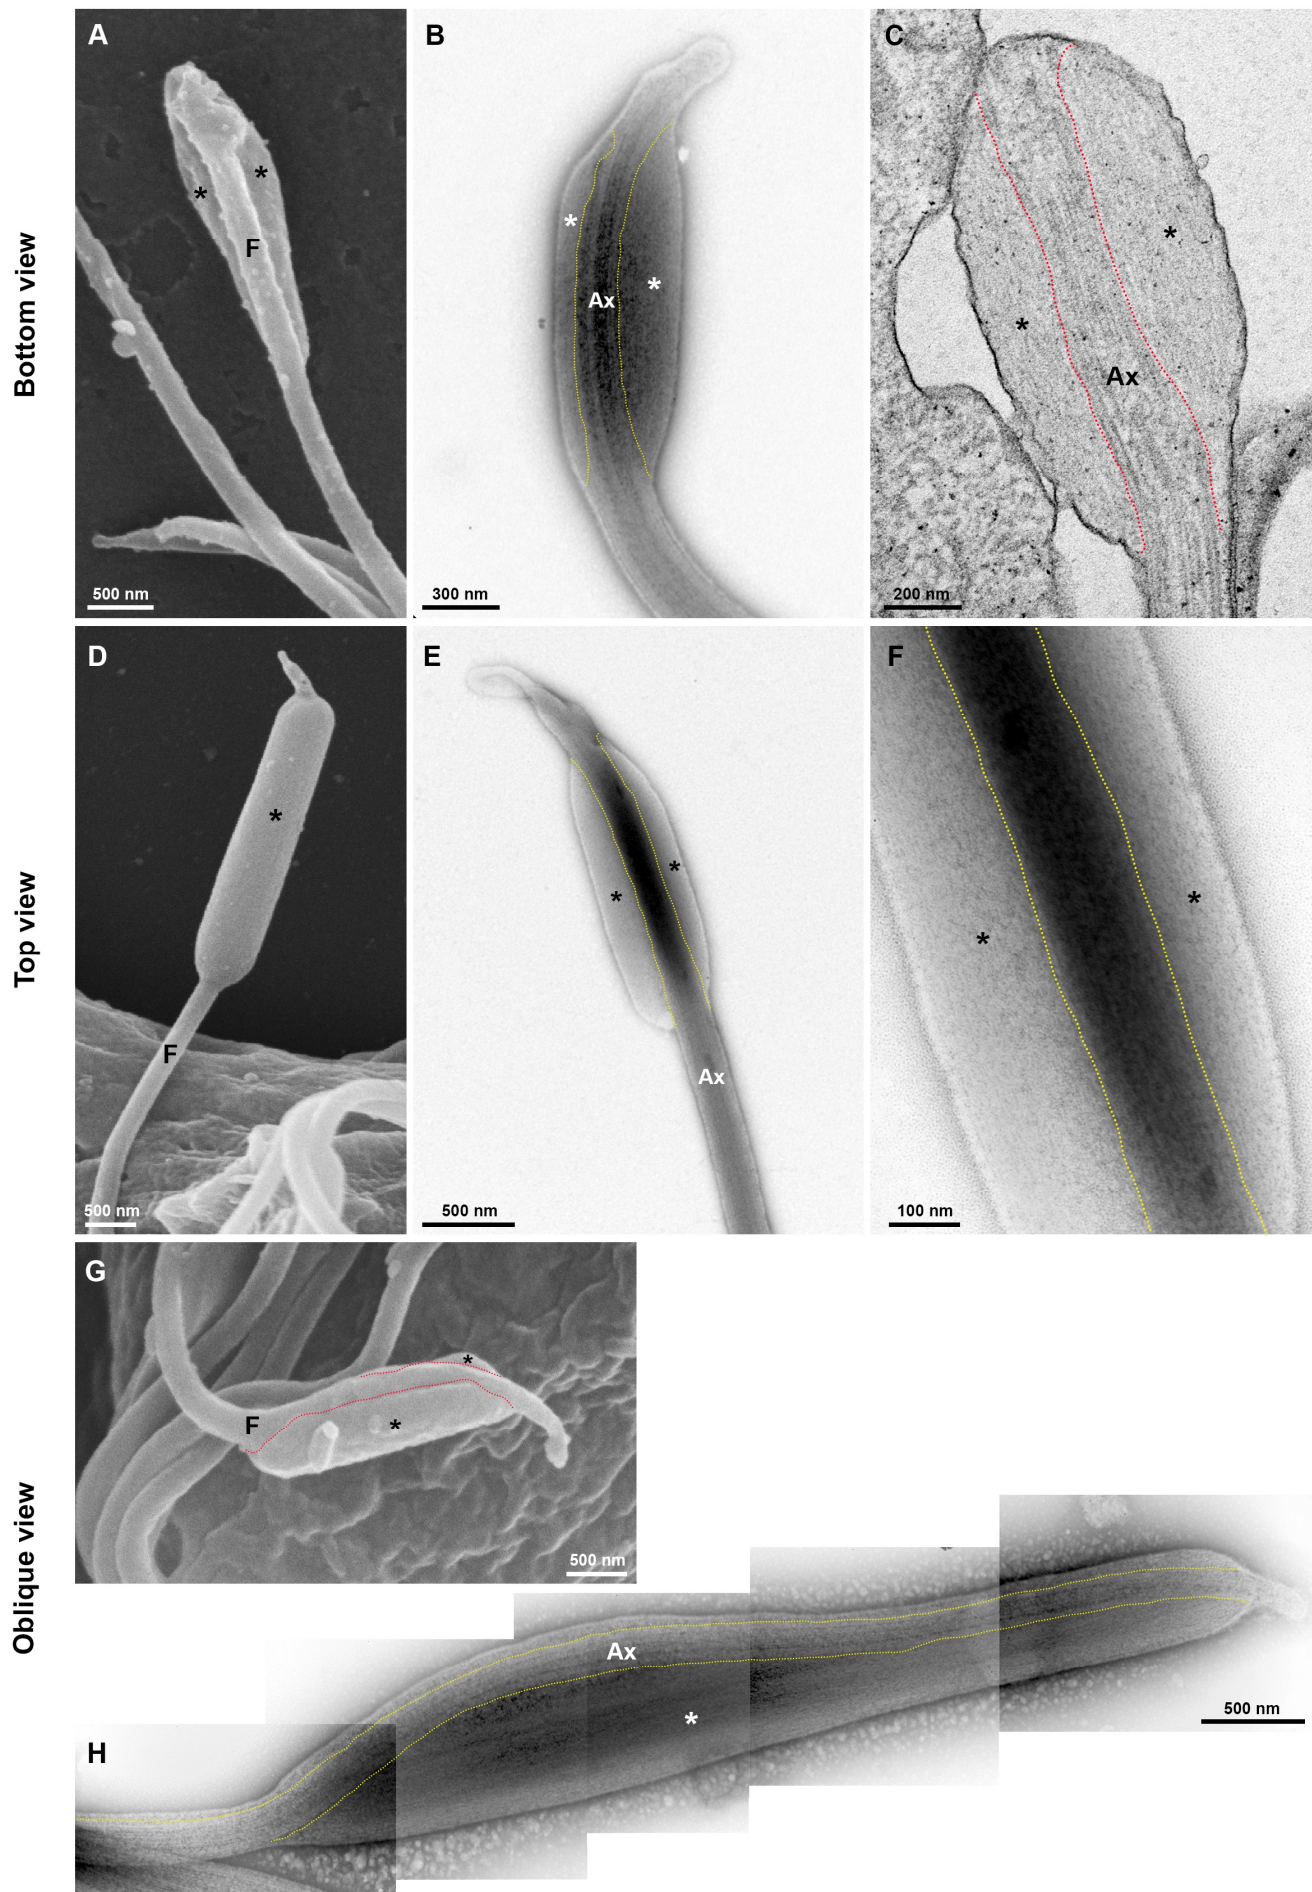

819 **S3 Figure. Ultrastructure of the sausage shaped swelling at the tip of *T. vaginalis* flagella**  
820 **seen by different perspectives.** First row, SEM (**A**), negative staining (**B**) and ultrathin section  
821 (**C**) of swellings in a bottom view. Second row, SEM (**D**) and negative staining (**E-F**) of structure  
822 in a top view. Third row, SEM (**G**) and negative staining (**H**) of swelling in an oblique view. The  
823 dotted lines indicate boundary between axoneme (Ax) and the extra-axonemal filaments (\*). In  
824 a SEM bottom view (**A**), notice that swelling (\*) partially surround the flagellum (F), whereas in a  
825 top view (**D**) seems that the flagellum is totally surrounded by the swelling. In an oblique view  
826 (**G-H**), observe that the axoneme is in a slit of the swelling.

827 **Supplementary Figure S4**

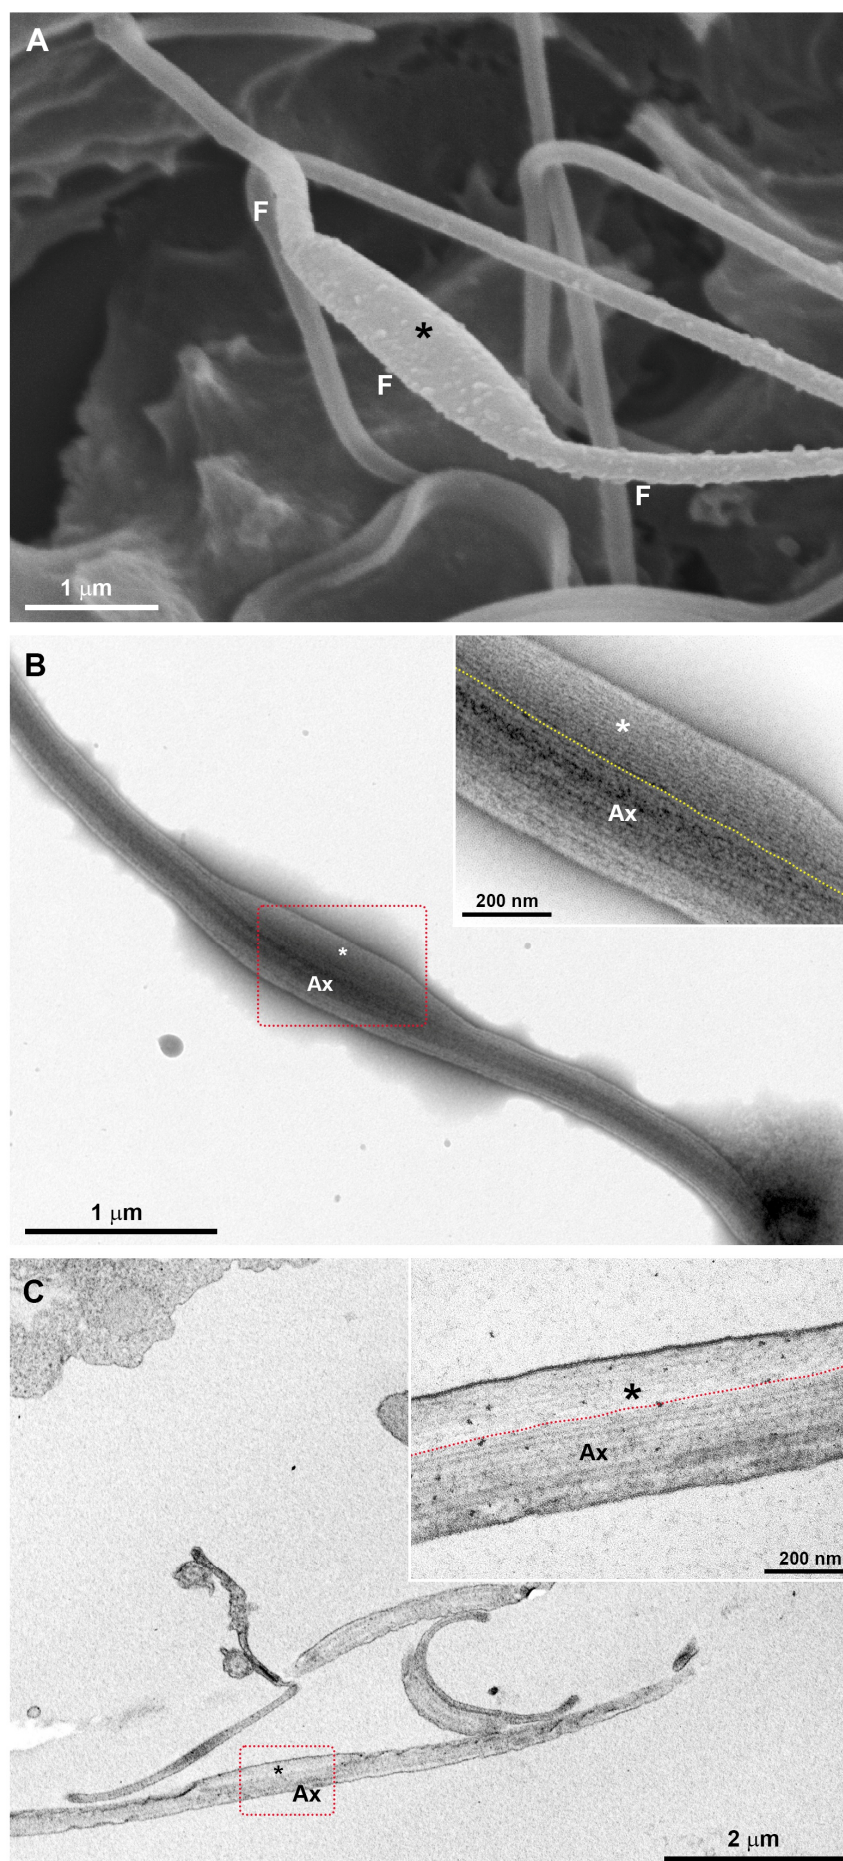

828 **S4 Figure. Fine structure of the “sausage-like” swelling in the middle of *T. vaginalis***  
829 **flagella. (A) SEM. (B) Negative staining. (C) Ultrathin section. (B-C) The structure is formed by**  
830 **thin extra-axonemal filaments (\*) that run longitudinally along the axoneme (Ax). The dotted lines**  
831 **indicate boundary between axoneme and the extra-axonemal filaments. F, flagellum.**



832 **Supplementary Figure S5**

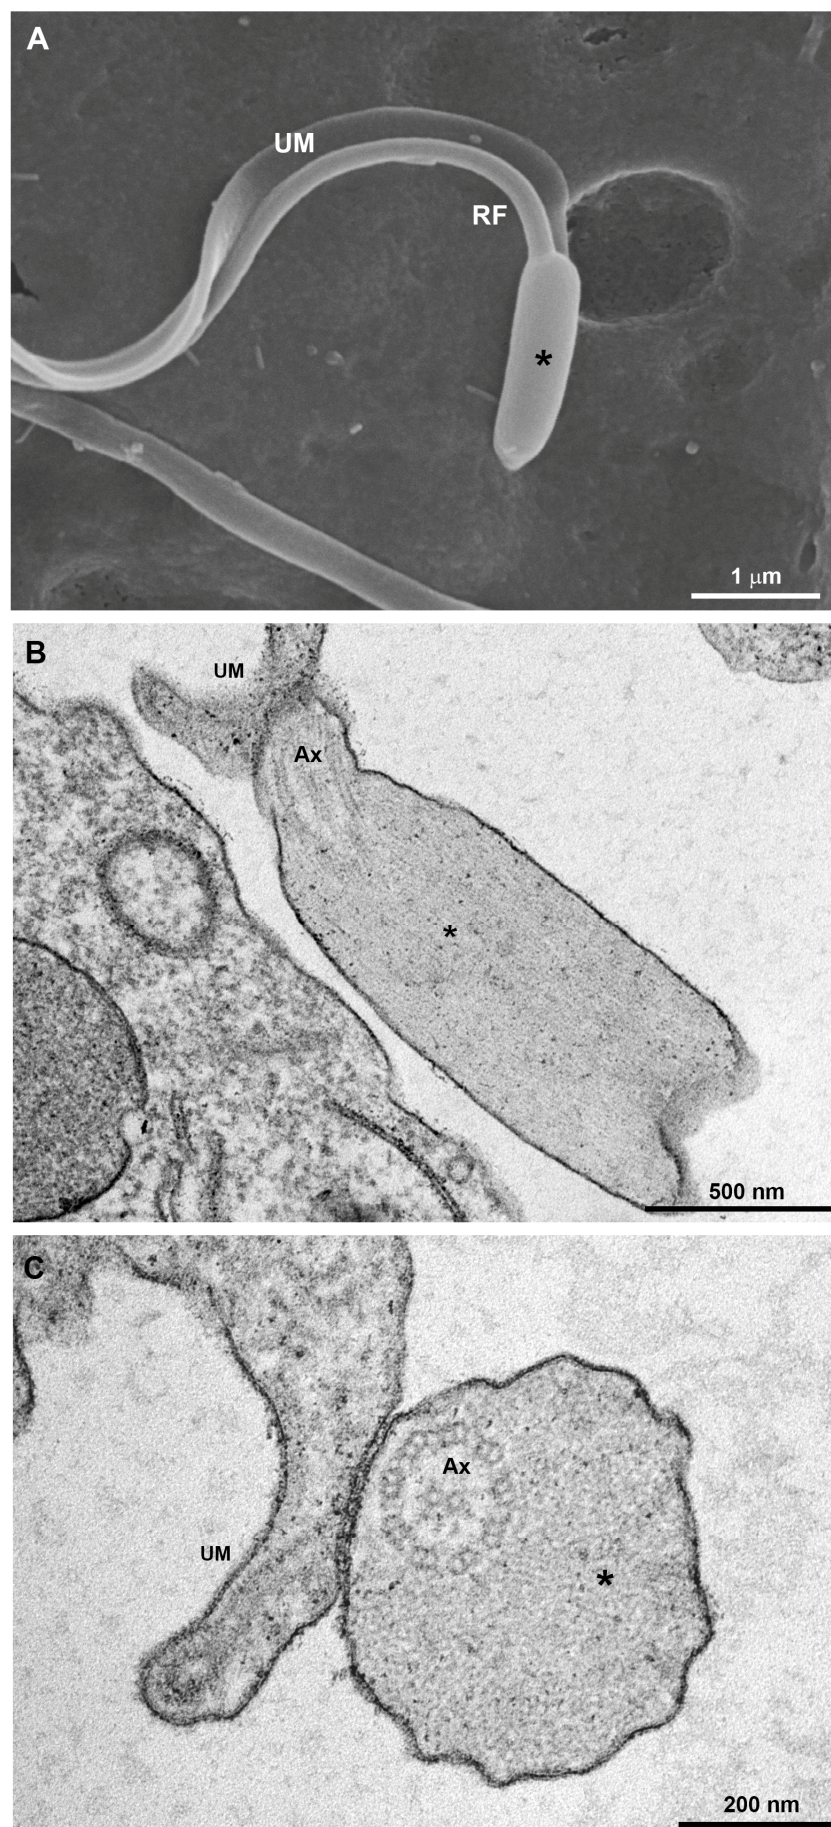

833 **S5 Figure. Ultrastructure of the sausage shaped swelling at the tip of *T. vaginalis***  
834 **recurrent flagellum. (A) SEM. (B) Transversal and (C) cross sections. (B-C) The structure is**  
835 **formed by thin extra-axonemal filaments (\*). RF, recurrent flagellum; UM, undulating membrane;**  
836 **Ax, axoneme.**

837 **Supplementary Figure S6**

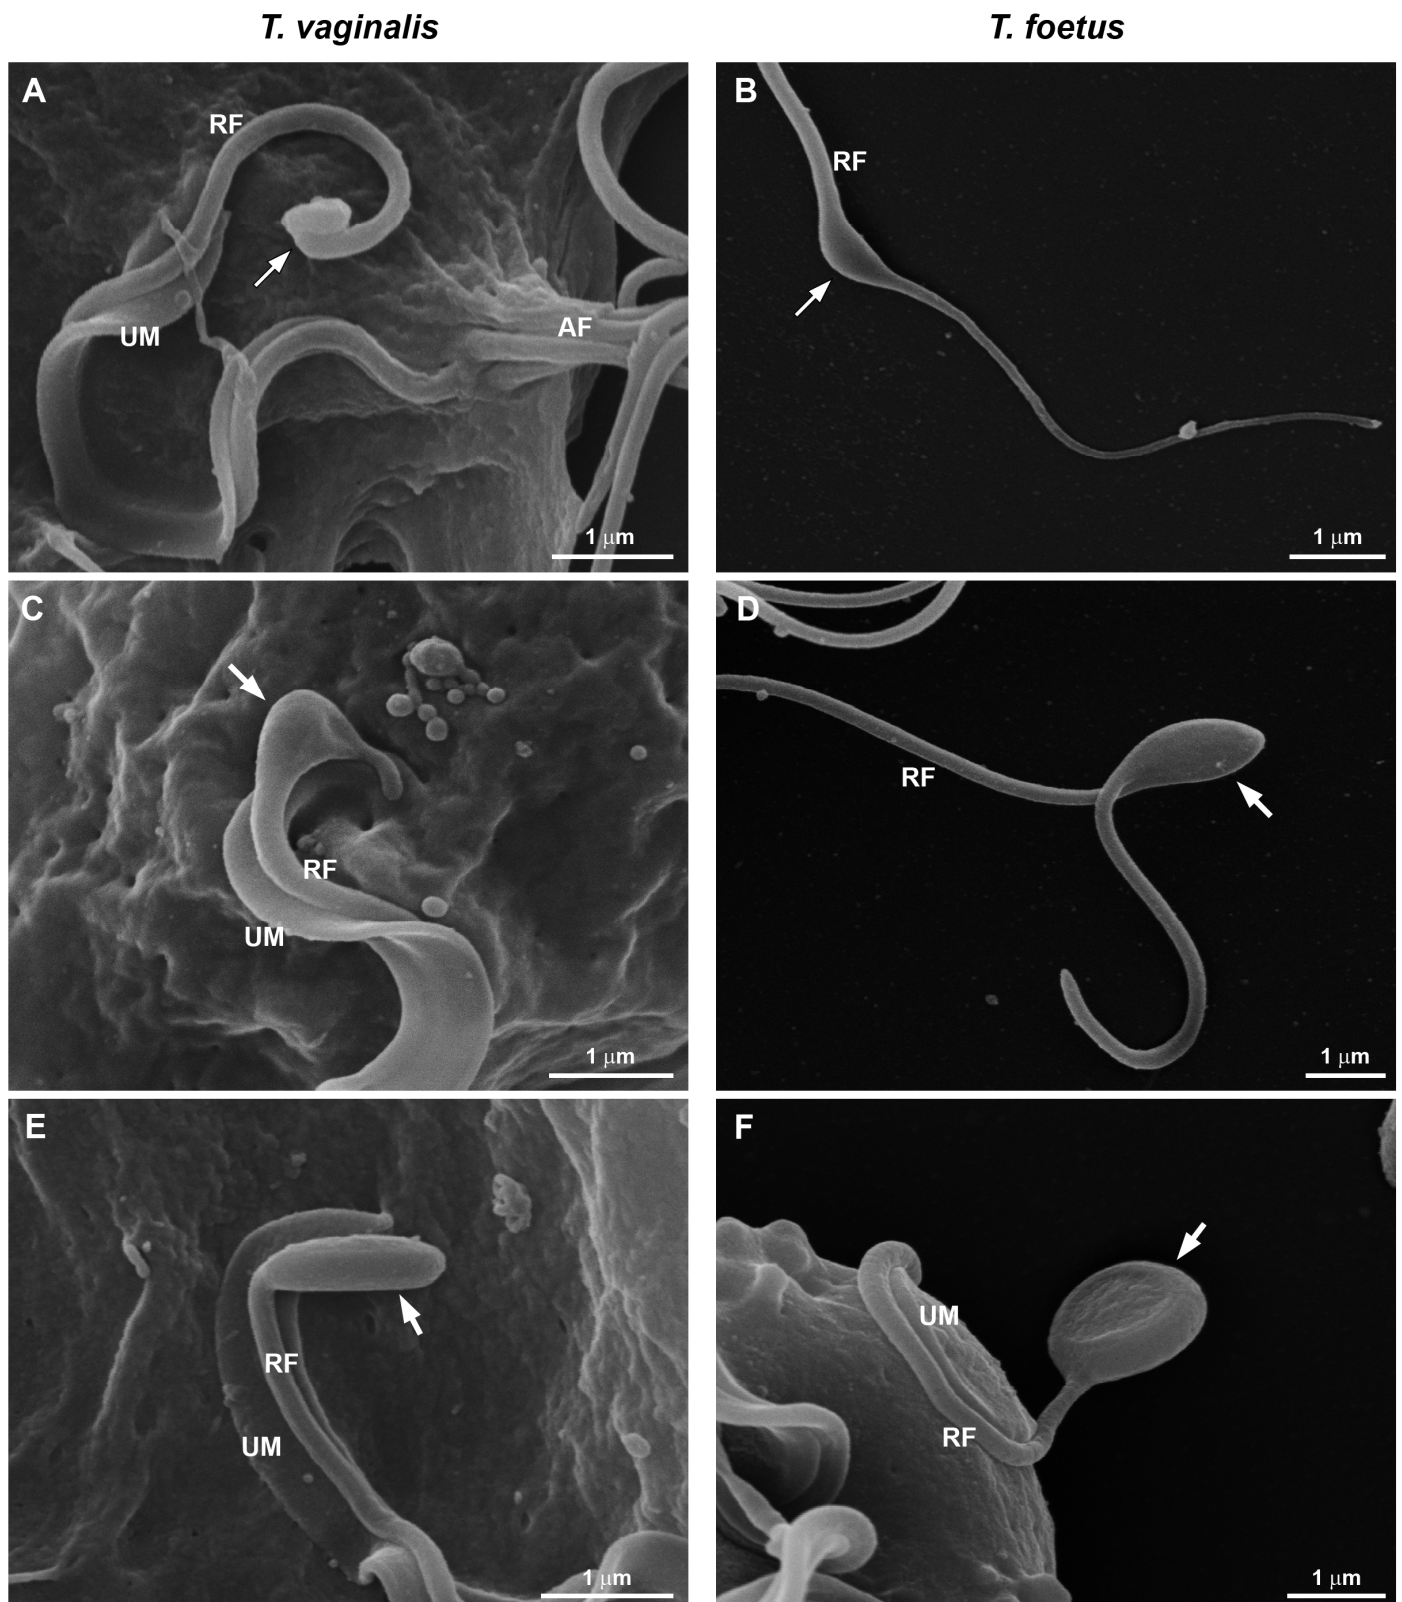

838 **S6 Figure. SEM of flagellar swellings in the recurrent flagellum (RF) of *T. vaginalis* (A, C,**  
839 **E) and *T. foetus* (B, D, F). Notice that the *T. vaginalis*-RF has no free portion and exhibits**  
840 **sausage shaped swellings (arrows) of different sizes. Both sausage (B) and spoon (D, F) shaped**  
841 **swellings are seen in the free tip of *T. foetus*-RF. UM, undulating membrane.**

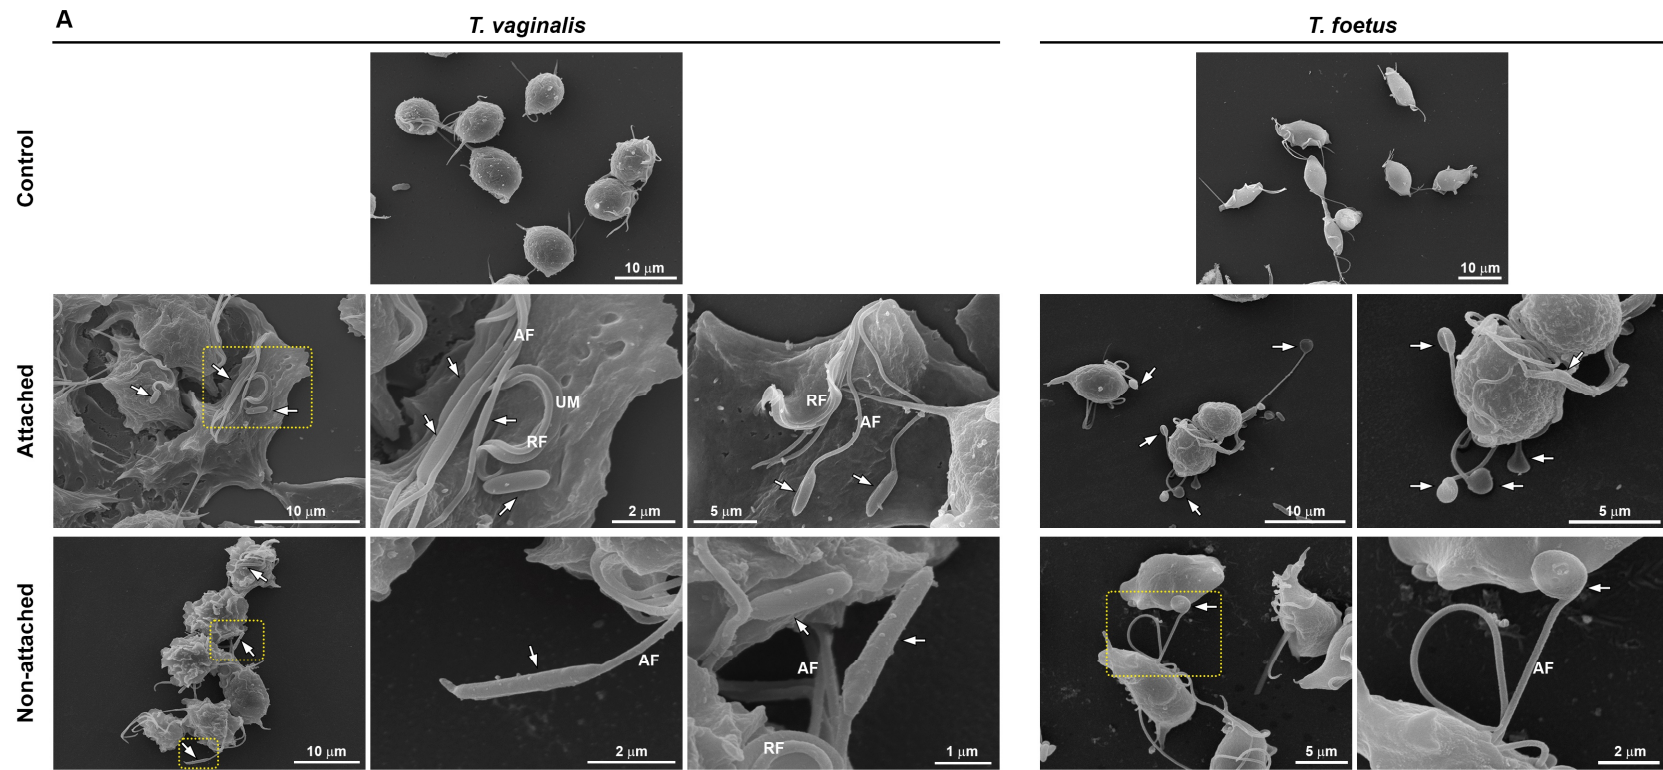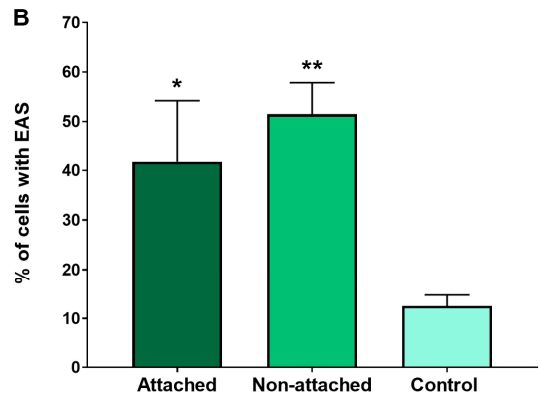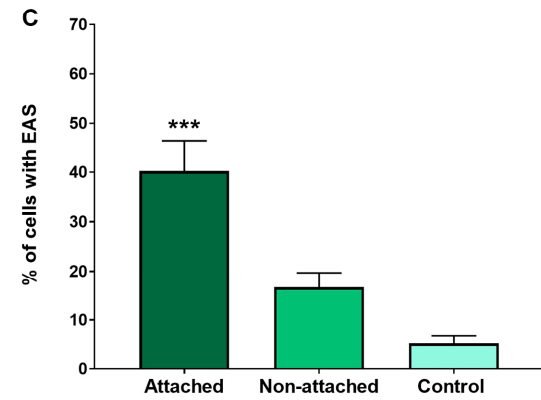

843 **S7 Figure. The EASs formation increase during trichomonads attachment on Alcian blue-coated coverslips. (A)** Representative SEM  
844 micrographs of *T. vaginalis* and *T. foetus* after the adhesion assay. Control: parasites incubated on uncovered coverslips in humidity chamber for 0.5 h  
845 at 37°C, collected with a pipette, harvested by centrifugation, and prepared for SEM; Attached and non-attached: parasites incubated on 1% Alcian  
846 blue-coated glass coverslips in humidity chamber for 0.5 h at 37°C and rigorously washed with PBS to remove non-attached cells. Attached parasites  
847 remain on the coverslips even after several washes. Non-attached parasites were collected with a pipette, harvested by centrifugation, and prepared  
848 for SEM. “Control” is formed by non-adherent, suspended cells from uncovered coverslips, whereas non-adherent parasites from fibronectin are called  
849 “Non-attached”. In Control, the parasites display the typical pyriform cell body and no cell clusters. In Attached and Non-attached group, the cells are  
850 clustered, exhibiting an amoeboid or ellipsoid form and many flagellar swellings (arrows). AF, anterior flagella; RF, recurrent flagellum; UM, undulating  
851 membrane. **(B-C)** Quantitative analysis of the percentage of *T. vaginalis* **(B)** and *T. foetus* **(C)** with and without swelling after the adhesion assay. Three  
852 independent experiments in duplicate were performed and 500 parasites were randomly counted per sample using SEM. Data are expressed as  
853 percentage of parasites  $\pm$  SD. The percentage of parasites displaying flagellar swelling in the Alcian blue-attached group is higher s when compared to  
854 control. Unexpectedly, the percentage of *T. vaginalis* with EAS in the Alcian blue-Non-attached group was significantly higher when compared to control.  
855 \*  $p < 0.05$ ; \*\*  $p < 0.01$ ; \*\*\*  $p < 0.001$  compared to control using One-Way ANOVA test (Kruskal-Wallis test; Dunn’s multiple comparisons test).

856 **Supplementary Figure S8**

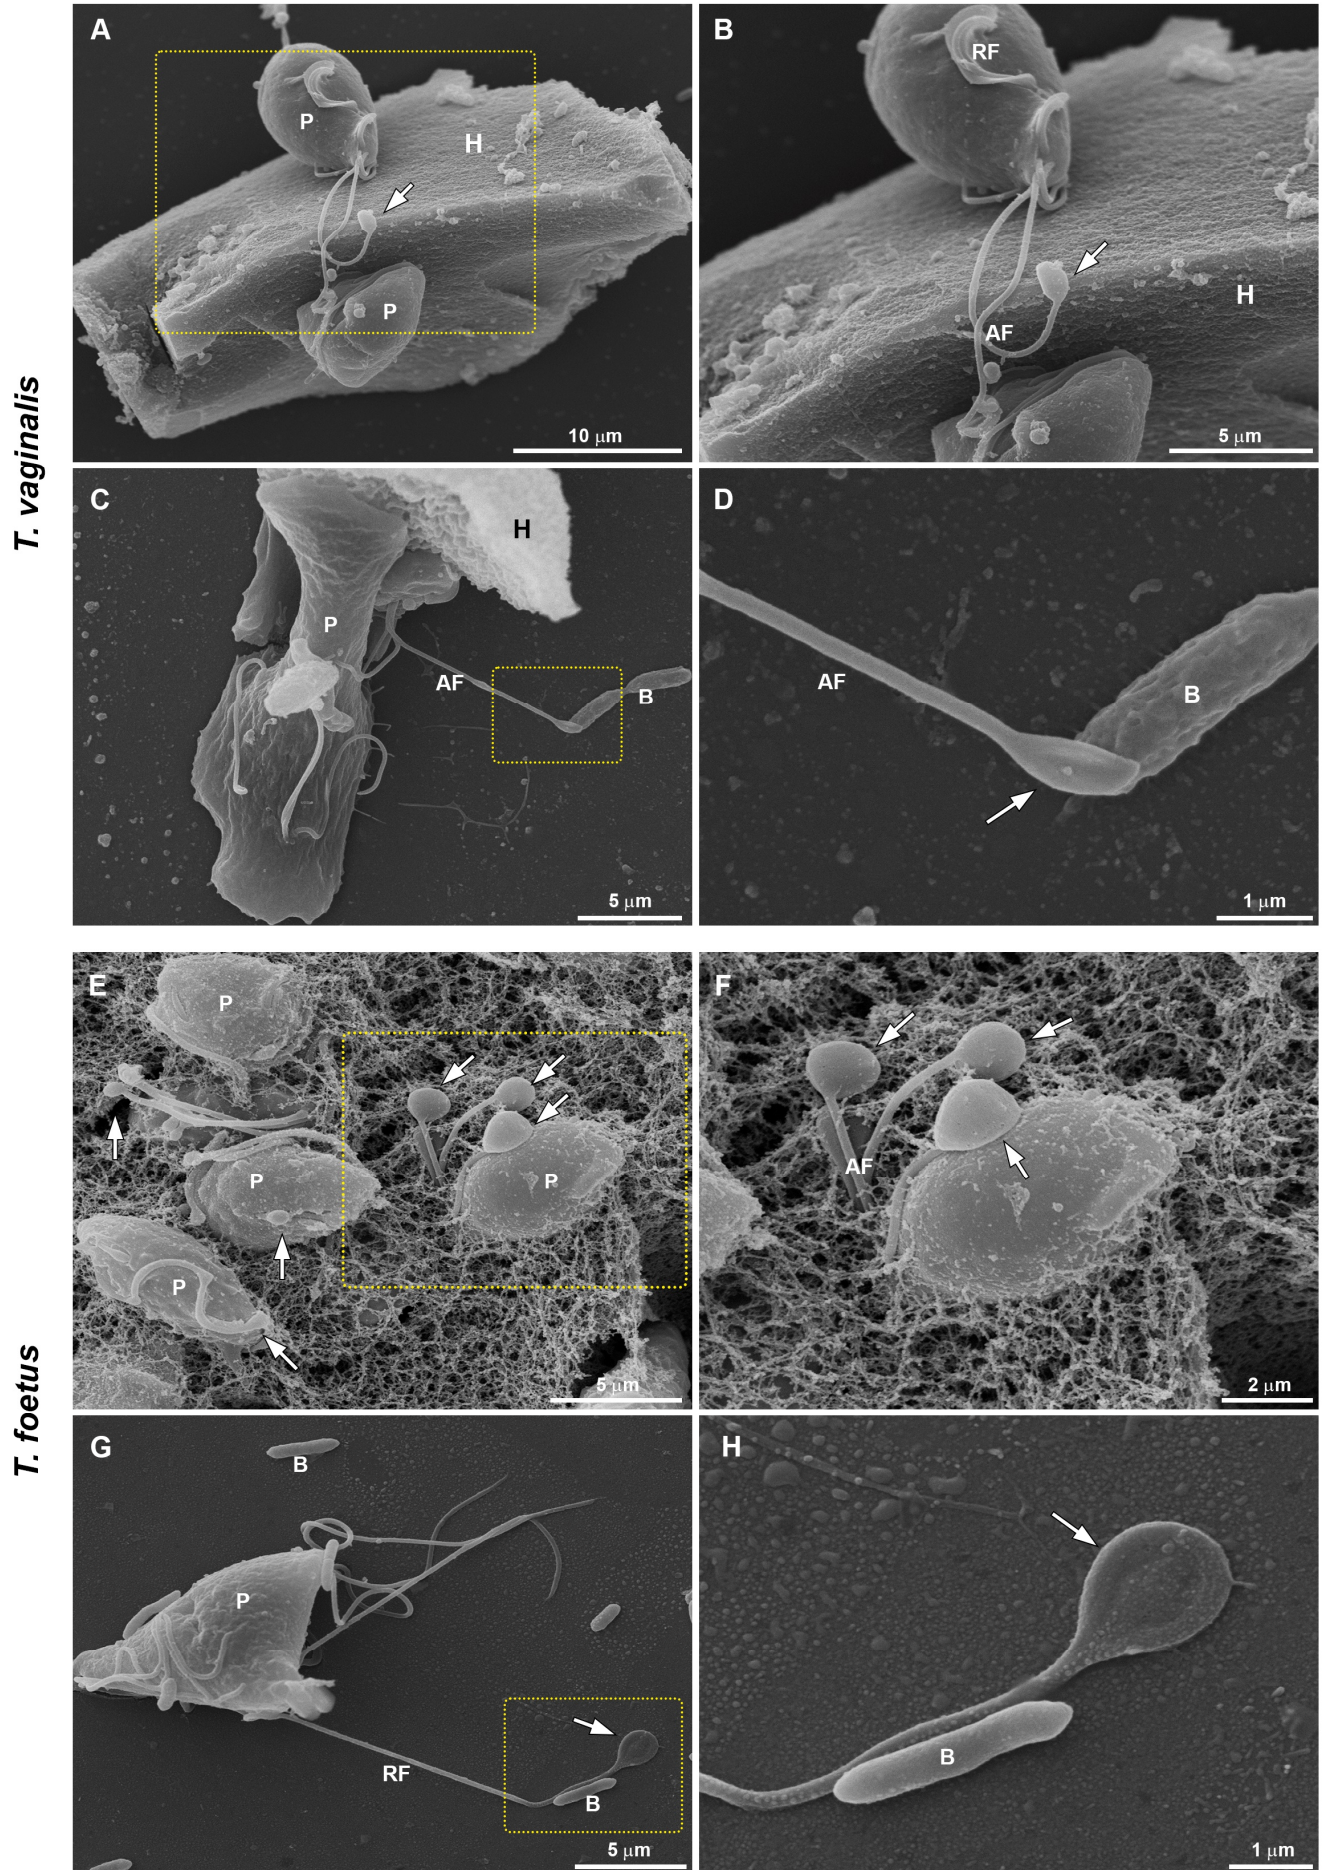

857 **S8 Figure. SEM of flagellar swellings in *T. vaginalis* and *T. foetus*.** (A-B) Flagellar swelling  
858 (arrow) in a *T. vaginalis* (P) attached on a prostatic epithelial cell (H). (C-D) and (G-H) Swellings  
859 (arrows) in direct contact to bacteria (B) after host cells interaction assays. (E-F) Swellings  
860 (arrows) in *T. foetus* (P) adhered to the network-shaped mesh of preputial mucus. AF, anterior  
861 flagella; RF, recurrent flagellum.

## 862 REFERENCES

- 863 Akella, J. S., Carter, S. P., Nguyen, K., Tsiropoulou, S., Moran, A. L., Silva, M., . . . Blacque, O.  
864 E. (2020). Ciliary Rab28 and the BBSome negatively regulate extracellular vesicle  
865 shedding. *Elife*, 9. doi: 10.7554/eLife.50580
- 866 Anvarian, Z., Mykytyn, K., Mukhopadhyay, S., Pedersen, L. B., & Christensen, S. T. (2019).  
867 Cellular signalling by primary cilia in development, organ function and disease. *Nat Rev*  
868 *Nephrol*, 15(4), 199-219. doi: 10.1038/s41581-019-0116-9
- 869 Bastin, P., Matthews, K. R., & Gull, K. (1996). The paraflagellar rod of kinetoplastida: solved  
870 and unsolved questions. *Parasitol Today*, 12(8), 302-307. doi: 10.1016/0169-  
871 4758(96)10031-4
- 872 Benchimol, M. (2004). Trichomonads under Microscopy. *Microsc Microanal*, 10(5), 528-550.  
873 doi: 10.1017/S1431927604040905
- 874 Benchimol, M., & De Souza, W. (1990). Freeze-fracture study of *Trichomonas vaginalis*. *Mem*  
875 *Inst Oswaldo Cruz*, 85(4), 419-428. doi: 10.1590/s0074-02761990000400006
- 876 Benchimol, M., Elias, C. A., & de Souza, W. (1981). Specializations in the flagellar membrane  
877 to *Tritrichomonas foetus*. *J Parasitol*, 67(2), 174-178.
- 878 Benchimol, M., Elias, C. A., & de Souza, W. (1982). *Tritrichomonas foetus*: fine structure of  
879 freeze-fractured membranes. *J Protozool*, 29(3), 348-353. doi: 10.1111/j.1550-  
880 7408.1982.tb05413.x
- 881 Benchimol, M., Kachar, B., & De Souza, W. (1992). Surface domains in the pathogenic  
882 protozoan *Tritrichomonas foetus*. *J Protozool*, 39(4), 480-484. doi: 10.1111/j.1550-  
883 7408.1992.tb04835.x
- 884 Brooker, B. E. (1970). Desmosomes and hemidesmosomes in the flagellate *Crithidia fasciculata*.  
885 *Z Zellforsch Mikrosk Anat*, 105(2), 155-166. doi: 10.1007/BF00335467
- 886 Brugerolle, G. (1999). *Pseudotrypanosoma giganteum* of *Porotermes*, a *Trichomonad* with a  
887 contractile costa. *Eur J Protistol*, 35, 121-128. doi: 10.1016/S0932-4739(99)80029-7
- 888 Brugerolle, G. (2005). The Amoeboid Parabasalid Flagellate *Gigantomonas herculea* of the  
889 African Termite *Hodotermes mossambicus* Reinvestigated Using Immunological  
890 and Ultrastructural Techniques. *Acta Protozool.*, 44, 189 - 199.
- 891 Brugerolle, G. B., A; König, H. (1994). Ultrastructural study of *Pentatrichomonoides* sp., a  
892 trichomonad flagellate from *Mastotermes darwiniensis*. *Eur J Protistol*, 30, 372-378.
- 893 Carter, S. P., & Blacque, O. E. (2019). Membrane retrieval, recycling and release pathways that  
894 organise and sculpt the ciliary membrane. *Curr Opin Cell Biol*, 59, 133-139. doi:  
895 10.1016/j.ceb.2019.04.007
- 896 Cashikar, A. G., Shim, S., Roth, R., Maldazys, M. R., Heuser, J. E., & Hanson, P. I. (2014).  
897 Structure of cellular ESCRT-III spirals and their relationship to HIV budding. *Elife*, 3.  
898 doi: 10.7554/eLife.02184
- 899 Casta e Silva Filho, F., de Souza, W., & Lopes, J. D. (1988). Presence of laminin-binding proteins  
900 in trichomonads and their role in adhesion. *Proc Natl Acad Sci U S A*, 85(21), 8042-8046.  
901 doi: 10.1073/pnas.85.21.8042
- 902 Čepička, I., Dolan, M. F., & Gile, G. H. . (2016). Parabasalia. *Handbook of the Protists*, 1-44.  
903 doi: 10.1007/978-3-319-32669-6\_9-1
- 904 Ceza, V., Panek, T., Smejkalova, P., & Cepicka, I. (2015). Molecular and morphological diversity  
905 of the genus *Hypotrichomonas* (Parabasalia: Hypotrichomonadida), with descriptions of  
906 six new species. *Eur J Protistol*, 51(2), 158-172. doi: 10.1016/j.ejop.2015.02.003
- 907 Coceres, V. M., Alonso, A. M., Nievas, Y. R., Midlejš, V., Frontera, L., Benchimol, M., . . . de  
908 Miguel, N. (2015). The C-terminal tail of tetraspanin proteins regulates their intracellular  
909 distribution in the parasite *Trichomonas vaginalis*. *Cell Microbiol*, 17(8), 1217-1229. doi:  
910 10.1111/cmi.12431



- 911 Current, W. (1980). Cryptobia Sp. In the Snail Triadopsis Multilineata (Say): Fine Structure of  
912 Attached Flagellates and Their Mode of Attachment to the Spermatheca. *J Protozool*,  
913 27(3), 278-287. doi: 10.1111/j.1550-7408.1980.tb04257.x
- 914 Dabrowska, J., Keller, I., Karamon, J., Kochanowski, M., Gottstein, B., Cencek, T., . . . Muller,  
915 N. (2020). Whole genome sequencing of a feline strain of Tritrichomonas foetus reveals  
916 massive genetic differences to bovine and porcine isolates. *Int J Parasitol*, 50(3), 227-  
917 233. doi: 10.1016/j.ijpara.2019.12.007
- 918 de Andrade Rosa, I., de Souza, W., & Benchimol, M. (2013). High-resolution scanning electron  
919 microscopy of the cytoskeleton of Tritrichomonas foetus. *J Struct Biol*, 183(3), 412-418.  
920 doi: 10.1016/j.jsb.2013.07.002
- 921 de Miguel, N., Riestra, A., & Johnson, P. J. (2012). Reversible association of tetraspanin with  
922 Trichomonas vaginalis flagella upon adherence to host cells. *Cell Microbiol*, 14(12),  
923 1797-1807. doi: 10.1111/cmi.12003
- 924 de Souza, W., & Attias, M. (2018). New advances in scanning microscopy and its application to  
925 study parasitic protozoa. *Exp Parasitol*, 190, 10-33. doi: 10.1016/j.exppara.2018.04.018
- 926 Delgadillo, M. G., Liston, D. R., Niazi, K., & Johnson, P. J. (1997). Transient and selectable  
927 transformation of the parasitic protist Trichomonas vaginalis. *Proc Natl Acad Sci U S A*,  
928 94(9), 4716-4720. doi: 10.1073/pnas.94.9.4716
- 929 Diener, D. R., Lupetti, P., & Rosenbaum, J. L. (2015). Proteomic analysis of isolated ciliary  
930 transition zones reveals the presence of ESCRT proteins. *Curr Biol*, 25(3), 379-384. doi:  
931 10.1016/j.cub.2014.11.066
- 932 Dolger, J., Nielsen, L. T., Kiorboe, T., & Andersen, A. (2017). Swimming and feeding of  
933 mixotrophic biflagellates. *Sci Rep*, 7, 39892. doi: 10.1038/srep39892
- 934 Eddy, E. M., Toshimori, K., & O'Brien, D. A. (2003). Fibrous sheath of mammalian spermatozoa.  
935 *Microsc Res Tech*, 61(1), 103-115. doi: 10.1002/jemt.10320
- 936 Eliaz, D., Kannan, S., Shaked, H., Arvatz, G., Tkacz, I. D., Binder, L., . . . Michaeli, S. (2017).  
937 Exosome secretion affects social motility in Trypanosoma brucei. *PLoS Pathog*, 13(3),  
938 e1006245. doi: 10.1371/journal.ppat.1006245
- 939 Frolov, A. O., Malysheva, M. N., Ganyukova, A. I., Yurchenko, V., & Kostygov, A. Y. (2018).  
940 Correction: Obligate development of Blastocrithidia papi (Trypanosomatidae) in the  
941 Malpighian tubules of Pyrrhocoris apterus (Hemiptera) and coordination of host-parasite  
942 life cycles. *PLoS One*, 13(11), e0208178. doi: 10.1371/journal.pone.0208178
- 943 Fussy, Z., Masarova, P., Krucinska, J., Esson, H. J., & Obornik, M. (2017). Budding of the  
944 Alveolate Alga Vitrella brassicaformis Resembles Sexual and Asexual Processes in  
945 Apicomplexan Parasites. *Protist*, 168(1), 80-91. doi: 10.1016/j.protis.2016.12.001
- 946 Gander, S., Scholten, V., Osswald, I., Sutton, M., & van Wylick, R. (2009). Cervical dysplasia  
947 and associated risk factors in a juvenile detainee population. *J Pediatr Adolesc Gynecol*,  
948 22(6), 351-355. doi: 10.1016/j.jpag.2009.01.070
- 949 Ginger, M. L., Collingridge, P. W., Brown, R. W., Sproat, R., Shaw, M. K., & Gull, K. (2013).  
950 Calmodulin is required for paraflagellar rod assembly and flagellum-cell body attachment  
951 in trypanosomes. *Protist*, 164(4), 528-540. doi: 10.1016/j.protis.2013.05.002
- 952 Gookin, J. L., Hanrahan, K., & Levy, M. G. (2017). The conundrum of feline Trichomonosis. *J*  
953 *Feline Med Surg*, 19(3), 261-274. doi: 10.1177/1098612X17693499
- 954 Hardin, W. R., Li, R., Xu, J., Shelton, A. M., Alas, G. C. M., Minin, V. N., & Paredes, A. R.  
955 (2017). Myosin-independent cytokinesis in Giardia utilizes flagella to coordinate force  
956 generation and direct membrane trafficking. *Proc Natl Acad Sci U S A*, 114(29), E5854-  
957 E5863. doi: 10.1073/pnas.1705096114
- 958 Honigberg, B. M., & King, V. M. (1964). Structure of Trichomonas Vaginalis Donn'e. *J*  
959 *Parasitol*, 50, 345-364.
- 960 Honigberg, B. M., Volkmann, D., Entzeroth, R., & Scholtyseck, E. (1984). A freeze-fracture  
961 electron microscope study of Trichomonas vaginalis Donne and Tritrichomonas foetus  
962 (Riedmuller). *J Protozool*, 31(1), 116-131. doi: 10.1111/j.1550-7408.1984.tb04300.x

- 963 Hu, J., Wittekind, S. G., & Barr, M. M. (2007). STAM and Hrs down-regulate ciliary TRP  
964 receptors. *Mol Biol Cell*, *18*(9), 3277-3289. doi: 10.1091/mbc.e07-03-0239
- 965 Huber, S. T., Mostafavi, S., Mortensen, S. A., & Sachse, C. (2020). Structure and assembly of  
966 ESCRT-III helical Vps24 filaments. *Sci Adv*, *6*(34), eaba4897. doi:  
967 10.1126/sciadv.aba4897
- 968 Imhof, S., Fragoso, C., Hemphill, A., von Schubert, C., Li, D., Legant, W., . . . Roditi, I. (2016).  
969 Flagellar membrane fusion and protein exchange in trypanosomes; a new form of cell-  
970 cell communication? *F1000Res*, *5*, 682. doi: 10.12688/f1000research.8249.1
- 971 Imhof, S., Zhang, J., Wang, H., Bui, K. H., Nguyen, H., Atanasov, I., . . . Hill, K. L. (2019). Cryo  
972 electron tomography with volta phase plate reveals novel structural foundations of the 96-  
973 nm axonemal repeat in the pathogen *Trypanosoma brucei*. *Elife*, *8*. doi:  
974 10.7554/eLife.52058
- 975 Iriarte, L. S., Midlej, V., Frontera, L. S., Moros Duarte, D., Barbeito, C. G., de Souza, W., . . .  
976 Coceres, V. M. (2018). TfVPS32 Regulates Cell Division in the Parasite *Tritrichomonas*  
977 *foetus*. *J Eukaryot Microbiol*, *65*(1), 28-37. doi: 10.1111/jeu.12424
- 978 Jung, E., Choi, T. I., Lee, J. E., Kim, C. H., & Kim, J. (2020). ESCRT subunit CHMP4B localizes  
979 to primary cilia and is required for the structural integrity of the ciliary membrane. *FASEB*  
980 *J*, *34*(1), 1331-1344. doi: 10.1096/fj.201901778R
- 981 Kelly, F. D., Sanchez, M. A., & Landfear, S. M. (2020). Touching the Surface: Diverse Roles for  
982 the Flagellar Membrane in Kinetoplastid Parasites. *Microbiol Mol Biol Rev*, *84*(2). doi:  
983 10.1128/MMBR.00079-19
- 984 Kirby, H. (1951). Observations on the trichomonad flagellate of the reproductive organs of cattle.  
985 *J Parasitol*, *37*(51), 445-459.
- 986 Kissinger, P. (2015). *Trichomonas vaginalis*: a review of epidemiologic, clinical and treatment  
987 issues. *BMC Infect Dis*, *15*, 307. doi: 10.1186/s12879-015-1055-0
- 988 Kruger, T., & Engstler, M. (2015). Flagellar motility in eukaryotic human parasites. *Semin Cell*  
989 *Dev Biol*, *46*, 113-127. doi: 10.1016/j.semcd.2015.10.034
- 990 Kusdian, G., Woehle, C., Martin, W. F., & Gould, S. B. (2013). The actin-based machinery of  
991 *Trichomonas vaginalis* mediates flagellate-amoeboid transition and migration across host  
992 tissue. *Cell Microbiol*, *15*(10), 1707-1721. doi: 10.1111/cmi.12144
- 993 Labhart, P., & Koller, T. (1981). Electron microscope specimen preparation of rat liver chromatin  
994 by a modified Miller spreading technique. *Eur J Cell Biol*, *24*(2), 309-316.
- 995 Landfear, S. M., Tran, K. D., & Sanchez, M. A. (2015). Flagellar membrane proteins in  
996 kinetoplastid parasites. *IUBMB Life*, *67*(9), 668-676. doi: 10.1002/iub.1411
- 997 Lee, K. E., Kim, J. H., Jung, M. K., Arai, T., Ryu, J. S., & Han, S. S. (2009). Three-dimensional  
998 structure of the cytoskeleton in *Trichomonas vaginalis* revealed new features. *J Electron*  
999 *Microsc (Tokyo)*, *58*(5), 305-313. doi: 10.1093/jmicro/dfp019
- 1000 Lenaghan, S. C., Nwandu-Vincent, S., Reese, B. E., & Zhang, M. (2014). Unlocking the secrets  
1001 of multi-flagellated propulsion: drawing insights from *Tritrichomonas foetus*. *J R Soc*  
1002 *Interface*, *11*(93), 20131149. doi: 10.1098/rsif.2013.1149
- 1003 Linck, R. W., Chemes, H., & Albertini, D. F. (2016). The axoneme: the propulsive engine of  
1004 spermatozoa and cilia and associated ciliopathies leading to infertility. *J Assist Reprod*  
1005 *Genet*, *33*(2), 141-156. doi: 10.1007/s10815-016-0652-1
- 1006 Liu, P., Lou, X., Wingfield, J. L., Lin, J., Nicastro, D., & Lechtreck, K. (2020). *Chlamydomonas*  
1007 *PKD2* organizes mastigonemes, hair-like glycoprotein polymers on cilia. *J Cell Biol*,  
1008 *219*(6). doi: 10.1083/jcb.202001122
- 1009 Long, H., Zhang, F., Xu, N., Liu, G., Diener, D. R., Rosenbaum, J. L., & Huang, K. (2016).  
1010 Comparative Analysis of Ciliary Membranes and Ectosomes. *Curr Biol*, *26*(24), 3327-  
1011 3335. doi: 10.1016/j.cub.2016.09.055
- 1012 Lopes, L. C., Ribeiro, K. C., & Benchimol, M. (2001). Immunolocalization of tubulin isoforms  
1013 and post-translational modifications in the protists *Tritrichomonas foetus* and  
1014 *Trichomonas vaginalis*. *Histochem Cell Biol*, *116*(1), 17-29. doi: 10.1007/s004180100285

- 1015 Lustig, G., Ryan, C. M., Secor, W. E., & Johnson, P. J. (2013). Trichomonas vaginalis contact-  
1016 dependent cytolysis of epithelial cells. *Infect Immun*, *81*(5), 1411-1419. doi:  
1017 10.1128/IAI.01244-12
- 1018 Maga, J. A., & LeBowitz, J. H. (1999). Unravelling the kinetoplastid paraflagellar rod. *Trends*  
1019 *Cell Biol*, *9*(10), 409-413. doi: 10.1016/s0962-8924(99)01635-9
- 1020 Maharana, B. R., Tewari, A. K., & Singh, V. (2015). An overview on kinetoplastid paraflagellar  
1021 rod. *J Parasit Dis*, *39*(4), 589-595. doi: 10.1007/s12639-014-0422-x
- 1022 Maia-Brigagao, C., Gadelha, A. P., & de Souza, W. (2013). New associated structures of the  
1023 anterior flagella of Giardia duodenalis. *Microsc Microanal*, *19*(5), 1374-1376. doi:  
1024 10.1017/S1431927613013275
- 1025 Mardones, F. O., Perez, A. M., Martinez, A., & Carpenter, T. E. (2008). Risk factors associated  
1026 with Tritrichomonas foetus infection in beef herds in the Province of Buenos Aires,  
1027 Argentina. *Vet Parasitol*, *153*(3-4), 231-237. doi: 10.1016/j.vetpar.2008.01.038
- 1028 Maric, D., Epting, C. L., & Engman, D. M. (2010). Composition and sensory function of the  
1029 trypanosome flagellar membrane. *Curr Opin Microbiol*, *13*(4), 466-472. doi:  
1030 10.1016/j.mib.2010.06.001
- 1031 Martin-Gomez, S., Gonzalez-Paniello, R., Pereira-Bueno, J., & Ortega-Mora, L. M. (1998).  
1032 Prevalence of Tritrichomonas foetus infection in beef bulls in northwestern Spain. *Vet*  
1033 *Parasitol*, *75*(2-3), 265-268.
- 1034 Mattern, C. F., Honigberg, B. M., & Daniel, W. A. (1973). Fine-structural changes associated  
1035 with pseudocyst formation in Trichomitus batrachorum. *J Protozool*, *20*(2), 222-229. doi:  
1036 10.1111/j.1550-7408.1973.tb00869.x
- 1037 McClelland, R. S., Sangare, L., Hassan, W. M., Lavreys, L., Mandaliya, K., Kiarie, J., . . . Baeten,  
1038 J. M. (2007). Infection with Trichomonas vaginalis increases the risk of HIV-1  
1039 acquisition. *J Infect Dis*, *195*(5), 698-702. doi: 10.1086/511278
- 1040 McCullough, J., Frost, A., & Sundquist, W. I. (2018). Structures, Functions, and Dynamics of  
1041 ESCRT-III/Vps4 Membrane Remodeling and Fission Complexes. *Annu Rev Cell Dev*  
1042 *Biol*, *34*, 85-109. doi: 10.1146/annurev-cellbio-100616-060600
- 1043 Meites, E., Gaydos, C. A., Hobbs, M. M., Kissinger, P., Nyirjesy, P., Schwebke, J. R., . . .  
1044 Workowski, K. A. (2015). A Review of Evidence-Based Care of Symptomatic  
1045 Trichomoniasis and Asymptomatic Trichomonas vaginalis Infections. *Clin Infect Dis*, *61*  
1046 *Suppl 8*, S837-848. doi: 10.1093/cid/civ738
- 1047 Melkonian, M., Andersen, R., Schnepf, E. (1991). The Cytoskeleton of Flagellate and Ciliate  
1048 Protists. *Protoplasma*, *164*, No. 1-3, 20. doi: <https://doi.org/10.1007/978-3-7091-6714-4>
- 1049 Miao, Y., Liu, B. P., & Hua, B. Z. (2019). Spermiogenesis of the hangingfly Terrobittacus  
1050 implicatus (Huang and Hua) (Mecoptera: Bittacidae). *Protoplasma*, *256*(6), 1695-1703.  
1051 doi: 10.1007/s00709-019-01415-w
- 1052 Midlej, V., & Benchimol, M. (2010). Trichomonas vaginalis kills and eats--evidence for  
1053 phagocytic activity as a cytopathic effect. *Parasitology*, *137*(1), 65-76. doi:  
1054 10.1017/S0031182009991041
- 1055 Midlej, V., Vilela, R., Dias, A. B., & Benchimol, M. (2009). Cytopathic effects of Tritrichomonas  
1056 foetus on bovine oviduct cells. *Vet Parasitol*, *165*(3-4), 216-230. doi:  
1057 10.1016/j.vetpar.2009.07.021
- 1058 Molyneux, D. H. (1975). Trypanosoma (Megatrypanum) melophagium: Modes of attachment of  
1059 parasites to midgut, hindgut and rectum of the sheep ked, Melophagus ovinus. *Acta Trop*,  
1060 65-74.
- 1061 Moran, J., McKean, P. G., & Ginger, M. L. (2014). Eukaryotic Flagella: Variations in Form,  
1062 Function, and Composition during Evolution. *BioScience*, *64*(12), 1103-1114. doi:  
1063 10.1093/biosci/biu175
- 1064 Morone, N., Fujiwara, T., Murase, K., Kasai, R. S., Ike, H., Yuasa, S., . . . Kusumi, A. (2006).  
1065 Three-dimensional reconstruction of the membrane skeleton at the plasma membrane

- 1066 interface by electron tomography. *J Cell Biol*, 174(6), 851-862. doi:  
1067 10.1083/jcb.200606007
- 1068 Nager, A. R., Goldstein, J. S., Herranz-Perez, V., Portran, D., Ye, F., Garcia-Verdugo, J. M., &  
1069 Nachury, M. V. (2017). An Actin Network Dispatches Ciliary GPCRs into Extracellular  
1070 Vesicles to Modulate Signaling. *Cell*, 168(1-2), 252-263 e214. doi:  
1071 10.1016/j.cell.2016.11.036
- 1072 Nievas, Y. R., Coceres, V. M., Midlej, V., de Souza, W., Benchimol, M., Pereira-Neves, A., . . .  
1073 de Miguel, N. (2018). Membrane-shed vesicles from the parasite *Trichomonas vaginalis*:  
1074 characterization and their association with cell interaction. *Cell Mol Life Sci*, 75(12),  
1075 2211-2226. doi: 10.1007/s00018-017-2726-3
- 1076 Oberholzer, M., Lopez, M. A., McLelland, B. T., & Hill, K. L. (2010). Social motility in african  
1077 trypanosomes. *PLoS Pathog*, 6(1), e1000739. doi: 10.1371/journal.ppat.1000739
- 1078 Pereira-Neves, A., & Benchimol, M. (2007). Phagocytosis by *Trichomonas vaginalis*: new  
1079 insights. *Biol Cell*, 99(2), 87-101. doi: 10.1042/BC20060084
- 1080 Pereira-Neves, A., Rosales-Encina, J. L., Meyer-Fernandes, J. R., & Benchimol, M. (2014).  
1081 *Tritrichomonas foetus*: characterisation of ecto-phosphatase activities in the endoflagellar  
1082 form and their possible participation on the parasite's transformation and cytotoxicity. *Exp*  
1083 *Parasitol*, 142, 67-82. doi: 10.1016/j.exppara.2014.04.007
- 1084 Portman, N., & Gull, K. (2010). The paraflagellar rod of kinetoplastid parasites: from structure  
1085 to components and function. *Int J Parasitol*, 40(2), 135-148. doi:  
1086 10.1016/j.ijpara.2009.10.005
- 1087 Ralston, K. S., Lerner, A. G., Diener, D. R., & Hill, K. L. (2006). Flagellar motility contributes  
1088 to cytokinesis in *Trypanosoma brucei* and is modulated by an evolutionarily conserved  
1089 dynein regulatory system. *Eukaryot Cell*, 5(4), 696-711. doi: 10.1128/EC.5.4.696-  
1090 711.2006
- 1091 Ribeiro, K. C., Monteiro-Leal, L. H., & Benchimol, M. (2000). Contributions of the axostyle and  
1092 flagella to closed mitosis in the protists *Tritrichomonas foetus* and *Trichomonas vaginalis*.  
1093 *J Eukaryot Microbiol*, 47(5), 481-492. doi: 10.1111/j.1550-7408.2000.tb00077.x
- 1094 Rocha, G. M., Miranda, K., Weissmuller, G., Bisch, P. M., & de Souza, W. (2010). Visualization  
1095 of the flagellar surface of protists by atomic force microscopy. *Micron*, 41(8), 939-944.  
1096 doi: 10.1016/j.micron.2010.07.007
- 1097 Roditi, I. (2016). The languages of parasite communication. *Mol Biochem Parasitol*, 208(1), 16-  
1098 22. doi: 10.1016/j.molbiopara.2016.05.008
- 1099 Salinas, R. Y., Pearing, J. N., Ding, J. D., Spencer, W. J., Hao, Y., & Arshavsky, V. Y. (2017).  
1100 Photoreceptor discs form through peripherin-dependent suppression of ciliary ectosome  
1101 release. *J Cell Biol*, 216(5), 1489-1499. doi: 10.1083/jcb.201608081
- 1102 Satir, B., Schooley, C., & Satir, P. (1973). Membrane fusion in a model system. Mucocyst  
1103 secretion in *Tetrahymena*. *J Cell Biol*, 56(1), 153-176. doi: 10.1083/jcb.56.1.153
- 1104 Shaw, S., DeMarco, S. F., Rehmann, R., Wenzler, T., Florini, F., Roditi, I., & Hill, K. L. (2019).  
1105 Flagellar cAMP signaling controls trypanosome progression through host tissues. *Nat*  
1106 *Commun*, 10(1), 803. doi: 10.1038/s41467-019-08696-y
- 1107 Shimogawa, M. M., Ray, S. S., Kisalu, N., Zhang, Y., Geng, Q., Ozcan, A., & Hill, K. L. (2018).  
1108 Parasite motility is critical for virulence of African trypanosomes. *Sci Rep*, 8(1), 9122.  
1109 doi: 10.1038/s41598-018-27228-0
- 1110 Singh, B. N., Lucas, J. J., Beach, D. H., Shin, S. T., & Gilbert, R. O. (1999). Adhesion of  
1111 *Tritrichomonas foetus* to Bovine Vaginal Epithelial Cells. *Infect Immun*,  
1112 67(8), 3847-3854. doi: 10.1128/iai.67.8.3847-3854.1999
- 1113 Stark, J. R., Judson, G., Alderete, J. F., Mundodi, V., Kucknoor, A. S., Giovannucci, E. L., . . .  
1114 Mucci, L. A. (2009). Prospective study of *Trichomonas vaginalis* infection and prostate  
1115 cancer incidence and mortality: Physicians' Health Study. *J Natl Cancer Inst*, 101(20),  
1116 1406-1411. doi: 10.1093/jnci/djp306

- 1117 Sugrue, P., Hiron, M. R., Adam, J. U., & Holwill, M. E. (1988). Flagellar wave reversal in the  
1118 kinetoplastid flagellate *Crithidia oncopelti*. *Biol Cell*, *63*(2), 127-131. doi: 10.1016/0248-  
1119 4900(88)90051-2
- 1120 Sutcliffe, S., Alderete, J. F., Till, C., Goodman, P. J., Hsing, A. W., Zenilman, J. M., . . . Platz,  
1121 E. A. (2009). Trichomonosis and subsequent risk of prostate cancer in the Prostate Cancer  
1122 Prevention Trial. *Int J Cancer*, *124*(9), 2082-2087. doi: 10.1002/ijc.24144
- 1123 Szempruch, A. J., Sykes, S. E., Kieft, R., Dennison, L., Becker, A. C., Gartrell, A., . . . Harrington,  
1124 J. M. (2016). Extracellular Vesicles from *Trypanosoma brucei* Mediate Virulence Factor  
1125 Transfer and Cause Host Anemia. *Cell*, *164*(1-2), 246-257. doi:  
1126 10.1016/j.cell.2015.11.051
- 1127 Tang, S., Henne, W. M., Borbat, P. P., Buchkovich, N. J., Freed, J. H., Mao, Y., . . . Emr, S. D.  
1128 (2015). Structural basis for activation, assembly and membrane binding of ESCRT-III  
1129 Snf7 filaments. *Elife*, *4*. doi: 10.7554/eLife.12548
- 1130 Tieszen, K. L., Molyneux, D. H., & Abdel-Hafez, S. K. (1989). Host—parasite relationships and  
1131 cysts of *Leptomonas lygaei* (Trypanosomatidae) in *Lygaeus pandurus* (Hemiptera:  
1132 Lygaeidae). *Parasitology*, 395-400 doi: 10.1017/S0031182000061473
- 1133 Twu, O., de Miguel, N., Lustig, G., Stevens, G. C., Vashisht, A. A., Wohlschlegel, J. A., &  
1134 Johnson, P. J. (2013). *Trichomonas vaginalis* exosomes deliver cargo to host cells and  
1135 mediate host-parasite interactions. *PLoS Pathog*, *9*(7), e1003482. doi:  
1136 10.1371/journal.ppat.1003482
- 1137 Twu, O., Dessi, D., Vu, A., Mercer, F., Stevens, G. C., de Miguel, N., . . . Johnson, P. J. (2014).  
1138 *Trichomonas vaginalis* homolog of macrophage migration inhibitory factor induces  
1139 prostate cell growth, invasiveness, and inflammatory responses. *Proc Natl Acad Sci U S*  
1140 *A*, *111*(22), 8179-8184. doi: 10.1073/pnas.1321884111
- 1141 Van Der Pol, B., Kwok, C., Pierre-Louis, B., Rinaldi, A., Salata, R. A., Chen, P. L., . . . Morrison,  
1142 C. S. (2008). *Trichomonas vaginalis* infection and human immunodeficiency virus  
1143 acquisition in African women. *J Infect Dis*, *197*(4), 548-554. doi: 10.1086/526496
- 1144 Van Gerwen, O. T., & Muzny, C. A. (2019). Recent advances in the epidemiology, diagnosis,  
1145 and management of *Trichomonas vaginalis* infection. *F1000Res*, *8*. doi:  
1146 10.12688/f1000research.19972.1
- 1147 Vaughan, S. (2010). Assembly of the flagellum and its role in cell morphogenesis in  
1148 *Trypanosoma brucei*. *Curr Opin Microbiol*, *13*(4), 453-458. doi:  
1149 10.1016/j.mib.2010.05.006
- 1150 Viscogliosi, E., & Brugerolle, G. (1993). Cytoskeleton in trichomonads: II. Immunological and  
1151 biochemical characterization of the preaxostylar fibres and undulating membrane in the  
1152 genus *Tritrichomonas*. *Eur J Protistol*, *29*(4), 381-389. doi: 10.1016/S0932-  
1153 4739(11)80400-1
- 1154 Wan, K. Y., & Jekely, G. (2020). On the unity and diversity of cilia. *Philos Trans R Soc Lond B*  
1155 *Biol Sci*, *375*(1792), 20190148. doi: 10.1098/rstb.2019.0148
- 1156 Wang, J., & Barr, M. M. (2018). Cell-cell communication via ciliary extracellular vesicles: clues  
1157 from model systems. *Essays Biochem*, *62*(2), 205-213. doi: 10.1042/EBC20170085
- 1158 WHO. (2018). Report on global sexually transmitted infection surveillance
- 1159 Wood, C. R., Huang, K., Diener, D. R., & Rosenbaum, J. L. (2013). The cilium secretes bioactive  
1160 ectosomes. *Curr Biol*, *23*(10), 906-911. doi: 10.1016/j.cub.2013.04.019
- 1161 Yubuki, N., Huang, S. S., & Leander, B. S. (2016). Comparative Ultrastructure of Fornicate  
1162 Excavates, Including a Novel Free-living Relative of Diplomonads: *Aduncisulcus*  
1163 *paluster* gen. et sp. nov. *Protist*, *167*(6), 584-596. doi: 10.1016/j.protis.2016.10.001
- 1164 Zhang, J., Wang, H., Imhof, S., Zhou, X., Liao, S., Atanasov, I., . . . Zhou, Z. H. (2021). Structure  
1165 of the trypanosome paraflagellar rod and insights into non-planar motility of eukaryotic  
1166 cells. *Cell Discov*, *7*(1), 51. doi: 10.1038/s41421-021-00281-2

1167 Zhao, W., Li, Z., Ping, P., Wang, G., Yuan, X., & Sun, F. (2018). Outer dense fibers stabilize the  
1168 axoneme to maintain sperm motility. *J Cell Mol Med*, 22(3), 1755-1768. doi:  
1169 10.1111/jcmm.13457

Nome do arquivo:

[https://d.docs.live.net/35fc6c14035a9c96/Documents/Fla  
gelos/Paper paraflagellar filaments/Figuras/Manuscript.docx](https://d.docs.live.net/35fc6c14035a9c96/Documents/Fla<br/>gelos/Paper paraflagellar filaments/Figuras/Manuscript.docx)

Diretório:

Modelo:

C:\Users\anton\AppData\Roaming\Microsoft\Templates\  
Normal.dotm

Título: Phagocytosis by Trichomonas vaginalis - New Insights

Assunto:

Autor: User

Palavras-chave:

Comentários:

Data de criação: 26/07/2021 12:46:00

Número de alterações: 107

Última gravação: 26/07/2021 23:17:00

Salvo por: Antonio Pereira

Tempo total de edição: 252 Minutos

Última impressão: 27/07/2021 00:22:00

Como a última impressão

Número de páginas: 54

Número de palavras: 13.339

Número de caracteres: 146.949 (aprox.)
